# Supplementary material for: A Pan-cancer Clinical Study of Personalized Neoantigen Vaccine Monotherapy in Treating Patients with Various Types of Advanced Solid Tumors
Source: Oxford University Press journal article supplement (doi:10.1158/1078-0432.ccr-19-2881), 2020-05-21
Supplement: 10780432ccr192881-sup-228188_3_supp_6278638_q9vzyf.xlsx [file 10780432ccr192881-sup-228188_3_supp_6278638_q9vzyf.xlsx]

## Sheet: Supplementary Table S1
Supplementary Table S1. Treatment scheme and clinical response after personalized vaccine
							Prime Phase		Boost Phase
Patient ID	Age	Tumor type	Disease stage	Metastatic sites	Prior therapy1	Lines of prior systematic therapy	Dose (per peptide)	Total numbers of vaccination	Dose (per peptide)	Total numbers of vaccination	Best clinical response	PFS (months)	AEs
P001	55	Melanoma	IV	Mammary gland, Lung, Liver, Axilla, Dorsal, Lymph nodes, Bone	Chemo, RT, I-O, IFN, TT	≥3	100μg	5	-	-	SD	2.83
P002	47	Ovarian Cancer	IV	None	Surgery, Chemo, ET	≥3	100μg	5	-	-	PD	1.73
P003	57	Adrenal Sebaceous Adenocarcinoma	IV	Retroperitoneal lymph nodes, Kidney, Liver, Abdominal cavity, Pelvic cavity, Bone	Surgery, TT	2	100μg	5	300μg	2	PD	1.63	Fatigue
P004	68	Small Cell Lung Cancer	IV	Bone	Chemo, RT, RFA	2	100μg	5	300μg	3	SD	4.93
P005	62	Biliary Tract Cancer	IV	Lung, Liver	Surgery, Chemo, TACE, TT, I-O	≥3	100μg	5	300μg	6	SD	Not yet reached (>14.5)b	Skin allergic reaction
P006	56	Colon Cancer	IV	Peritoneum	Chemo	2	100μg	5	-	-	PD	1.73
P007	52	Non-Small Cell Lung Cancer	IV	Bone, Adrenal gland, Pancreas	Chemo, TT, RT	≥3	100μg	5	100μg	1	PD	1.53
P008	64	Pancreatic Carcinoma	IV	Liver	Surgery, Chemo, RFA	≥3	100μg	5	100μg	2	SD	4.2	Fatigue, Myalgia, Shiver
									300μg	1
P009	45	Pancreatic Carcinoma	IV	Retroperitoneum, Stomach	Surgery, Chemo	≥3	100μg	5	300μg	4	SD	6.3	Lose weight, Injection site reaction, Emesis
P010	65	Colon Cancer	IV	Lung, Liver	Chemo, Surgery, RFA, I-O	2	100μg	5	300μg	4	SD	11.4	Fever, Shiver
P011	65	Ovarian Cancer	IV	Mesentery	Surgery, Chemo	≥3	100μg	5	300μg	2	SD	4.9
P012	55	Breast Cancer	IV	Appendix, Peritoneum, Colon	Surgery, Chemo, ET, RT	≥3	100μg	5	300μg	3	SD	4.2
P013	28	Melanoma	IV	Lung, Liver, Inguinal lymph node	Surgery, IFN, Chemo, RT, I-O, TT, RFA	≥3	300μg	5	300μg	6	SD	7	Fatigue, Shiver, Skin allergic reaction
P014a	63	Melanoma	IV	Liver, Inguinal lymph node, Skin	Surgery, IFN, Chemo, TT, RFA	≥3	300μg	4	-	-	N.A.	N.A.
P015	56	Biliary Tract Cancer	IV	Liver	Chemo, RFA, TT	2	300μg	5	300μg	4	SD	Not yet reached (>10.8)b	Fever, Fatigue, Shiver, Nausea, Emesis, Upper gastrointestinal hemorrhage
P016	66	Non-Small Cell Lung Cancer	IV	Lung, Mediastinal lymph node	Chemo, I-O	≥3	300μg	5	300μg	3	SD	5.2
P017	62	Melanoma	IV	Lung, Lymph node	Surgery, IFN, RT, I-O	≥3	300μg	5	300μg	3	SD	5.3	Fatigue
P018	73	Parotid carcinoma	IV	Lung, Liver, Pleura, Tabula	Surgery, Chemo, RT, TT, I-O	2	300μg	5	300μg	3	PD	2.7
P019	61	Gastric carcinoma	IV	Liver, Skin, Retroperitoneal lymph nodes, Supraclavicular lymph node	Chemo, Surgery, RFA, I-O	≥3	300μg	5	300μg	5	SD	4.6	Fatigue
P020	61	Colon cancer	IV	Lung, Liver, Lymph node	Surgery, Chemo, RFA, TT, RT	≥3	300μg	5	300μg	2	SD	3.1	Fatigue, Fever, Myalgia
P021	61	Non-Small Cell Lung Cancer	IV	Lung, Para-pericardium, Greater omentum, Liver capsule	TT, Chemo, RFA	≥3	300μg	5	300μg	2	SD	2.9	Fatigue
P022	79	Colon cancer	IV	Lung	Surgery, Chemo, RT	2	300μg	5	-	-	PD	1.7	Dizzy
1Chemo: Chemotherapy, RT: Radiotherapy, I-O: Immune Ocology, IFN: Interferon a-2b, TT: Targeted Therapy, ET: Endocrine Therapy, RFA: Radiofrequency Ablation, TACE: Transarterial Chemoembolization.
a Withdraw informed consent and drop out of the study without completing priming phase, no data for clinical response and PFS was collected. N.A. represents not applicable.
b The last follow up: May. 31, 2019.

## Sheet: Supplementary Table S2
Supplementary Table S2. QC metrics of whole-exome sequencing for each patient
	P001	P001	P002	P002	P003	P003	P004	P004	P005	P005	P006	P006	P007	P007	P008	P008	P009	P009	P010	P010	P011	P011	P012	P012	P013	P013	P014		P015	P015	P016	P016	P017	P017	P018	P018	P019	P019	P020	P020	P021	P021	P022	P022
	Normal	Tumor	Normal	Tumor	Normal	Tumor	Normal	Tumor	Normal	Tumor	Normal	Tumor	Normal	Tumor	Normal	Tumor	Normal	Tumor	Normal	Tumor	Normal	Tumor	Normal	Tumor	Normal	Tumor	Normal	Tumor	Normal	Tumor	Normal	Tumor	Normal	Tumor	Normal	Tumor	Normal	Tumor	Normal	Tumor	Normal	Tumor	Normal	Tumor
Q30%	92.91	92.46	89.58	90.8	90.37	89.59	94.67	93.28	93.49	93.18	89.83	91.25	90.91	90.43	94.18	94	95.3	95.39	94.32	87.23	91.87	92.76	94.08	91.99	92.68	92.39	94.89	94.63	92.81	93.13	92.23	90.45	91.25	92.04	93.75	93.68	88.6	86.63	92.84	93.02	90.88	91.69	91.66	91.56
[Total] Raw Reads (All reads)	33370374	203268145	80696268	508696400	118717776	293647964	206045653	307328398	70611249	208021123	77589554	230671238	70584066	425308402	89930818	394686779	190437181	479759598	91887404	198515182	208571343	179834566	119806645	334060668	68471082	189421013	108510773	383053357	112561763	421168861	83912715	207423245	107650136	316364255	105791590	305725149	82447684	94070001	88145107	251490470	82047985	340251435	87629593	164179454
[Target] Average depth	35.19	217.39	83.65	539.43	122.9	281.04	206.58	249.46	113.55	318.03	73.05	215.46	74.4	453.46	92.52	405.64	201.36	505.71	86.16	135.4	210.26	160.32	125.72	329.72	92.17	246.22	145.59	516.6	114.85	440.06	122.45	306.57	147.2	471.05	101.12	273.79	136.28	154.91	148.9	426.53	83.68	322.17	115.2	221.71
[Target] Coverage (>=30x)	0.5337	0.9786	0.9048	0.9921	0.9267	0.9905	0.9476	0.9601	0.9661	0.9952	0.8087	0.9165	0.8747	0.9947	0.8971	0.9889	0.9795	0.9939	0.8305	0.9023	0.9783	0.9559	0.9484	0.9919	0.896	0.9779	0.9622	0.9964	0.9093	0.9694	0.9485	0.9805	0.9629	0.986	0.874	0.9327	0.896	0.8581	0.9433	0.9698	0.8797	0.9827	0.9497	0.9784
[Target] No Coverage	0.0084	0.0028	0.0038	0.0018	0.0039	0.0024	0.0197	0.0174	0.0018	0.0015	0.0204	0.0203	0.0018	0.0003	0.004	0.0028	0.0006	0.0003	0.0222	0.0118	0.0029	0.0029	0.0034	0.0027	0.0034	0.002	0.0007	0.0002	0.0187	0.0156	0.0096	0.0073	0.0056	0.0036	0.0192	0.0159	0.0158	0.0147	0.0212	0.0168	0.0043	0.0012	0.0061	0.0058
Contamination	0.00123	0.00045	0.00125	0.00159	0.00176	0.00701	0.0001	0.00038	0.00027	7e-05	0.00052	0.00128	0.00126	0.00115	0.00112	0.00084	0.00086	0.00088	0	0.00102	0.00084	0.00784	0.00087	0.00124	0.00154	0.0014	0.00129	0.00237	0.00093	0.00084	0.00083	0.00201	0.0004	0.00187	0.00033	0.00055	0.0012	0.0013	0.00021	0.00028	0.00062	0.01164	0.0003	0.00078
Tumor Purity	0.74	0.74	0.214	0.214	0.45	0.45	0.276	0.276	0.21	0.21	0.178	0.178	0.372	0.372	0.124	0.124	0.341	0.341	0.403	0.403	0.482	0.482	0.257	0.257	0.354	0.354	0.142	0.142	0.308	0.308	0.73	0.73	0.327	0.327	0.196	0.196	0.656	0.656	0.311	0.311	0.837	0.837	0.395	0.395
Tumor Type	Melanoma		Ovarian Cancer		Adrenal Sebaceous Adenocarcinoma		Small Cell Lung Cancer		Biliary Tract Cancer		Colon Cancer		Non-Small Cell Lung Cancer		Pancreatic Carcinoma		Pancreatic Carcinoma		Colon Cancer		Ovarian Cancer		Breast Cancer		Melanoma		Melanoma		Biliary Tract Cancer		Non-Small Cell Lung Cancer		Melanoma		Parotid carcinoma		Gastric carcinoma		Colon cancer		Non-Small Cell Lung Cancer		Colon cancer
																															P022	Normal	91.66	87629593	115.2	0.9497	0.0061	0.0003	0.395	Colon cancer
																															P022	Tumor	91.56	164179454	221.71	0.9784	0.0058	0.00078	0.395

## Sheet: Supplementary Table S3
Supplementary Table S3. Overview of identified neoantigens for each patient
Patient ID	Neoantigen mutations	Predicted epitopes Class I	Predicted epitopes Class II
P001	345	6785	20078
P002	259	261	215
P003	1622	44793	108816
P004	788	9362	22705
P005	32	315	1022
P006	832	10374	34307
P007	246	4341	6566
P008	210	2846	7803
P009	134	2304	7486
P010	1336	25863	77826
P011	3232	46747	85753
P012	559	8810	18869
P013	141	211	510
P014	633	6548	25383
P015	544	1506	3685
P016	650	10487	28600
P017	128	526	1876
P018	63	628	1645
P019	95	1898	3993
P020	110	1084	4186
P021	1281	19321	38967
P022	344	7460	17120

## Sheet: Supplementary Table S4
Supplementary Table S4. Tumor somatic mutations identified for each patient
Tumor_Sample_Barcode	Hugo_Symbol	NCBI_Build	Chromosome	Start_Position	End_Position	Strand	Variant_Classification	Variant_Type	Reference_Allele	Tumor_Seq_Allele1	Tumor_Seq_Allele2	TxChange	AAChange	Transcript_Id
P001	CYP26B1	hg19	chr2	72371161	72371161	+	Missense_Mutation	SNP	G	G	A	c.C386T	p.T129M	ENST00000001146
P001	CDC27	hg19	chr17	45234430	45234430	+	Missense_Mutation	SNP	A	A	G	c.T691C	p.S231P	ENST00000531206
P001	CDC27	hg19	chr17	45234303	45234303	+	Missense_Mutation	SNP	G	G	C	c.C677G	p.A226G	ENST00000575483
P001	CDC27	hg19	chr17	45214605	45214605	+	Missense_Mutation	SNP	T	T	C	c.A1844G	p.H615R	ENST00000531206
P001	CDC27	hg19	chr17	45214604	45214604	+	Missense_Mutation	SNP	A	A	T	c.T1845A	p.H615Q	ENST00000531206
P001	SLC25A5	hg19	chrX	118603958	118603958	+	Missense_Mutation	SNP	G	G	A	c.G446A	p.G149E	ENST00000317881
P001	DLX2	hg19	chrX	118603962	118603962	+	Frame_Shift_Del	DEL	T	T	-	c.450delT	p.A150fs	ENST00000466293
P001	SLC25A5	hg19	chrX	118603941	118603941	+	Silent	SNP	T	T	C	c.T429C	p.A143A	ENST00000317881
P001	SLC25A5	hg19	chrX	118603929	118603929	+	Silent	SNP	C	C	T	c.C417T	p.T139T	ENST00000317881
P001	SLC25A5	hg19	chrX	118604007	118604007	+	Silent	SNP	C	C	T	c.C495T	p.Y165Y	ENST00000317881
P001	CREBBP	hg19	chr16	3790430	3790430	+	Missense_Mutation	SNP	G	G	A	c.C4103T	p.T1368M	ENST00000262367
P001	CACNA1G	hg19	chr17	48649953	48649953	+	Missense_Mutation	SNP	A	A	G	c.A785G	p.E262G	ENST00000515765
P001	SEMA3G	hg19	chr3	52474451	52474451	+	Missense_Mutation	SNP	C	C	T	c.G1085A	p.G362E	ENST00000231721
P001	PRSS3	hg19	chr9	33794811	33794811	+	Missense_Mutation	SNP	G	G	A	c.G16A	p.G6S	ENST00000457896
P001	WIZ	hg19	chr19	15549942	15549942	+	Intron	SNP	C	C	T	c.G1719A	p.E573E	ENST00000389282
P001	EXTL3	hg19	chr8	28571051	28571051	+	5'UTR	SNP	G	G	T	c.G26T	p.R9M	ENST00000523149
P001	CYP24A1	hg19	chr20	52773750	52773750	+	Missense_Mutation	SNP	G	G	A	c.C1513T	p.R505W	ENST00000216862
P001	OR5K4	hg19	chr6	108214754	108214754	+	Frame_Shift_Ins	INS	-	-	T	c.1605dupA	p.P536fs	ENST00000354924
P001	RANGAP1	hg19	chr2	214012404	214012405	+	Intron	DEL	AA	AA	-	c.184_185del	p.L62fs	ENST00000405486
P001	ALG1	hg19	chr16	5134779	5134779	+	Missense_Mutation	SNP	C	C	A	c.C959A	p.A320E	ENST00000588623
P001	MSR1	hg19	chr8	15978098	15978098	+	Silent	SNP	G	G	T	c.C1105A	p.R369R	ENST00000445506
P001	WDR37	hg19	chr10	1132288	1132288	+	Missense_Mutation	SNP	G	G	A	c.G595A	p.V199M	ENST00000381329
P001	ARID1B	hg19	chr6	157511195	157511195	+	Missense_Mutation	SNP	A	A	G	c.A3833G	p.D1278G	ENST00000367148
P001	LY75	hg19	chr2	160755449	160755449	+	Silent	SNP	C	C	T	c.G216A	p.Q72Q	ENST00000554112
P001	PLEKHH1	hg19	chr14	68029459	68029459	+	Missense_Mutation	SNP	C	C	T	c.C1111T	p.R371W	ENST00000329153
P001	USP36	hg19	chr17	76823312	76823312	+	Intron	SNP	T	T	G	c.A704C	p.H235P	ENST00000590546
P001	KMT2C	hg19	chr7	151933014	151933014	+	Missense_Mutation	SNP	C	C	T	c.G2657A	p.R886H	ENST00000355193
P001	CNN2	hg19	chr19	1037871	1037871	+	Missense_Mutation	SNP	C	C	A	c.C869A	p.P290H	ENST00000565096
P001	ZBTB4	hg19	chr2	197943383	197943384	+	Intron	DEL	TG	TG	-	c.1693_1694del	p.H565fs	ENST00000380599
P001	MYLK	hg19	chr3	123471190	123471190	+	Silent	SNP	A	A	G	c.T361C	p.L121L	ENST00000360772
P001	MYLK	hg19	chr3	123419848	123419848	+	Missense_Mutation	SNP	T	T	C	c.A2467G	p.R823G	ENST00000360772
P001	MICAL3	hg19	chr12	8200558	8200560	+	In_Frame_Del	DEL	CAG	CAG	-	c.898_900del	p.300_300del	ENST00000441493
P001	NFYC	hg19	chr1	41236078	41236078	+	Intron	SNP	G	G	A	c.G898A	p.V300M	ENST00000372652
P001	MSANTD3	hg19	chr9	103204584	103204584	+	Missense_Mutation	SNP	C	C	A	c.C364A	p.L122M	ENST00000398977
P001	TCOF1	hg19	chr2	231334504	231334508	+	Intron	DEL	AAAAG	AAAAG	-	c.1358_1362del	p.K453fs	ENST00000451292
P001	TP53BP1	hg19	chr15	43748259	43748259	+	Silent	SNP	T	T	C	c.A2547G	p.L849L	ENST00000450115
P001	EIF2B3	hg19	chr1	45407265	45407265	+	Missense_Mutation	SNP	C	C	T	c.G367A	p.A123T	ENST00000372183
P001	DIAPH1	hg19	chr5	149776147	149776149	+	In_Frame_Del	DEL	AAG	AAG	-	c.4195_4197del	p.1399_1399del	ENST00000398557
P001	STK10	hg19	chr5	171583792	171583792	+	Missense_Mutation	SNP	C	C	T	c.G157A	p.A53T	ENST00000176763
P001	TP63	hg19	chr3	189584486	189584486	+	Missense_Mutation	SNP	C	C	T	c.C782T	p.P261L	ENST00000440651
P001	PDE8A	hg19	chr15	85657128	85657128	+	Nonsense_Mutation	SNP	C	C	T	c.C1210T	p.Q404X	ENST00000310298
P001	FRY	hg19	chr13	32799943	32799943	+	Missense_Mutation	SNP	C	C	A	c.C5038A	p.P1680T	ENST00000380250
P001	FRY	hg19	chr13	32799935	32799935	+	Missense_Mutation	SNP	A	A	C	c.A5030C	p.H1677P	ENST00000380250
P001	CACNA1E	hg19	chr1	17944985	17944987	+	Intron	DEL	CCT	CCT	-	c.137_139del	p.46_47del	ENST00000524607
P001	WSCD2	hg19	chr12	108634276	108634276	+	Missense_Mutation	SNP	G	G	A	c.G1300A	p.G434S	ENST00000332082
P001	VPS9D1	hg19	chr16	89775663	89775663	+	Silent	SNP	G	G	A	c.C1569T	p.S523S	ENST00000389386
P001	NT5C2	hg19	chr10	104934709	104934709	+	Missense_Mutation	SNP	T	T	C	c.A7G	p.T3A	ENST00000470299
P001	TM9SF3	hg19	chr10	98290353	98290353	+	Silent	SNP	A	A	G	c.T1338C	p.P446P	ENST00000371142
P001	DYNC1I2	hg19	chr2	172546760	172546760	+	Missense_Mutation	SNP	G	G	T	c.G95T	p.R32M	ENST00000430778
P001	FGFR1	hg19	chr8	38271461	38271461	+	Missense_Mutation	SNP	C	C	T	c.G2360A	p.R787H	ENST00000425967
P001	NEBL	hg19	chr10	21148698	21148698	+	Missense_Mutation	SNP	G	G	T	c.C742A	p.P248T	ENST00000377122
P001	ADCY2	hg19	chr5	7520985	7520985	+	Silent	SNP	G	G	A	c.G543A	p.P181P	ENST00000338316
P001	DNM2	hg19	chr19	10941678	10941678	+	Silent	SNP	C	C	T	c.C2565T	p.S855S	ENST00000585892
P001	CNOT4	hg19	chr7	135047721	135047721	+	Silent	SNP	T	T	G	c.A2058C	p.P686P	ENST00000541284
P001	LRP2	hg19	chr2	170077027	170077027	+	Missense_Mutation	SNP	G	G	A	c.C5585T	p.A1862V	ENST00000263816
P001	TMEM97	hg19	chr5	140502486	140502486	+	Frame_Shift_Ins	INS	-	-	A	c.907dupA	p.L302fs	ENST00000583381
P001	REST	hg19	chr4	57777566	57777566	+	Silent	SNP	A	A	G	c.A762G	p.T254T	ENST00000309042
P001	APOB	hg19	chr2	21241907	21241907	+	Missense_Mutation	SNP	G	G	C	c.C3078G	p.D1026E	ENST00000233242
P001	MAML3	hg19	chr19	16640581	16640583	+	In_Frame_Del	DEL	TGC	TGC	-	c.1005_1007del	p.335_336del	ENST00000509479
P001	USP40	hg19	chr2	234474223	234474223	+	Nonsense_Mutation	SNP	A	A	T	c.T14A	p.L5X	ENST00000450966
P001	ADAMTS2	hg19	chr5	178552114	178552114	+	Missense_Mutation	SNP	C	C	T	c.G2818A	p.V940M	ENST00000251582
P001	ANAPC5	hg19	chr12	121756216	121756216	+	Missense_Mutation	SNP	G	G	T	c.C1718A	p.S573Y	ENST00000541887
P001	PXN	hg19	chr12	120662041	120662041	+	Missense_Mutation	SNP	T	T	G	c.A238C	p.T80P	ENST00000547983
P001	KCNH4	hg19	chr17	40318558	40318558	+	Missense_Mutation	SNP	G	G	A	c.C1597T	p.R533C	ENST00000607371
P001	ZFHX4	hg19	chr8	77768496	77768496	+	Missense_Mutation	SNP	C	C	G	c.C9339G	p.N3113K	ENST00000521891
P001	ZFHX4	hg19	chr8	77618333	77618333	+	Silent	SNP	G	G	C	c.G2010C	p.P670P	ENST00000521891
P001	ZFHX4	hg19	chr8	77765278	77765278	+	Missense_Mutation	SNP	A	A	C	c.A6121C	p.T2041P	ENST00000521891
P001	DKC1	hg19	chr3	112328933	112328933	+	Intron	DEL	A	A	-	c.151delT	p.S51fs	ENST00000369550
P001	RNF31	hg19	chr14	24617590	24617590	+	Silent	SNP	C	C	T	c.C463T	p.L155L	ENST00000557991
P001	SUCO	hg19	chr1	172539201	172539201	+	Missense_Mutation	SNP	G	G	A	c.G1348A	p.A450T	ENST00000608151
P001	PCSK5	hg19	chr9	78936400	78936400	+	Missense_Mutation	SNP	G	G	T	c.G3866T	p.G1289V	ENST00000545128
P001	FBXL19	hg19	chr16	30938689	30938689	+	Missense_Mutation	SNP	G	G	T	c.G238T	p.V80L	ENST00000562319
P001	ZFC3H1	hg19	chr19	1236047	1236049	+	In_Frame_Del	DEL	GTG	GTG	-	c.51_53del	p.17_18del	ENST00000552994
P001	2020-03-02	hg19	chr19	8495590	8495590	+	Missense_Mutation	SNP	G	G	A	c.G421A	p.D141N	ENST00000393944
P001	MKNK2	hg19	chr19	2037799	2037799	+	Missense_Mutation	SNP	T	T	G	c.A1184C	p.H395P	ENST00000309340
P001	MFNG	hg19	chr22	37872937	37872937	+	Missense_Mutation	SNP	G	G	A	c.C278T	p.A93V	ENST00000436341
P001	TRIOBP	hg19	chr22	38120626	38120626	+	Missense_Mutation	SNP	G	G	A	c.G2063A	p.S688N	ENST00000406386
P001	TTC28	hg19	chr22	28501622	28501622	+	Silent	SNP	C	C	T	c.G2952A	p.L984L	ENST00000397906
P001	SLC5A1	hg19	chr22	32506051	32506051	+	Missense_Mutation	SNP	G	G	A	c.G1846A	p.G616S	ENST00000266088
P001	TREML2	hg19	chr22	41650469	41650471	+	In_Frame_Del	DEL	TCC	TCC	-	c.1101_1103del	p.367_368del	ENST00000483722
P001	ARHGAP5	hg19	chr14	32561340	32561340	+	Missense_Mutation	SNP	G	G	A	c.G1465A	p.E489K	ENST00000556611
P001	SIRPB1	hg19	chr20	1592175	1592175	+	Silent	SNP	T	T	G	c.A261C	p.P87P	ENST00000568365
P001	KIF3B	hg19	chr20	30898750	30898750	+	Silent	SNP	T	T	G	c.T1170G	p.G390G	ENST00000375712
P001	SRPK2	hg19	chr18	20572852	20572852	+	Frame_Shift_Ins	INS	-	-	A	c.1063dupA	p.G354fs	ENST00000465112
P001	DRP2	hg19	chrX	100513360	100513360	+	Missense_Mutation	SNP	G	G	T	c.G2453T	p.S818I	ENST00000402866
P001	ZNF423	hg19	chr16	49669805	49669805	+	Silent	SNP	C	C	T	c.G3258A	p.G1086G	ENST00000262383
P001	MMP15	hg19	chr16	58076240	58076240	+	Missense_Mutation	SNP	G	G	A	c.G1270A	p.E424K	ENST00000219271
P001	SLC38A7	hg19	chr16	58705026	58705026	+	Missense_Mutation	SNP	G	G	A	c.C887T	p.A296V	ENST00000564010
P001	GOLGA6L2	hg19	chr16	88789666	88789666	+	In_Frame_Ins	INS	-	-	CCTGCT	c.4405_4406insAGCAGG	p.A1469delinsEQA	ENST00000567107
P001	KIF21A	hg19	chr8	11162508	11162508	+	Frame_Shift_Ins	INS	-	-	A	c.322dupA	p.H107fs	ENST00000361418
P001	CCDC130	hg19	chr19	13869970	13869970	+	Nonsense_Mutation	SNP	G	G	T	c.G457T	p.E153X	ENST00000586600
P001	HOXA6	hg19	chr7	27187273	27187273	+	Silent	SNP	A	A	G	c.T96C	p.Y32Y	ENST00000222728
P001	CCDC168	hg19	chr7	142562052	142562054	+	In_Frame_Del	DEL	CCT	CCT	-	c.494_496del	p.165_166del	ENST00000322527
P001	RBM28	hg19	chr7	127981201	127981201	+	Intron	SNP	G	G	A	c.C191T	p.A64V	ENST00000459726
P001	MED12	hg19	chr7	39379288	39379290	+	In_Frame_Del	DEL	CAG	CAG	-	c.559_561del	p.187_187del	ENST00000374102
P001	LHX6	hg19	chr9	124979358	124979358	+	Missense_Mutation	SNP	G	G	A	c.C638T	p.A213V	ENST00000541397
P001	GDF10	hg19	chr10	48438474	48438474	+	Missense_Mutation	SNP	C	C	T	c.G237A	p.M79I	ENST00000224605
P001	SMC3	hg19	chr10	112343147	112343147	+	Silent	SNP	C	C	T	c.C810T	p.I270I	ENST00000361804
P001	GIT1	hg19	chr17	27908844	27908844	+	Missense_Mutation	SNP	G	G	A	c.C634T	p.H212Y	ENST00000581348
P001	MLLT6	hg19	chr17	36876961	36876961	+	Silent	SNP	C	C	T	c.C2403T	p.S801S	ENST00000325718
P001	SYNGR2	hg19	chr17	76166939	76166939	+	Silent	SNP	C	C	G	c.C141G	p.G47G	ENST00000588282
P001	ULK4	hg19	chr17	26653806	26653806	+	Frame_Shift_Ins	INS	-	-	A	c.198dupA	p.R66fs	ENST00000301831
P001	ATXN1	hg19	chr4	141677078	141677080	+	In_Frame_Del	DEL	CCG	CCG	-	c.120_122del	p.40_41del	ENST00000244769
P001	FRG1	hg19	chr4	190876293	190876293	+	Missense_Mutation	SNP	C	C	A	c.C230A	p.P77Q	ENST00000531991
P001	FRG1	hg19	chr4	190876287	190876287	+	Nonsense_Mutation	SNP	G	G	A	c.G224A	p.W75X	ENST00000531991
P001	FRG1	hg19	chr4	190876269	190876269	+	Missense_Mutation	SNP	T	T	C	c.T206C	p.I69T	ENST00000531991
P001	FRG1	hg19	chr4	190876268	190876268	+	Missense_Mutation	SNP	A	A	G	c.A205G	p.I69V	ENST00000531991
P001	RAPGEF2	hg19	chr4	160274695	160274695	+	Missense_Mutation	SNP	C	C	A	c.C3665A	p.S1222Y	ENST00000264431
P001	PPP6R3	hg19	chr11	68334512	68334512	+	Silent	SNP	C	C	T	c.C1006T	p.L336L	ENST00000524904
P001	FOLR1	hg19	chr11	71907098	71907098	+	Silent	SNP	C	C	A	c.C651A	p.A217A	ENST00000393681
P001	FOLR1	hg19	chr11	71907118	71907118	+	Missense_Mutation	SNP	A	A	T	c.A671T	p.E224V	ENST00000393681
P001	EXPH5	hg19	chr11	108380508	108380508	+	Missense_Mutation	SNP	C	C	T	c.G5705A	p.R1902K	ENST00000525344
P001	ASIC1	hg19	chr12	50467985	50467985	+	Silent	SNP	C	C	T	c.C618T	p.C206C	ENST00000552438
P001	DUSP16	hg19	chr12	12630307	12630307	+	Silent	SNP	C	C	A	c.G1458T	p.S486S	ENST00000228862
P001	ACAD10	hg19	chr12	112191639	112191639	+	Missense_Mutation	SNP	G	G	A	c.G2974A	p.A992T	ENST00000455480
P001	EIF2B1	hg19	chr12	124115018	124115018	+	Missense_Mutation	SNP	C	C	T	c.G178A	p.D60N	ENST00000537073
P001	AXIN2	hg19	chr6	41168714	41168716	+	In_Frame_Del	DEL	CAG	CAG	-	c.31_33del	p.11_11del	ENST00000307078
P001	HBS1L	hg19	chr6	135307258	135307258	+	Missense_Mutation	SNP	G	G	T	c.C1369A	p.Q457K	ENST00000367837
P001	TBP	hg19	chr6	170871070	170871070	+	Silent	SNP	G	G	A	c.G246A	p.Q82Q	ENST00000423353
P001	TBP	hg19	chr6	170871064	170871064	+	Silent	SNP	G	G	A	c.G240A	p.Q80Q	ENST00000423353
P001	DUSP22	hg19	chr6	304635	304635	+	Missense_Mutation	SNP	C	C	T	c.C29T	p.P10L	ENST00000603795
P001	TTK	hg19	chr6	80749965	80749965	+	Missense_Mutation	SNP	C	C	T	c.C2357T	p.A786V	ENST00000509894
P001	TTK	hg19	chr6	80749964	80749964	+	Missense_Mutation	SNP	G	G	A	c.G2356A	p.A786T	ENST00000509894
P001	TTK	hg19	chr6	80737687	80737687	+	Nonsense_Mutation	SNP	C	C	T	c.C1477T	p.Q493X	ENST00000509894
P001	GRM6	hg19	chr5	178413726	178413726	+	Missense_Mutation	SNP	G	G	T	c.C1529A	p.P510H	ENST00000517717
P001	PRLR	hg19	chr5	35068932	35068932	+	Missense_Mutation	SNP	G	G	T	c.C734A	p.S245Y	ENST00000382002
P001	KIAA1217	hg19	chr3	48625812	48625812	+	Frame_Shift_Del	DEL	C	C	-	c.2613delG	p.G871fs	ENST00000376462
P001	CYB561D2	hg19	chr3	50390810	50390810	+	Missense_Mutation	SNP	G	G	T	c.G304T	p.G102C	ENST00000425346
P001	DNAH1	hg19	chr3	52366268	52366268	+	Missense_Mutation	SNP	C	C	T	c.C1144T	p.R382C	ENST00000420323
P001	ARHGEF10L	hg19	chr2	220502413	220502413	+	Frame_Shift_Del	DEL	C	C	-	c.2727delC	p.G909fs	ENST00000375408
P001	OTOF	hg19	chr2	26703177	26703177	+	Silent	SNP	G	G	A	c.C1806T	p.S602S	ENST00000403946
P001	GPD2	hg19	chr2	157406134	157406134	+	Missense_Mutation	SNP	G	G	A	c.G676A	p.A226T	ENST00000540309
P001	LOXL3	hg19	chr2	74763594	74763594	+	Missense_Mutation	SNP	C	C	T	c.G917A	p.R306H	ENST00000264094
P001	PLEKHB2	hg19	chr2	132110862	132110862	+	IGR	SNP	G	G	C	c.G693C	p.P231P	ENST00000404460
P001	SKIDA1	hg19	chr2	172967129	172967131	+	In_Frame_Del	DEL	GCT	GCT	-	c.136_138del	p.46_46del	ENST00000449193
P001	SEC63	hg19	chr1	147091500	147091500	+	Frame_Shift_Ins	INS	-	-	C	c.1540dupC	p.G513fs	ENST00000369002
P001	TNR	hg19	chr1	175334304	175334304	+	Missense_Mutation	SNP	G	G	T	c.C2429A	p.P810H	ENST00000263525
P001	RBM33	hg19	chr1	29475219	29475221	+	In_Frame_Del	DEL	CTT	CTT	-	c.1186_1188del	p.396_396del	ENST00000401878
P001	PRG4	hg19	chr1	186276285	186276285	+	Silent	SNP	T	T	C	c.T1434C	p.T478T	ENST00000445192
P001	CFHR3	hg19	chr1	196759282	196759282	+	Missense_Mutation	SNP	C	C	T	c.C721T	p.P241S	ENST00000367425
P001	CFHR3	hg19	chr1	196759347	196759347	+	Silent	SNP	A	A	T	c.A786T	p.P262P	ENST00000367425
P001	KIF17	hg19	chr1	21011334	21011334	+	Silent	SNP	C	C	T	c.G2199A	p.L733L	ENST00000400463
P001	DARS2	hg19	chr1	173795839	173795839	+	Missense_Mutation	SNP	G	G	T	c.G142T	p.V48F	ENST00000361951
P001	CPXM2	hg19	chr19	45912490	45912492	+	In_Frame_Del	DEL	AAG	AAG	-	c.1270_1272del	p.424_424del	ENST00000241305
P001	AC020629.1	hg19	chr19	47978708	47978708	+	Frame_Shift_Del	DEL	C	C	-	c.556delG	p.A186fs	ENST00000601185
P001	ATP2A1	hg19	chr6	108985176	108985176	+	Frame_Shift_Ins	INS	-	-	G	c.1141dupG	p.D380fs	ENST00000395503
P001	GAL3ST2	hg19	chr10	24822125	24822127	+	In_Frame_Del	DEL	GAA	GAA	-	c.3133_3135del	p.1045_1045del	ENST00000192314
P001	TBX4	hg19	chr17	59534987	59534987	+	Silent	SNP	T	T	G	c.T18G	p.A6A	ENST00000589003
P001	TBC1D15	hg19	chr12	72311502	72311502	+	Missense_Mutation	SNP	C	C	G	c.C1477G	p.Q493E	ENST00000550746
P001	CPXM2	hg19	chr10	125601974	125601974	+	Missense_Mutation	SNP	C	C	G	c.G544C	p.G182R	ENST00000241305
P001	ARIH2	hg19	chr10	125526603	125526605	+	In_Frame_Del	DEL	GTT	GTT	-	c.1363_1365del	p.455_455del	ENST00000449729
P001	SRSF4	hg19	chrX	128890518	128890518	+	Frame_Shift_Del	DEL	G	G	-	c.1354delG	p.G452fs	ENST00000373795
P001	NBPF14	hg19	chr1	148010910	148010910	+	Missense_Mutation	SNP	C	C	T	c.G1712A	p.R571H	ENST00000369219
P001	NBPF14	hg19	chr1	148010915	148010915	+	Silent	SNP	T	T	C	c.A1707G	p.Q569Q	ENST00000369219
P001	NBPF14	hg19	chr1	148004749	148004749	+	Intron	SNP	C	C	T	c.G2565A	p.L855L	ENST00000369219
P001	WIPF3	hg19	chr7	29874364	29874364	+	Silent	SNP	A	A	C	c.A24C	p.P8P	ENST00000409123
P001	CHPF	hg19	chr2	220405239	220405239	+	Silent	SNP	C	C	T	c.G708A	p.T236T	ENST00000535926
P001	BCAS4	hg19	chr20	49411636	49411636	+	Missense_Mutation	SNP	G	G	A	c.G16A	p.A6T	ENST00000609336
P001	LYPD3	hg19	chr19	43969654	43969654	+	Missense_Mutation	SNP	G	G	A	c.C70T	p.L24F	ENST00000244333
P001	NQO2	hg19	chr6	3012840	3012840	+	Missense_Mutation	SNP	A	A	G	c.A235G	p.R79G	ENST00000338130
P001	KCNN3	hg19	chr6	16327907	16327909	+	In_Frame_Del	DEL	TGA	TGA	-	c.633_635del	p.211_212del	ENST00000271915
P001	AHNAK	hg19	chr11	62284394	62284394	+	Missense_Mutation	SNP	C	C	G	c.G17495C	p.S5832T	ENST00000378024
P001	RRBP1	hg19	chr20	17639738	17639738	+	Intron	SNP	A	A	G	c.T1415C	p.V472A	ENST00000377813
P001	GPR42	hg19	chr19	35863298	35863298	+	IGR	SNP	A	A	G	c.A1037G	p.N346S	ENST00000454971
P001	NXF5	hg19	chrX	101095567	101095567	+	Nonsense_Mutation	SNP	C	C	T	c.G602A	p.W201X	ENST00000537026
P001	TAS2R5	hg19	chr7	141490815	141490815	+	Silent	SNP	C	C	T	c.C654T	p.I218I	ENST00000247883
P001	CD3EAP	hg19	chr19	4817289	4817291	+	In_Frame_Del	DEL	AGG	AGG	-	c.1099_1101del	p.367_367del	ENST00000589804
P001	HERC2	hg19	chr15	28518046	28518046	+	Missense_Mutation	SNP	G	G	A	c.C905T	p.T302M	ENST00000261609
P001	PPP1CB	hg19	chrX	23802146	23802146	+	Intron	INS	-	-	A	c.349dupA	p.R116fs	ENST00000418910
P001	PNPLA7	hg19	chr9	140437192	140437192	+	Nonsense_Mutation	SNP	G	G	A	c.C568T	p.Q190X	ENST00000406427
P001	PRRC2B	hg19	chr9	134342980	134342980	+	Missense_Mutation	SNP	C	C	T	c.C1751T	p.P584L	ENST00000405995
P001	YIPF2	hg19	chr19	11034851	11034851	+	Missense_Mutation	SNP	C	C	T	c.G385A	p.A129T	ENST00000586748
P001	CCDC62	hg19	chr12	123285708	123285708	+	Missense_Mutation	SNP	C	C	T	c.C1015T	p.P339S	ENST00000392441
P001	DNMT1	hg19	chr19	10250935	10250935	+	Missense_Mutation	SNP	G	G	A	c.C3593T	p.P1198L	ENST00000359526
P001	FREM2	hg19	chrX	154005089	154005091	+	In_Frame_Del	DEL	AAG	AAG	-	c.1492_1494del	p.498_498del	ENST00000280481
P001	PKDREJ	hg19	chr22	46656146	46656146	+	Missense_Mutation	SNP	A	A	G	c.T3074C	p.V1025A	ENST00000253255
P001	NUTM2F	hg19	chr9	97080947	97080947	+	Missense_Mutation	SNP	A	A	G	c.T2026C	p.S676P	ENST00000341207
P001	GFAP	hg19	chr17	42989043	42989043	+	Silent	SNP	G	G	C	c.C171G	p.G57G	ENST00000588957
P001	COL6A3	hg19	chr5	140953564	140953566	+	In_Frame_Del	DEL	GGA	GGA	-	c.1851_1853del	p.617_618del	ENST00000295550
P001	GAS2L2	hg19	chr17	34072791	34072791	+	Silent	SNP	G	G	A	c.C1677T	p.S559S	ENST00000587565
P001	MTSS1L	hg19	chr16	70697896	70697896	+	Missense_Mutation	SNP	G	G	T	c.C1928A	p.T643K	ENST00000338779
P001	TPTE2	hg19	chr13	19999107	19999107	+	Silent	SNP	C	C	T	c.G1446A	p.T482T	ENST00000382977
P001	TPTE2	hg19	chr13	19999130	19999130	+	Missense_Mutation	SNP	G	G	A	c.C1423T	p.P475S	ENST00000382977
P001	RXFP2	hg19	chr13	32313784	32313784	+	Missense_Mutation	SNP	G	G	C	c.G35C	p.S12T	ENST00000380314
P001	GIMAP6	hg19	chr7	150324934	150324934	+	Missense_Mutation	SNP	C	C	A	c.G752T	p.R251M	ENST00000328902
P001	CHERP	hg19	chr12	72007127	72007127	+	Frame_Shift_Del	DEL	C	C	-	c.5615delG	p.G1872fs	ENST00000546361
P001	UNC79	hg19	chr14	94048665	94048665	+	Silent	SNP	C	C	T	c.C2778T	p.N926N	ENST00000555664
P001	FHOD3	hg19	chr18	34298366	34298366	+	Silent	SNP	A	A	C	c.A3105C	p.P1035P	ENST00000590592
P001	POM121C	hg19	chr7	75052281	75052281	+	Silent	SNP	T	T	C	c.A1254G	p.Q418Q	ENST00000453279
P001	PLA2G4E	hg19	chr7	104946931	104946931	+	Intron	INS	-	-	A	c.158dupT	p.L53fs	ENST00000413860
P001	ATXN7L1	hg19	chr7	114562639	114562641	+	In_Frame_Del	DEL	GAG	GAG	-	c.168_170del	p.56_57del	ENST00000419735
P001	ZC3H10	hg19	chr12	56515408	56515408	+	Silent	SNP	A	A	C	c.A1062C	p.P354P	ENST00000257940
P001	TEC	hg19	chr4	48158712	48158712	+	Silent	SNP	T	T	C	c.A777G	p.Q259Q	ENST00000381501
P001	IRX6	hg19	chr16	67300017	67300019	+	In_Frame_Del	DEL	GAG	GAG	-	c.2107_2109del	p.703_703del	ENST00000290552
P001	KCNK1	hg19	chr1	233807205	233807205	+	Missense_Mutation	SNP	G	G	T	c.G592T	p.D198Y	ENST00000366620
P001	LAMC1	hg19	chr1	183106957	183106957	+	Missense_Mutation	SNP	G	G	A	c.G4468A	p.G1490R	ENST00000258341
P001	ANKRD36	hg19	chr2	97845609	97845609	+	Silent	SNP	C	C	T	c.C1674T	p.D558D	ENST00000461153
P001	ANKRD36	hg19	chr2	97845612	97845612	+	Missense_Mutation	SNP	C	C	G	c.C1677G	p.D559E	ENST00000461153
P001	ANKRD36	hg19	chr2	97845607	97845607	+	Missense_Mutation	SNP	G	G	A	c.G1672A	p.D558N	ENST00000461153
P001	ANKRD36	hg19	chr2	97873681	97873681	+	Missense_Mutation	SNP	C	C	A	c.C3203A	p.A1068D	ENST00000461153
P001	ANKRD36	hg19	chr2	97915896	97915896	+	Missense_Mutation	SNP	G	G	A	c.G5818A	p.E1940K	ENST00000461153
P001	FLNB	hg19	chr3	58094257	58094257	+	Missense_Mutation	SNP	C	C	T	c.C2014T	p.P672S	ENST00000490882
P001	ADAMTS7	hg19	chr15	79058307	79058307	+	Missense_Mutation	SNP	A	A	T	c.T3946A	p.S1316T	ENST00000388820
P001	ADAMTS7	hg19	chr15	79058317	79058317	+	Silent	SNP	C	C	T	c.G3936A	p.P1312P	ENST00000388820
P001	IL36B	hg19	chr2	113780257	113780257	+	Silent	SNP	C	C	T	c.G489A	p.R163R	ENST00000259213
P001	HS6ST1	hg19	chr2	129026421	129026421	+	Missense_Mutation	SNP	A	A	G	c.T551C	p.L184P	ENST00000259241
P001	TMEM14B	hg19	chr6	10756728	10756728	+	Missense_Mutation	SNP	C	C	T	c.C322T	p.R108C	ENST00000379542
P001	HMGA1	hg19	chr6	34212760	34212760	+	3'UTR	SNP	A	A	C	c.A355C	p.T119P	ENST00000395004
P001	MYO7A	hg19	chr11	76900480	76900480	+	Missense_Mutation	SNP	G	G	T	c.G3562T	p.V1188L	ENST00000409619
P001	SORL1	hg19	chr11	121457001	121457001	+	Silent	SNP	G	G	A	c.G3777A	p.L1259L	ENST00000260197
P001	SLC28A2	hg19	chr15	45564558	45564558	+	Missense_Mutation	SNP	G	G	T	c.G1714T	p.A572S	ENST00000347644
P001	SLC44A5	hg19	chr1	75684270	75684270	+	Silent	SNP	G	G	A	c.C1434T	p.A478A	ENST00000370859
P001	USP8	hg19	chr15	50784955	50784955	+	Missense_Mutation	SNP	C	C	A	c.C2292A	p.N764K	ENST00000433963
P001	USP8	hg19	chr15	50784950	50784950	+	Missense_Mutation	SNP	C	C	T	c.C2287T	p.R763W	ENST00000433963
P001	HCN4	hg19	chr15	73616161	73616161	+	Missense_Mutation	SNP	C	C	T	c.G2273A	p.R758H	ENST00000261917
P001	AP1AR	hg19	chr4	113175926	113175926	+	Silent	SNP	T	T	C	c.T156C	p.D52D	ENST00000309703
P001	DENND4B	hg19	chr4	79792083	79792085	+	In_Frame_Del	DEL	CAG	CAG	-	c.1378_1380del	p.460_460del	ENST00000368646
P001	CACNA1C	hg19	chr12	39713783	39713783	+	Frame_Shift_Ins	INS	-	-	T	c.3703dupA	p.I1235fs	ENST00000480911
P001	SAT1	hg19	chr13	53216736	53216736	+	Frame_Shift_Ins	INS	-	-	G	c.110dupG	p.W37fs	ENST00000379253
P001	RBBP8	hg19	chr13	79918806	79918806	+	Frame_Shift_Ins	INS	-	-	T	c.2181dupA	p.Q728fs	ENST00000399725
P001	PCSK6	hg19	chr15	101865212	101865212	+	Silent	SNP	G	G	A	c.C2217T	p.D739D	ENST00000348070
P001	ZFHX3	hg19	chr16	72831840	72831840	+	Missense_Mutation	SNP	C	C	A	c.G4741T	p.A1581S	ENST00000268489
P001	CDH13	hg19	chr16	83813604	83813604	+	Silent	SNP	G	G	A	c.G1854A	p.L618L	ENST00000268613
P001	ABCA8	hg19	chr17	66920910	66920910	+	Missense_Mutation	SNP	A	A	C	c.T1374G	p.D458E	ENST00000586539
P001	TRIM65	hg19	chr17	73887378	73887378	+	Silent	SNP	G	G	A	c.C1036T	p.L346L	ENST00000269383
P001	AZI1	hg19	chr17	79163569	79163569	+	Nonstop_Mutation	SNP	T	T	C	c.A3243G	p.X1081W	ENST00000450824
P001	BRD4	hg19	chr19	15350794	15350794	+	Missense_Mutation	SNP	G	G	T	c.C3209A	p.S1070Y	ENST00000263377
P001	IFNAR1	hg19	chr21	34727650	34727650	+	Missense_Mutation	SNP	T	T	C	c.T1286C	p.L429P	ENST00000442357
P001	TRPM2	hg19	chr21	45826638	45826638	+	Silent	SNP	C	C	T	c.C2952T	p.G984G	ENST00000300482
P001	URB1	hg19	chr21	33709439	33709439	+	Missense_Mutation	SNP	G	G	A	c.C4649T	p.A1550V	ENST00000382751
P001	NLRP12	hg19	chr19	54313648	54313648	+	Missense_Mutation	SNP	C	C	G	c.G1265C	p.G422A	ENST00000535162
P001	ZNF473	hg19	chr19	50549284	50549284	+	Silent	SNP	A	A	T	c.A1584T	p.S528S	ENST00000595661
P001	RERE	hg19	chr1	8716264	8716264	+	Silent	SNP	C	C	T	c.G93A	p.E31E	ENST00000337907
P001	CELA3A	hg19	chr1	22329543	22329543	+	Missense_Mutation	SNP	C	C	A	c.C91A	p.H31N	ENST00000374663
P001	CELA3A	hg19	chr1	22329525	22329525	+	Missense_Mutation	SNP	T	T	C	c.T73C	p.S25P	ENST00000374663
P001	CELA3A	hg19	chr1	22329523	22329523	+	Missense_Mutation	SNP	A	A	G	c.A71G	p.H24R	ENST00000374663
P001	KIF2C	hg19	chr1	45223235	45223235	+	Missense_Mutation	SNP	G	G	C	c.G985C	p.A329P	ENST00000372224
P001	RFWD2	hg19	chr1	176054912	176054912	+	Missense_Mutation	SNP	C	C	G	c.G1141C	p.D381H	ENST00000367669
P001	PVRL4	hg19	chr1	161042611	161042611	+	Missense_Mutation	SNP	G	G	A	c.C1373T	p.T458I	ENST00000368012
P001	PRCC	hg19	chr1	156737728	156737728	+	Silent	SNP	T	T	C	c.T165C	p.P55P	ENST00000353233
P001	SP100	hg19	chr1	154842331	154842333	+	In_Frame_Del	DEL	TGC	TGC	-	c.108_110del	p.36_37del	ENST00000341950
P001	FLG	hg19	chr1	152278049	152278049	+	Missense_Mutation	SNP	A	A	C	c.T9313G	p.Y3105D	ENST00000368799
P001	FLG	hg19	chr1	152284806	152284806	+	Silent	SNP	C	C	T	c.G2556A	p.R852R	ENST00000368799
P001	FLG	hg19	chr1	152280691	152280691	+	Missense_Mutation	SNP	A	A	T	c.T6671A	p.L2224Q	ENST00000368799
P001	FLG	hg19	chr1	152277690	152277690	+	Silent	SNP	A	A	G	c.T9672C	p.H3224H	ENST00000368799
P001	FLG	hg19	chr1	152277671	152277671	+	Missense_Mutation	SNP	A	A	G	c.T9691C	p.W3231R	ENST00000368799
P001	FLG	hg19	chr1	152277698	152277698	+	Missense_Mutation	SNP	C	C	G	c.G9664C	p.E3222Q	ENST00000368799
P001	FLG	hg19	chr1	152280614	152280614	+	Missense_Mutation	SNP	C	C	G	c.G6748C	p.E2250Q	ENST00000368799
P001	MLK4	hg19	chr1	233490616	233490616	+	Silent	SNP	G	G	A	c.G1170A	p.S390S	ENST00000366624
P001	MEIS1	hg19	chr2	66667062	66667062	+	Silent	SNP	G	G	A	c.G327A	p.G109G	ENST00000560281
P001	ILDR1	hg19	chr3	121712214	121712214	+	Missense_Mutation	SNP	C	C	T	c.G1382A	p.R461K	ENST00000344209
P001	ECE2	hg19	chr3	184007302	184007302	+	Silent	SNP	C	C	T	c.C1452T	p.T484T	ENST00000404464
P001	CISD2	hg19	chr4	103808572	103808572	+	Silent	SNP	G	G	A	c.G423A	p.K141K	ENST00000503643
P001	CISD2	hg19	chr4	103808519	103808519	+	Missense_Mutation	SNP	C	C	T	c.C370T	p.H124Y	ENST00000503643
P001	ATG12	hg19	chr5	115173396	115173396	+	Missense_Mutation	SNP	G	G	C	c.C229G	p.R77G	ENST00000509910
P001	TRIM41	hg19	chr5	180659684	180659684	+	Missense_Mutation	SNP	C	C	T	c.C65T	p.A22V	ENST00000515499
P001	ANO7	hg19	chr2	242151595	242151595	+	Missense_Mutation	SNP	G	G	A	c.G1807A	p.V603I	ENST00000402430
P001	CCT6A	hg19	chr7	56124084	56124084	+	Silent	SNP	A	A	G	c.A498G	p.K166K	ENST00000540286
P001	PSPH	hg19	chr7	56088902	56088902	+	Missense_Mutation	SNP	C	C	T	c.G4A	p.V2I	ENST00000419984
P001	TBC1D9	hg19	chr7	105254802	105254804	+	In_Frame_Del	DEL	GAG	GAG	-	c.1977_1979del	p.659_660del	ENST00000442267
P001	ZAN	hg19	chr7	100350095	100350095	+	Silent	SNP	T	T	C	c.T2367C	p.I789I	ENST00000546292
P001	AWAT2	hg19	chrX	69262261	69262261	+	Intron	SNP	G	G	A	c.C429T	p.F143F	ENST00000440401
P001	CPXCR1	hg19	chrX	88008441	88008441	+	Missense_Mutation	SNP	G	G	A	c.G26A	p.S9N	ENST00000373111
P001	FRMPD3	hg19	chrX	106846436	106846436	+	Nonsense_Mutation	SNP	C	C	T	c.C5266T	p.Q1756X	ENST00000276185
P001	FRMPD3	hg19	chrX	106846471	106846471	+	Silent	SNP	A	A	G	c.A5301G	p.Q1767Q	ENST00000276185
P001	FRMPD3	hg19	chrX	106846439	106846439	+	Missense_Mutation	SNP	C	C	G	c.C5269G	p.Q1757E	ENST00000276185
P001	RBMX	hg19	chrX	135960230	135960230	+	Missense_Mutation	SNP	C	C	T	c.G232A	p.A78T	ENST00000562646
P001	FBXO25	hg19	chr8	401280	401280	+	Missense_Mutation	SNP	C	C	T	c.C487T	p.H163Y	ENST00000350302
P001	ANKRD30A	hg19	chr10	37490183	37490183	+	Silent	SNP	A	A	G	c.A2988G	p.S996S	ENST00000374660
P001	TNKS1BP1	hg19	chr11	57077790	57077790	+	Missense_Mutation	SNP	C	C	T	c.G2395A	p.E799K	ENST00000358252
P001	TNKS1BP1	hg19	chr11	57077791	57077791	+	Silent	SNP	C	C	T	c.G2394A	p.Q798Q	ENST00000358252
P001	TNKS1BP1	hg19	chr11	57081197	57081197	+	Missense_Mutation	SNP	G	G	C	c.C965G	p.T322S	ENST00000358252
P001	C11orf49	hg19	chr11	47183042	47183042	+	Silent	SNP	C	C	T	c.C558T	p.N186N	ENST00000536126
P001	FRG1B	hg19	chr20	29625950	29625950	+	RNA	SNP	G	G	A	c.G209A	p.G70E	ENST00000439954
P001	FRG1B	hg19	chr20	29628282	29628282	+	RNA	SNP	G	G	A	c.G299A	p.G100E	ENST00000439954
P001	FRG1B	hg19	chr20	29628270	29628270	+	RNA	SNP	G	G	A	c.G287A	p.C96Y	ENST00000439954
P001	FRG1B	hg19	chr20	29628273	29628273	+	RNA	SNP	A	A	G	c.A290G	p.N97S	ENST00000439954
P001	FRG1B	hg19	chr20	29628245	29628245	+	RNA	SNP	G	G	A	c.G262A	p.A88T	ENST00000439954
P001	FRG1B	hg19	chr20	29625965	29625965	+	RNA	SNP	G	G	A	c.G224A	p.W75X	ENST00000439954
P001	FRG1B	hg19	chr20	29628283	29628283	+	RNA	SNP	G	G	C	c.G300C	p.G100G	ENST00000439954
P001	PIH1D2	hg19	chr11	111941405	111941405	+	Nonsense_Mutation	SNP	G	G	A	c.C568T	p.R190X	ENST00000532211
P001	EPHB6	hg19	chr13	39261568	39261570	+	In_Frame_Del	DEL	GCT	GCT	-	c.87_89del	p.29_30del	ENST00000442129
P001	SEC24D	hg19	chr4	119718906	119718906	+	Missense_Mutation	SNP	T	T	C	c.A976G	p.M326V	ENST00000379735
P001	CACNA1C	hg19	chr12	2602499	2602499	+	Missense_Mutation	SNP	C	C	A	c.C1060A	p.L354I	ENST00000480911
P001	TMBIM4	hg19	chr12	2602498	2602498	+	In_Frame_Ins	INS	-	-	TTGTTCCAGTGC	c.1059_1060insTTGTTCCAGTGC	p.M353delinsMLFQC	ENST00000286424
P001	TAS1R1	hg19	chr11	77784147	77784147	+	Frame_Shift_Del	DEL	A	A	-	c.207delT	p.F69fs	ENST00000333172
P001	ADAM8	hg19	chr10	135086353	135086353	+	Silent	SNP	G	G	A	c.C654T	p.S218S	ENST00000445355
P001	RNF219	hg19	chr13	79212972	79212972	+	Missense_Mutation	SNP	C	C	T	c.G535A	p.D179N	ENST00000282003
P001	DSPP	hg19	chr4	88537360	88537360	+	Silent	SNP	T	T	C	c.T3546C	p.D1182D	ENST00000399271
P001	DSPP	hg19	chr4	88537411	88537411	+	Silent	SNP	C	C	T	c.C3597T	p.S1199S	ENST00000399271
P001	DSPP	hg19	chr4	88537396	88537396	+	Silent	SNP	C	C	T	c.C3582T	p.D1194D	ENST00000399271
P001	DSPP	hg19	chr4	88537432	88537432	+	Silent	SNP	T	T	C	c.T3618C	p.D1206D	ENST00000399271
P001	DSPP	hg19	chr4	88537393	88537393	+	Silent	SNP	C	C	T	c.C3579T	p.S1193S	ENST00000399271
P001	DSPP	hg19	chr4	88536874	88536874	+	Silent	SNP	C	C	T	c.C3060T	p.D1020D	ENST00000399271
P001	DSPP	hg19	chr4	88537423	88537423	+	Silent	SNP	T	T	C	c.T3609C	p.D1203D	ENST00000399271
P001	DSPP	hg19	chr4	88537426	88537426	+	Silent	SNP	T	T	C	c.T3612C	p.S1204S	ENST00000399271
P001	GPD1L	hg19	chr3	32200415	32200415	+	Silent	SNP	A	A	C	c.A666C	p.G222G	ENST00000282541
P001	ANO10	hg19	chr4	81123250	81123252	+	In_Frame_Del	DEL	CAG	CAG	-	c.634_636del	p.212_212del	ENST00000456438
P001	PTPRD	hg19	chr9	8500944	8500944	+	Silent	SNP	G	G	A	c.C1938T	p.S646S	ENST00000381196
P001	DNAAF1	hg19	chr16	84203896	84203896	+	Missense_Mutation	SNP	C	C	G	c.C1462G	p.R488G	ENST00000378553
P001	PANX3	hg19	chr11	124487317	124487317	+	Missense_Mutation	SNP	G	G	T	c.G472T	p.V158L	ENST00000284288
P001	CDH12	hg19	chr5	21802412	21802412	+	Missense_Mutation	SNP	T	T	A	c.A1120T	p.S374C	ENST00000382254
P001	ABI3BP	hg19	chr3	100558972	100558972	+	Intron	SNP	C	C	G	c.G1862C	p.R621P	ENST00000495063
P001	2020-09-02	hg19	chr2	242738494	242738496	+	In_Frame_Del	DEL	TCC	TCC	-	c.44_46del	p.15_16del	ENST00000401990
P001	MIA3	hg19	chr1	222833287	222833287	+	Silent	SNP	A	A	G	c.A4914G	p.E1638E	ENST00000344922
P001	PGM5	hg19	chr9	71094363	71094363	+	Silent	SNP	C	C	T	c.C1189T	p.L397L	ENST00000396396
P001	C10orf90	hg19	chr10	128193207	128193207	+	Missense_Mutation	SNP	G	G	A	c.C853T	p.R285W	ENST00000544758
P001	TTN	hg19	chr2	179590135	179590135	+	Silent	SNP	A	A	G	c.T20796C	p.D6932D	ENST00000589042
P001	TTN	hg19	chr2	179471822	179471822	+	Missense_Mutation	SNP	C	C	T	c.G53507A	p.R17836H	ENST00000589042
P001	FMN2	hg19	chr1	240370932	240370932	+	Silent	SNP	G	G	A	c.G2820A	p.A940A	ENST00000319653
P001	FMN2	hg19	chr1	240370940	240370940	+	Missense_Mutation	SNP	C	C	T	c.C2828T	p.P943L	ENST00000319653
P001	FMN2	hg19	chr1	240370967	240370967	+	Missense_Mutation	SNP	C	C	G	c.C2855G	p.A952G	ENST00000319653
P001	STX16-NPEPL1	hg19	chr12	66531936	66531936	+	Frame_Shift_Ins	INS	-	-	A	c.661dupT	p.Y221fs	ENST00000530122
P001	UNC5D	hg19	chr8	35624567	35624567	+	Nonsense_Mutation	SNP	C	C	T	c.C2476T	p.Q826X	ENST00000416672
P001	PAFAH2	hg19	chr1	26314776	26314776	+	Missense_Mutation	SNP	G	G	A	c.C287T	p.T96I	ENST00000441420
P001	UBXN11	hg19	chr1	26608852	26608852	+	Missense_Mutation	SNP	G	G	A	c.C1501T	p.P501S	ENST00000374222
P001	POM121L2	hg19	chr6	27278466	27278466	+	Missense_Mutation	SNP	G	G	A	c.C1292T	p.P431L	ENST00000377451
P001	PINK1	hg19	chr1	20972204	20972204	+	Missense_Mutation	SNP	G	G	A	c.G1111A	p.E371K	ENST00000321556
P001	RCAN1	hg19	chr21	35986089	35986089	+	Silent	SNP	C	C	T	c.G6A	p.V2V	ENST00000399272
P001	AC093157.1	hg19	chr16	55362674	55362676	+	In_Frame_Del	DEL	GAG	GAG	-	c.784_786del	p.262_262del	ENST00000593496
P001	TCHH	hg19	chr1	152083890	152083890	+	Silent	SNP	T	T	C	c.A1803G	p.R601R	ENST00000368804
P001	RLTPR	hg19	chr16	67686164	67686164	+	Silent	SNP	A	A	G	c.A2631G	p.G877G	ENST00000545661
P001	ANKLE1	hg19	chr19	17397495	17397495	+	Missense_Mutation	SNP	G	G	T	c.G1765T	p.V589L	ENST00000598347
P001	TMPRSS3	hg19	chr21	43805637	43805637	+	Silent	SNP	C	C	T	c.G453A	p.V151V	ENST00000433957
P001	UBASH3A	hg19	chr21	43836580	43836580	+	Silent	SNP	C	C	T	c.C697T	p.L233L	ENST00000319294
P001	ADAMTS13	hg19	chr9	136301969	136301969	+	Silent	SNP	G	G	T	c.G1329T	p.L443L	ENST00000371929
P001	HNRNPA0	hg19	chr3	43647213	43647213	+	Frame_Shift_Del	DEL	T	T	-	c.132delA	p.K44fs	ENST00000314940
P001	LRRC56	hg19	chr11	553982	553982	+	Silent	SNP	C	C	T	c.C1335T	p.S445S	ENST00000270115
P001	FAM171A2	hg19	chr17	42437292	42437292	+	Missense_Mutation	SNP	C	C	G	c.G327C	p.W109C	ENST00000589407
P001	TAF6L	hg19	chr11	62554130	62554130	+	Missense_Mutation	SNP	G	G	A	c.G1231A	p.A411T	ENST00000294168
P001	ACOT11	hg19	chr1	55014014	55014014	+	Missense_Mutation	SNP	G	G	T	c.G32T	p.R11L	ENST00000371316
P001	TDRD5	hg19	chr1	179603674	179603674	+	Missense_Mutation	SNP	G	G	C	c.G1209C	p.E403D	ENST00000444136
P001	ANKRD30BL	hg19	chr2	132905792	132905792	+	RNA	SNP	G	G	C	c.C689G	p.S230C	ENST00000409867
P001	ANKRD30BL	hg19	chr2	132905741	132905741	+	RNA	SNP	G	G	A	c.C740T	p.T247M	ENST00000409867
P001	ANKRD30BL	hg19	chr2	132905706	132905706	+	RNA	SNP	A	A	G	c.T775C	p.X259Q	ENST00000409867
P001	ERCC3	hg19	chr2	128051448	128051448	+	5'UTR	SNP	C	C	A	c.G210T	p.S70S	ENST00000445889
P001	SPRR3	hg19	chr1	152975739	152975739	+	Silent	SNP	T	T	C	c.T243C	p.G81G	ENST00000443178
P001	DSPP	hg19	chr2	238263551	238263551	+	Frame_Shift_Del	DEL	G	G	-	c.6618delC	p.P2206fs	ENST00000399271
P001	NBPF10	hg19	chr1	145368456	145368456	+	Silent	SNP	G	G	C	c.G10434C	p.L3478L	ENST00000342960
P001	NBPF10	hg19	chr1	145296448	145296448	+	Missense_Mutation	SNP	T	T	A	c.T370A	p.Y124N	ENST00000490598
P001	LMOD1	hg19	chr1	201915414	201915414	+	Missense_Mutation	SNP	T	T	C	c.A55G	p.S19G	ENST00000367288
P001	FAM194A	hg19	chr3	150421527	150421527	+	Silent	SNP	C	C	T	c.G159A	p.E53E	ENST00000474463
P001	FAM194A	hg19	chr3	150421606	150421606	+	Missense_Mutation	SNP	T	T	A	c.A80T	p.E27V	ENST00000498386
P001	FAM194A	hg19	chr3	150421612	150421612	+	Nonsense_Mutation	SNP	A	A	T	c.T74A	p.L25X	ENST00000498386
P001	PLB1	hg19	chr2	28854958	28854958	+	Missense_Mutation	SNP	C	C	T	c.C3953T	p.A1318V	ENST00000327757
P001	TKT	hg19	chr3	53262148	53262148	+	Silent	SNP	C	C	T	c.G1521A	p.K507K	ENST00000423516
P001	TKT	hg19	chr3	53262130	53262130	+	Silent	SNP	A	A	C	c.T1539G	p.V513V	ENST00000423516
P001	TKT	hg19	chr3	53262106	53262106	+	Silent	SNP	G	G	A	c.C1563T	p.H521H	ENST00000423516
P001	NPY1R	hg19	chr4	164247422	164247422	+	Silent	SNP	G	G	A	c.C285T	p.P95P	ENST00000296533
P001	PAPD4	hg19	chr5	78940975	78940975	+	Nonsense_Mutation	SNP	C	C	T	c.C781T	p.R261X	ENST00000428308
P001	MIOS	hg19	chr7	7613353	7613353	+	Missense_Mutation	SNP	C	C	T	c.C1247T	p.A416V	ENST00000340080
P001	FREM1	hg19	chr9	14859295	14859295	+	Missense_Mutation	SNP	C	C	A	c.G517T	p.V173F	ENST00000422223
P001	HNRNPK	hg19	chr9	86587020	86587020	+	Missense_Mutation	SNP	C	C	G	c.G730C	p.D244H	ENST00000376281
P001	MAGEC3	hg19	chrX	140969189	140969189	+	Missense_Mutation	SNP	C	C	A	c.C516A	p.S172R	ENST00000298296
P001	ZNF503	hg19	chr10	77159218	77159218	+	Silent	SNP	G	G	A	c.C1230T	p.S410S	ENST00000535216
P001	RET	hg19	chr10	43610039	43610039	+	Missense_Mutation	SNP	C	C	T	c.C1991T	p.A664V	ENST00000355710
P001	GYLTL1B	hg19	chr11	45946423	45946423	+	Missense_Mutation	SNP	G	G	A	c.G659A	p.G220D	ENST00000529052
P001	RAPSN	hg19	chr11	47469483	47469483	+	Missense_Mutation	SNP	C	C	G	c.G412C	p.V138L	ENST00000529341
P001	NDUFB8	hg19	chr10	102289530	102289530	+	Missense_Mutation	SNP	G	G	A	c.C79T	p.R27W	ENST00000557395
P001	CKB	hg19	chr14	103986279	103986279	+	Silent	SNP	T	T	C	c.A1068G	p.G356G	ENST00000348956
P001	MSS51	hg19	chr10	75187406	75187406	+	Silent	SNP	C	C	T	c.G342A	p.G114G	ENST00000487126
P001	PPFIBP2	hg19	chr11	7654134	7654134	+	Missense_Mutation	SNP	C	C	T	c.C1105T	p.P369S	ENST00000299492
P001	BEAN1	hg19	chr16	66511498	66511498	+	Missense_Mutation	SNP	A	A	G	c.A325G	p.R109G	ENST00000536005
P001	TMEM135	hg19	chr11	87029237	87029237	+	Missense_Mutation	SNP	C	C	T	c.C1136T	p.T379I	ENST00000305494
P001	PLEKHA7	hg19	chr11	16823317	16823317	+	Silent	SNP	C	C	T	c.G2205A	p.Q735Q	ENST00000531066
P001	DUS2	hg19	chr16	68104041	68104041	+	Missense_Mutation	SNP	C	C	T	c.C559T	p.R187W	ENST00000565263
P001	CDT1	hg19	chr16	88873557	88873557	+	Silent	SNP	G	G	A	c.G1221A	p.P407P	ENST00000301019
P001	KMT2D	hg19	chr12	49445428	49445428	+	Missense_Mutation	SNP	T	T	G	c.A2038C	p.T680P	ENST00000301067
P001	NLRP7	hg19	chr19	55450903	55450903	+	Silent	SNP	G	G	A	c.C1284T	p.S428S	ENST00000588756
P001	KLK6	hg19	chr19	51466584	51466584	+	Missense_Mutation	SNP	A	A	G	c.T419C	p.I140T	ENST00000310157
P001	BSCL2	hg19	chr11	62472874	62472874	+	Silent	SNP	G	G	A	c.C303T	p.T101T	ENST00000532818
P001	FOXO3	hg19	chr3	41860984	41860984	+	Frame_Shift_Ins	INS	-	-	T	c.1778dupA	p.K593fs	ENST00000343882
P001	KIF5C	hg19	chr2	149847607	149847607	+	Silent	SNP	C	C	T	c.C1800T	p.S600S	ENST00000435030
P001	PDHB	hg19	chr3	58413886	58413886	+	Missense_Mutation	SNP	C	C	A	c.G901T	p.D301Y	ENST00000485460
P001	CCDC80	hg19	chr2	242265495	242265495	+	Frame_Shift_Del	DEL	A	A	-	c.97delA	p.K33fs	ENST00000479368
P001	KLHL30	hg19	chr2	239049437	239049437	+	Silent	SNP	G	G	A	c.G42A	p.S14S	ENST00000409223
P001	CHRM1	hg19	chr11	62677968	62677968	+	Missense_Mutation	SNP	G	G	A	c.C605T	p.T202I	ENST00000543973
P001	SLC25A5	hg19	chr17	63533733	63533735	+	In_Frame_Del	DEL	TGG	TGG	-	c.1419_1421del	p.473_474del	ENST00000317881
P001	FAM178B	hg19	chr2	97617140	97617140	+	Silent	SNP	T	T	C	c.A1413G	p.V471V	ENST00000417561
P001	ROR2	hg19	chr9	94495695	94495695	+	Missense_Mutation	SNP	A	A	G	c.T226C	p.S76P	ENST00000375715
P001	BCL9	hg19	chr8	37791833	37791833	+	Frame_Shift_Ins	INS	-	-	T	c.1243dupA	p.T415fs	ENST00000234739
P001	OR4K15	hg19	chr14	20443700	20443700	+	Missense_Mutation	SNP	T	T	C	c.T23C	p.L8P	ENST00000305051
P001	MUC3A	hg19	chr7	100551271	100551271	+	Missense_Mutation	SNP	T	T	C	c.T22C	p.S8P	ENST00000319509
P001	MUC3A	hg19	chr7	100551276	100551276	+	Silent	SNP	A	A	C	c.A27C	p.T9T	ENST00000319509
P001	KCNAB3	hg19	chr17	7832524	7832524	+	Missense_Mutation	SNP	C	C	T	c.G230A	p.G77D	ENST00000570852
P001	FOXD4	hg19	chr9	117998	117998	+	Missense_Mutation	SNP	G	G	T	c.C122A	p.A41E	ENST00000382500
P001	ZNF282	hg19	chr7	148921525	148921525	+	Missense_Mutation	SNP	C	C	G	c.C1802G	p.P601R	ENST00000262085
P001	GLB1	hg19	chr3	33087674	33087674	+	Missense_Mutation	SNP	G	G	T	c.C1150A	p.P384T	ENST00000445488
P001	ADORA2B	hg19	chr17	15848618	15848618	+	Missense_Mutation	SNP	C	C	T	c.C56T	p.A19V	ENST00000304222
P001	KRT74	hg19	chr12	52967513	52967513	+	Missense_Mutation	SNP	T	T	A	c.A49T	p.S17C	ENST00000549343
P001	DLGAP1	hg19	chr18	3729236	3729236	+	Missense_Mutation	SNP	G	G	T	c.C1490A	p.A497D	ENST00000581527
P001	RBMXL2	hg19	chr11	7110547	7110547	+	Missense_Mutation	SNP	G	G	A	c.G196A	p.A66T	ENST00000306904
P001	AKAP13	hg19	chr15	86124464	86124464	+	Missense_Mutation	SNP	T	T	G	c.T3165G	p.D1055E	ENST00000559362
P001	FOXN2	hg19	chr2	48602471	48602471	+	Silent	SNP	G	G	A	c.G1185A	p.E395E	ENST00000340553
P001	CEL	hg19	chr9	135946624	135946624	+	Missense_Mutation	SNP	A	A	G	c.A1744G	p.T582A	ENST00000372080
P001	KRT15	hg19	chr17	39674999	39674999	+	Silent	SNP	T	T	C	c.A81G	p.G27G	ENST00000393976
P001	TPPP	hg19	chr5	678087	678087	+	Missense_Mutation	SNP	C	C	T	c.G89A	p.R30K	ENST00000360578
P001	WDR87	hg19	chr19	38384595	38384595	+	Missense_Mutation	SNP	T	T	G	c.A1748C	p.K583T	ENST00000447313
P001	THOP1	hg19	chr19	2811727	2811727	+	Missense_Mutation	SNP	A	A	G	c.A1903G	p.S635G	ENST00000307741
P001	LAMB2	hg19	chr3	49160682	49160682	+	Silent	SNP	C	C	T	c.G4107A	p.E1369E	ENST00000418109
P001	EFCAB12	hg19	chr3	129147319	129147319	+	Missense_Mutation	SNP	A	A	T	c.T13A	p.Y5N	ENST00000505956
P001	OVOL1	hg19	chr11	65561623	65561623	+	Silent	SNP	C	C	T	c.C222T	p.P74P	ENST00000335987
P001	DMXL1	hg19	chr5	118465048	118465048	+	Missense_Mutation	SNP	A	A	C	c.A1245C	p.K415N	ENST00000503802
P001	HECTD4	hg19	chr12	112654159	112654159	+	Missense_Mutation	SNP	G	G	A	c.C6964T	p.H2322Y	ENST00000550722
P001	HECTD4	hg19	chr12	112720932	112720932	+	Missense_Mutation	SNP	G	G	T	c.C1078A	p.L360M	ENST00000550722
P001	RP11-683L23.1	hg19	chr18	48011	48011	+	IGR	SNP	T	T	C	c.A714G	p.T238T	ENST00000308911
P001	PEAK1	hg19	chr15	77472524	77472524	+	Missense_Mutation	SNP	G	G	A	c.C1745T	p.T582I	ENST00000558305
P001	MED12	hg19	chr1	6638843	6638845	+	In_Frame_Del	DEL	GCT	GCT	-	c.1725_1727del	p.575_576del	ENST00000374102
P001	IKZF2	hg19	chr17	7366346	7366348	+	In_Frame_Del	DEL	TCA	TCA	-	c.1953_1955del	p.651_652del	ENST00000442445
P001	SLC6A19	hg19	chr5	1208906	1208906	+	Missense_Mutation	SNP	T	T	C	c.T248C	p.I83T	ENST00000515652
P001	GOLGA6L2	hg19	chr15	23686043	23686043	+	Missense_Mutation	SNP	A	A	G	c.T1579C	p.W527R	ENST00000567107
P001	PCDHB4	hg19	chr15	23686010	23686010	+	In_Frame_Ins	INS	-	-	CTC	c.1611_1612insGAG	p.K538delinsEK	ENST00000194152
P001	GOLGA6L2	hg19	chr15	23686022	23686022	+	Missense_Mutation	SNP	A	A	G	c.T1600C	p.W534R	ENST00000567107
P001	CTBP2	hg19	chr10	126678241	126678241	+	Missense_Mutation	SNP	G	G	C	c.C1184G	p.A395G	ENST00000531469
P001	CTBP2	hg19	chr10	126678207	126678207	+	Silent	SNP	G	G	T	c.C1218A	p.I406I	ENST00000531469
P001	CTBP2	hg19	chr10	126678171	126678171	+	Silent	SNP	C	C	G	c.G1254C	p.P418P	ENST00000531469
P001	CCNE2	hg19	chr8	95902742	95902742	+	Nonsense_Mutation	SNP	T	T	A	c.A202T	p.K68X	ENST00000521809
P001	PRDM8	hg19	chr13	103386924	103386924	+	Nonsense_Mutation	DEL	T	T	-	c.2236delA	p.I746X	ENST00000515013
P001	OR11H4	hg19	chr14	20711097	20711097	+	Missense_Mutation	SNP	G	G	T	c.G147T	p.L49F	ENST00000315409
P001	ZNF575	hg19	chr19	44039531	44039531	+	Missense_Mutation	SNP	A	A	C	c.A727C	p.T243P	ENST00000458714
P001	KIAA2018	hg19	chr3	113376113	113376113	+	Silent	SNP	C	C	T	c.G4416A	p.Q1472Q	ENST00000316407
P001	DSCAML1	hg19	chr11	117351256	117351256	+	Missense_Mutation	SNP	C	C	A	c.G2867T	p.R956L	ENST00000321322
P001	OR2T33	hg19	chr1	248436527	248436527	+	Missense_Mutation	SNP	A	A	C	c.T590G	p.M197R	ENST00000318021
P001	OR2T33	hg19	chr1	248436582	248436582	+	Missense_Mutation	SNP	T	T	C	c.A535G	p.T179A	ENST00000318021
P001	GJD4	hg19	chr10	35896770	35896770	+	Missense_Mutation	SNP	G	G	A	c.G329A	p.R110H	ENST00000321660
P001	TOP3A	hg19	chr17	18205916	18205916	+	Silent	SNP	C	C	T	c.G546A	p.R182R	ENST00000580095
P001	TOP3A	hg19	chr17	18205915	18205915	+	Nonsense_Mutation	SNP	G	G	A	c.C547T	p.Q183X	ENST00000580095
P001	XPNPEP2	hg19	chr3	48965064	48965066	+	In_Frame_Del	DEL	GAA	GAA	-	c.73_75del	p.25_25del	ENST00000371106
P001	POU6F2	hg19	chr5	137088929	137088931	+	In_Frame_Del	DEL	CCG	CCG	-	c.825_827del	p.275_276del	ENST00000403058
P001	CAPZA3	hg19	chr12	18891506	18891506	+	Nonsense_Mutation	SNP	A	A	T	c.A304T	p.K102X	ENST00000317658
P001	PDE4DIP	hg19	chr1	144856817	144856817	+	Missense_Mutation	SNP	T	T	C	c.A7076G	p.E2359G	ENST00000369359
P001	GOLGA8Q	hg19	chr15	30853933	30853933	+	IGR	SNP	A	A	G	c.A1390G	p.K464E	ENST00000562783
P001	OR6B3	hg19	chr2	240985218	240985218	+	Missense_Mutation	SNP	C	C	T	c.G272A	p.R91H	ENST00000319423
P001	GRINA	hg19	chr8	145065539	145065539	+	Missense_Mutation	SNP	T	T	C	c.T148C	p.S50P	ENST00000530898
P001	ZHX2	hg19	chr8	123966151	123966151	+	Missense_Mutation	SNP	G	G	C	c.G2401C	p.E801Q	ENST00000314393
P001	TPRX1	hg19	chr19	48305634	48305634	+	Missense_Mutation	SNP	A	A	G	c.T925C	p.S309P	ENST00000535759
P001	HNRNPCL1	hg19	chr1	12907620	12907620	+	Silent	SNP	A	A	G	c.T523C	p.L175L	ENST00000317869
P001	MAGED1	hg19	chrX	51637801	51637801	+	Missense_Mutation	SNP	A	A	C	c.A124C	p.T42P	ENST00000375695
P001	NRXN1	hg19	chr2	50724528	50724528	+	Nonsense_Mutation	SNP	A	A	T	c.T2822A	p.L941X	ENST00000406859
P001	CYP8B1	hg19	chr3	42916913	42916913	+	Silent	SNP	C	C	T	c.G396A	p.R132R	ENST00000437102
P001	KLHL34	hg19	chr10	21805698	21805700	+	In_Frame_Del	DEL	GGT	GGT	-	c.1052_1054del	p.351_352del	ENST00000379499
P001	AGTR2	hg19	chrX	115303581	115303581	+	Silent	SNP	C	C	T	c.C48T	p.S16S	ENST00000371906
P001	ANKRD30B	hg19	chr18	14852101	14852101	+	Silent	SNP	C	C	T	c.C3801T	p.D1267D	ENST00000358984
P001	MUC16	hg19	chr19	9024998	9024998	+	Silent	SNP	C	C	T	c.G36864A	p.R12288R	ENST00000397910
P001	MUC16	hg19	chr19	9016991	9016991	+	Silent	SNP	G	G	T	c.C38004A	p.P12668P	ENST00000397910
P001	MUC16	hg19	chr19	9024951	9024951	+	Missense_Mutation	SNP	T	T	A	c.A36911T	p.H12304L	ENST00000397910
P001	MUC16	hg19	chr19	9006714	9006714	+	Silent	SNP	T	T	C	c.A39534G	p.L13178L	ENST00000397910
P001	MUC16	hg19	chr19	9006720	9006720	+	Silent	SNP	A	A	G	c.T39528C	p.T13176T	ENST00000397910
P001	MUC16	hg19	chr19	9006702	9006702	+	Silent	SNP	C	C	T	c.G39546A	p.E13182E	ENST00000397910
P001	MUC16	hg19	chr19	9006693	9006693	+	Silent	SNP	A	A	T	c.T39555A	p.G13185G	ENST00000397910
P001	MUC16	hg19	chr19	9016986	9016986	+	Missense_Mutation	SNP	C	C	G	c.G38009C	p.S12670T	ENST00000397910
P001	MUC16	hg19	chr19	9016982	9016982	+	Silent	SNP	G	G	A	c.C38013T	p.S12671S	ENST00000397910
P001	MUC16	hg19	chr19	9006694	9006694	+	Missense_Mutation	SNP	C	C	T	c.G39554A	p.G13185D	ENST00000397910
P001	MUC16	hg19	chr19	9024995	9024995	+	Silent	SNP	G	G	A	c.C36867T	p.P12289P	ENST00000397910
P001	MUC16	hg19	chr19	9024965	9024965	+	Silent	SNP	A	A	G	c.T36897C	p.D12299D	ENST00000397910
P001	MUC16	hg19	chr19	9024988	9024988	+	Missense_Mutation	SNP	C	C	G	c.G36874C	p.D12292H	ENST00000397910
P001	MUC16	hg19	chr19	9008292	9008292	+	Missense_Mutation	SNP	A	A	G	c.T39260C	p.L13087P	ENST00000397910
P001	MUC16	hg19	chr19	9021063	9021063	+	Silent	SNP	C	C	T	c.G37260A	p.L12420L	ENST00000397910
P001	COPG1	hg19	chr3	128979608	128979608	+	Missense_Mutation	SNP	G	G	T	c.G1086T	p.K362N	ENST00000314797
P001	OR52A1	hg19	chr11	5173251	5173251	+	Missense_Mutation	SNP	G	G	A	c.C349T	p.L117F	ENST00000380367
P001	HNRNPUL2-BSCL2	hg19	chr7	5352791	5352793	+	In_Frame_Del	DEL	GCT	GCT	-	c.7729_7731del	p.2577_2577del	ENST00000403734
P001	SGK223	hg19	chr8	8234188	8234188	+	Silent	SNP	G	G	A	c.C1731T	p.G577G	ENST00000520004
P001	VCX	hg19	chrX	7811293	7811293	+	Missense_Mutation	SNP	G	G	A	c.G49A	p.A17T	ENST00000381059
P001	OR10G7	hg19	chr11	123909691	123909691	+	Silent	SNP	T	T	G	c.A18C	p.L6L	ENST00000330487
P001	LSMD1	hg19	chr17	7760727	7760727	+	Missense_Mutation	SNP	G	G	A	c.C55T	p.R19W	ENST00000335155
P001	EP400	hg19	chr12	132547096	132547096	+	Silent	SNP	G	G	A	c.G8292A	p.Q2764Q	ENST00000333577
P001	RP1L1	hg19	chr8	10467047	10467047	+	Missense_Mutation	SNP	C	C	T	c.G4561A	p.V1521M	ENST00000382483
P001	PSG9	hg19	chr19	43773572	43773572	+	Silent	SNP	G	G	A	c.C12T	p.L4L	ENST00000596730
P001	TRAIP	hg19	chr3	49893812	49893812	+	Silent	SNP	G	G	A	c.C75T	p.C25C	ENST00000482582
P001	FOXJ2	hg19	chrX	70360589	70360591	+	In_Frame_Del	DEL	AGC	AGC	-	c.6146_6148del	p.2049_2050del	ENST00000428177
P001	KPTN	hg19	chrX	70360648	70360650	+	In_Frame_Del	DEL	CAG	CAG	-	c.6205_6207del	p.2069_2069del	ENST00000536339
P001	COL7A1	hg19	chr7	155532574	155532576	+	In_Frame_Del	DEL	CAC	CAC	-	c.1903_1905del	p.635_635del	ENST00000454817
P001	MUC6	hg19	chr11	1017543	1017543	+	Missense_Mutation	SNP	G	G	A	c.C5258T	p.T1753I	ENST00000421673
P001	FAM169B	hg19	chr15	98982904	98982904	+	Missense_Mutation	SNP	G	G	T	c.C535A	p.L179M	ENST00000558256
P001	MANEAL	hg19	chr1	38260242	38260242	+	Missense_Mutation	SNP	G	G	T	c.G88T	p.V30L	ENST00000532512
P001	TBC1D3F	hg19	chr17	36292977	36292977	+	Missense_Mutation	SNP	G	G	T	c.G1008T	p.E336D	ENST00000327454
P001	TICAM1	hg19	chr5	139493896	139493898	+	In_Frame_Del	DEL	GGC	GGC	-	c.130_132del	p.44_44del	ENST00000248244
P001	TNFAIP2	hg19	chr14	103601678	103601678	+	Missense_Mutation	SNP	C	C	T	c.C1946T	p.S649F	ENST00000560869
P001	MUC1	hg19	chr1	155161036	155161036	+	Missense_Mutation	SNP	T	T	G	c.A491C	p.N164T	ENST00000368395
P001	AHNAK2	hg19	chr14	105412138	105412138	+	Missense_Mutation	SNP	A	A	G	c.T9650C	p.L3217P	ENST00000333244
P001	AHNAK2	hg19	chr14	105412163	105412163	+	Missense_Mutation	SNP	C	C	G	c.G9625C	p.V3209L	ENST00000333244
P001	AHNAK2	hg19	chr14	105412066	105412066	+	Missense_Mutation	SNP	C	C	T	c.G9722A	p.R3241H	ENST00000333244
P001	AHNAK2	hg19	chr14	105412009	105412009	+	Missense_Mutation	SNP	A	A	G	c.T9779C	p.M3260T	ENST00000333244
P001	NPAP1	hg19	chr15	24921920	24921920	+	Missense_Mutation	SNP	G	G	T	c.G906T	p.M302I	ENST00000329468
P001	PURA	hg19	chrX	21674920	21674922	+	In_Frame_Del	DEL	CTC	CTC	-	c.985_987del	p.329_329del	ENST00000331327
P001	FAM186A	hg19	chr12	50746243	50746243	+	Missense_Mutation	SNP	T	T	G	c.A4372C	p.T1458P	ENST00000543111
P001	FAM186A	hg19	chr12	50746672	50746672	+	Missense_Mutation	SNP	A	A	G	c.T3943C	p.F1315L	ENST00000543111
P001	FAM186A	hg19	chr12	50745703	50745703	+	Missense_Mutation	SNP	T	T	G	c.A4912C	p.T1638P	ENST00000543111
P001	FAM186A	hg19	chr12	50745822	50745822	+	Missense_Mutation	SNP	T	T	G	c.A4793C	p.E1598A	ENST00000543111
P001	FAM186A	hg19	chr12	50746164	50746164	+	Missense_Mutation	SNP	A	A	G	c.T4451C	p.I1484T	ENST00000543111
P001	FAM186A	hg19	chr12	50746424	50746424	+	Missense_Mutation	SNP	C	C	G	c.G4191C	p.M1397I	ENST00000543111
P001	FAM186A	hg19	chr12	50746740	50746740	+	Missense_Mutation	SNP	T	T	G	c.A3875C	p.N1292T	ENST00000543111
P001	FAM186A	hg19	chr12	50745972	50745972	+	Missense_Mutation	SNP	A	A	G	c.T4643C	p.V1548A	ENST00000543111
P001	FAM186A	hg19	chr12	50745924	50745924	+	Missense_Mutation	SNP	T	T	C	c.A4691G	p.E1564G	ENST00000543111
P001	CYP4F2	hg19	chr19	15989613	15989613	+	Missense_Mutation	SNP	C	C	T	c.G1531A	p.G511R	ENST00000221700
P001	KRT26	hg19	chr17	38925131	38925131	+	Missense_Mutation	SNP	C	C	T	c.G1187A	p.R396K	ENST00000335552
P001	PCLO	hg19	chr7	82785414	82785414	+	Missense_Mutation	SNP	G	G	C	c.C543G	p.D181E	ENST00000423517
P001	PCLO	hg19	chr7	82784441	82784441	+	Missense_Mutation	SNP	A	A	G	c.T1516C	p.S506P	ENST00000423517
P001	PCLO	hg19	chr7	82784484	82784484	+	Silent	SNP	A	A	G	c.T1473C	p.P491P	ENST00000423517
P001	CLCNKA	hg19	chr1	16354394	16354394	+	Missense_Mutation	SNP	C	C	T	c.C860T	p.A287V	ENST00000375692
P001	ZNF732	hg19	chr4	265577	265577	+	Missense_Mutation	SNP	T	T	G	c.A1069C	p.T357P	ENST00000419098
P001	ZNF732	hg19	chr4	265563	265563	+	Silent	SNP	G	G	C	c.C1083G	p.P361P	ENST00000419098
P001	NPSR1	hg19	chr7	34867072	34867072	+	Missense_Mutation	SNP	C	C	T	c.C505T	p.P169S	ENST00000531252
P001	TMEM247	hg19	chr2	46707808	46707808	+	Missense_Mutation	SNP	C	C	G	c.C382G	p.Q128E	ENST00000434431
P001	TMEM247	hg19	chr2	46707812	46707812	+	Missense_Mutation	SNP	G	G	A	c.G386A	p.R129Q	ENST00000434431
P001	C17orf97	hg19	chr17	263486	263486	+	Silent	SNP	T	T	C	c.T852C	p.G284G	ENST00000360127
P001	C17orf97	hg19	chr17	263441	263441	+	Silent	SNP	T	T	C	c.T807C	p.P269P	ENST00000360127
P001	C17orf97	hg19	chr17	263643	263643	+	Missense_Mutation	SNP	C	C	A	c.C1009A	p.P337T	ENST00000360127
P001	GOT1L1	hg19	chr15	42302330	42302330	+	Intron	INS	-	-	CCC	c.115_116insGGG	p.A39delinsGA	ENST00000307599
P001	NHS	hg19	chrX	17705971	17705971	+	Silent	SNP	G	G	A	c.G144A	p.E48E	ENST00000398097
P001	SELL	hg19	chr1	169677885	169677885	+	Missense_Mutation	SNP	T	T	A	c.A184T	p.N62Y	ENST00000236147
P001	NDOR1	hg19	chr9	140110799	140110799	+	Silent	SNP	C	C	T	c.C1704T	p.S568S	ENST00000458322
P001	KRTAP1-1	hg19	chr17	39197557	39197557	+	Silent	SNP	C	C	T	c.G93A	p.E31E	ENST00000306271
P001	GOLGA8M	hg19	chr15	28951264	28951264	+	Missense_Mutation	SNP	A	A	G	c.T872C	p.M291T	ENST00000563027
P001	GOLGA8M	hg19	chr15	28951292	28951292	+	Missense_Mutation	SNP	T	T	A	c.A844T	p.R282W	ENST00000563027
P001	GOLGA8M	hg19	chr15	28951301	28951301	+	Missense_Mutation	SNP	T	T	G	c.A835C	p.K279Q	ENST00000563027
P001	SLC4A5	hg19	chr2	74474322	74474322	+	Missense_Mutation	SNP	G	G	A	c.C1900T	p.R634C	ENST00000423644
P001	RELN	hg19	chr7	103243900	103243900	+	Missense_Mutation	SNP	C	C	T	c.G3184A	p.E1062K	ENST00000428762
P001	OR5K4	hg19	chr3	98073611	98073611	+	Missense_Mutation	SNP	A	A	T	c.A914T	p.Y305F	ENST00000354924
P001	MTMR9	hg19	chr3	98073608	98073608	+	Frame_Shift_Ins	INS	-	-	T	c.912dupT	p.N304fs	ENST00000526292
P001	HLA-DRB1	hg19	chr6	32551935	32551935	+	Silent	SNP	G	G	A	c.C321T	p.Y107Y	ENST00000360004
P001	ZNF681	hg19	chr19	23927195	23927195	+	Missense_Mutation	SNP	A	A	C	c.T1157G	p.I386R	ENST00000402377
P001	RYR1	hg19	chr19	38956850	38956850	+	Missense_Mutation	SNP	G	G	A	c.G2990A	p.R997Q	ENST00000360985
P001	KRTAP5-3	hg19	chr11	1629121	1629121	+	Silent	SNP	A	A	G	c.T495C	p.C165C	ENST00000399685
P001	KRTAP5-3	hg19	chr11	1629149	1629149	+	Missense_Mutation	SNP	G	G	C	c.C467G	p.S156C	ENST00000399685
P001	KRTAP5-3	hg19	chr11	1629119	1629119	+	Missense_Mutation	SNP	G	G	C	c.C497G	p.S166C	ENST00000399685
P001	KRTAP5-3	hg19	chr11	1629088	1629088	+	Silent	SNP	G	G	A	c.C528T	p.C176C	ENST00000399685
P001	KRTAP5-3	hg19	chr11	1629163	1629163	+	Silent	SNP	G	G	A	c.C453T	p.C151C	ENST00000399685
P001	KRTAP5-3	hg19	chr11	1629156	1629156	+	Missense_Mutation	SNP	T	T	A	c.A460T	p.S154C	ENST00000399685
P001	OR2T2	hg19	chr1	248616749	248616749	+	Silent	SNP	C	C	G	c.C651G	p.V217V	ENST00000342927
P001	OR2T2	hg19	chr1	248616883	248616883	+	Missense_Mutation	SNP	T	T	A	c.T785A	p.L262Q	ENST00000342927
P001	HNRNPA1L2	hg19	chr16	28913639	28913639	+	Frame_Shift_Ins	INS	-	-	C	c.2457dupC	p.R819fs	ENST00000342657
P001	ZNF124	hg19	chr1	247320697	247320697	+	Missense_Mutation	SNP	A	A	T	c.T227A	p.I76K	ENST00000543802
P001	NACA	hg19	chr12	57111466	57111466	+	Intron	SNP	T	T	G	c.A3848C	p.H1283P	ENST00000454682
P001	NACA	hg19	chr12	57111746	57111746	+	Intron	SNP	A	A	G	c.T3568C	p.S1190P	ENST00000454682
P001	NACA	hg19	chr12	57112083	57112083	+	Intron	SNP	C	C	T	c.G3231A	p.K1077K	ENST00000454682
P001	NACA	hg19	chr12	57111618	57111618	+	Intron	SNP	C	C	T	c.G3696A	p.L1232L	ENST00000454682
P001	NACA	hg19	chr12	57112087	57112087	+	Intron	SNP	A	A	G	c.T3227C	p.L1076P	ENST00000454682
P001	NACA	hg19	chr12	57111608	57111608	+	Intron	SNP	A	A	G	c.T3706C	p.S1236P	ENST00000454682
P001	LAMA2	hg19	chr6	129785584	129785584	+	Missense_Mutation	SNP	C	C	T	c.C7142T	p.A2381V	ENST00000421865
P001	RIMBP3	hg19	chr22	20457514	20457514	+	Missense_Mutation	SNP	T	T	G	c.A3788C	p.E1263A	ENST00000426804
P001	OR8B3	hg19	chr11	124266758	124266758	+	Missense_Mutation	SNP	G	G	A	c.C490T	p.L164F	ENST00000354597
P001	ANKRD20A1	hg19	chr9	67934748	67934748	+	Missense_Mutation	SNP	C	C	T	c.C518T	p.A173V	ENST00000377477
P001	TNRC18	hg19	chr4	140810639	140810641	+	In_Frame_Del	DEL	GCT	GCT	-	c.1949_1951del	p.650_651del	ENST00000430969
P001	MAML3	hg19	chr4	140811117	140811117	+	Silent	SNP	C	C	T	c.G1473A	p.Q491Q	ENST00000509479
P001	RGPD4	hg19	chr2	108488581	108488581	+	Nonsense_Mutation	SNP	G	G	A	c.G4121A	p.W1374X	ENST00000408999
P001	ZNF470	hg19	chr19	57088966	57088966	+	Missense_Mutation	SNP	A	A	C	c.A1169C	p.Y390S	ENST00000330619
P001	MIB2	hg19	chr1	1558981	1558981	+	Missense_Mutation	SNP	G	G	A	c.G494A	p.R165H	ENST00000520777
P001	OR11L1	hg19	chr1	248004588	248004588	+	Missense_Mutation	SNP	A	A	G	c.T611C	p.I204T	ENST00000355784
P001	ENPP1	hg19	chr6	132207855	132207855	+	Missense_Mutation	SNP	G	G	T	c.G2598T	p.E866D	ENST00000360971
P001	WDR96	hg19	chr10	105944794	105944794	+	Silent	SNP	G	G	C	c.C2124G	p.T708T	ENST00000428666
P001	ATAD3A	hg19	chr1	1455652	1455652	+	Missense_Mutation	SNP	G	G	T	c.G409T	p.A137S	ENST00000536055
P001	HRNR	hg19	chr1	152188041	152188041	+	Missense_Mutation	SNP	C	C	T	c.G6064A	p.A2022T	ENST00000368801
P001	HRNR	hg19	chr1	152188999	152188999	+	Silent	SNP	G	G	A	c.C5106T	p.H1702H	ENST00000368801
P001	HRNR	hg19	chr1	152188940	152188940	+	Missense_Mutation	SNP	A	A	G	c.T5165C	p.L1722S	ENST00000368801
P001	HRNR	hg19	chr1	152189012	152189012	+	Missense_Mutation	SNP	T	T	C	c.A5093G	p.Q1698R	ENST00000368801
P001	HRNR	hg19	chr1	152189038	152189038	+	Silent	SNP	A	A	G	c.T5067C	p.Y1689Y	ENST00000368801
P001	NDUFC2-KCTD14	hg19	chr1	181680102	181680103	+	Frame_Shift_Del	DEL	AG	AG	-	c.1068_1069del	p.K356fs	ENST00000530054
P001	SLC29A3	hg19	chr10	73115888	73115888	+	Missense_Mutation	SNP	G	G	A	c.G661A	p.A221T	ENST00000373189
P001	ZNF583	hg19	chr19	56934985	56934985	+	Missense_Mutation	SNP	G	G	A	c.G958A	p.G320R	ENST00000333201
P001	HLA-DRB5	hg19	chr6	32497910	32497910	+	Missense_Mutation	SNP	T	T	C	c.A92G	p.D31G	ENST00000374975
P001	HLA-DRB5	hg19	chr6	32497913	32497913	+	Missense_Mutation	SNP	C	C	A	c.G89T	p.G30V	ENST00000374975
P001	UNC13B	hg19	chr9	35380620	35380620	+	Silent	SNP	C	C	T	c.C2148T	p.D716D	ENST00000396787
P001	F5	hg19	chr1	169510367	169510367	+	Missense_Mutation	SNP	T	T	G	c.A3961C	p.I1321L	ENST00000367797
P001	OXCT2	hg19	chr1	40236876	40236876	+	Missense_Mutation	SNP	C	C	T	c.G52A	p.G18S	ENST00000327582
P001	MUC2	hg19	chr11	1093022	1093022	+	Missense_Mutation	SNP	C	C	T	c.C4841T	p.T1614M	ENST00000441003
P001	GK	hg19	chrX	30738177	30738177	+	Missense_Mutation	SNP	G	G	C	c.G586C	p.A196P	ENST00000427190
P001	SLC4A3	hg19	chr1	153907279	153907281	+	In_Frame_Del	DEL	CTG	CTG	-	c.2761_2763del	p.921_921del	ENST00000373762
P001	ARHGEF15	hg19	chr17	8216393	8216393	+	Missense_Mutation	SNP	A	A	C	c.A755C	p.H252P	ENST00000361926
P001	GPRIN2	hg19	chr10	46999601	46999601	+	Missense_Mutation	SNP	G	G	A	c.G721A	p.V241M	ENST00000374317
P001	SKIV2L	hg19	chr6	31935806	31935806	+	Silent	SNP	G	G	A	c.G2805A	p.V935V	ENST00000375394
P001	PRAMEF7	hg19	chr1	12980232	12980232	+	Silent	SNP	G	G	A	c.G1424A	p.X475X	ENST00000361079
P001	PRAMEF11	hg19	chr1	12888476	12888476	+	Silent	SNP	C	C	T	c.G48A	p.V16V	ENST00000535591
P001	AC024580.1	hg19	chr19	56663058	56663058	+	Intron	SNP	C	C	G	c.G193C	p.A65P	ENST00000376271
P001	AC024580.1	hg19	chr19	56662945	56662945	+	Intron	SNP	C	C	T	c.G306A	p.T102T	ENST00000376271
P001	MUC21	hg19	chr6	30954534	30954534	+	Silent	SNP	T	T	A	c.T582A	p.T194T	ENST00000376296
P001	MUC21	hg19	chr6	30955066	30955066	+	Missense_Mutation	SNP	A	A	G	c.A1114G	p.T372A	ENST00000376296
P001	MUC21	hg19	chr6	30954919	30954919	+	Missense_Mutation	SNP	A	A	C	c.A967C	p.T323P	ENST00000376296
P001	KRTAP5-10	hg19	chr11	71276996	71276996	+	Silent	SNP	A	A	G	c.A363G	p.K121K	ENST00000398531
P001	LILRB3	hg19	chr19	54725745	54725745	+	Intron	SNP	A	A	G	c.T613C	p.W205R	ENST00000391750
P001	FAM196B	hg19	chr5	169309668	169309668	+	Missense_Mutation	SNP	A	A	C	c.T1235G	p.L412R	ENST00000377365
P001	FOXD4L5	hg19	chr9	70177705	70177705	+	Silent	SNP	C	C	T	c.G279A	p.P93P	ENST00000377420
P001	CD177	hg19	chr19	43859834	43859834	+	Missense_Mutation	SNP	C	C	A	c.C401A	p.P134Q	ENST00000378009
P001	PCDHA7	hg19	chr5	140214381	140214381	+	Missense_Mutation	SNP	G	G	A	c.G413A	p.R138K	ENST00000525929
P001	RP11-830F9.6	hg19	chr16	89016866	89016866	+	Missense_Mutation	SNP	A	A	G	c.A340G	p.I114V	ENST00000378347
P001	RPSAP58	hg19	chr19	24010614	24010614	+	RNA	SNP	T	T	A	c.T651A	p.A217A	ENST00000496398
P001	MUC12	hg19	chr7	100616245	100616245	+	Intron	SNP	C	C	A	c.C208A	p.R70R	ENST00000379442
P001	MUC12	hg19	chr7	100642769	100642769	+	Silent	SNP	G	G	A	c.G9354A	p.S3118S	ENST00000379442
P001	MUC12	hg19	chr7	100616277	100616277	+	Intron	SNP	A	A	G	c.A240G	p.A80A	ENST00000379442
P001	MUC12	hg19	chr7	100616258	100616258	+	Intron	SNP	C	C	T	c.C221T	p.A74V	ENST00000379442
P001	MUC12	hg19	chr7	100616279	100616279	+	Intron	SNP	C	C	G	c.C242G	p.S81C	ENST00000379442
P001	KRTAP10-7	hg19	chr21	46021230	46021230	+	Missense_Mutation	SNP	G	G	A	c.G709A	p.V237I	ENST00000380102
P001	KRTAP10-7	hg19	chr21	46021011	46021011	+	Missense_Mutation	SNP	A	A	G	c.A490G	p.I164V	ENST00000380102
P001	KRTAP10-7	hg19	chr21	46020542	46020542	+	Silent	SNP	T	T	C	c.T21C	p.S7S	ENST00000380102
P001	KRTAP10-2	hg19	chr21	45971162	45971162	+	Silent	SNP	C	C	T	c.G180A	p.A60A	ENST00000391621
P001	KRTAP5-2	hg19	chr11	1619181	1619181	+	Silent	SNP	G	G	A	c.C300T	p.S100S	ENST00000412090
P001	KRTAP5-2	hg19	chr11	1619184	1619184	+	Silent	SNP	G	G	A	c.C297T	p.G99G	ENST00000412090
P001	TRBV10-1	hg19	chr7	142232014	142232014	+	IGR	SNP	C	C	T	c.G9A	p.T3T	ENST00000390364
P001	TRBV10-1	hg19	chr7	142232010	142232010	+	IGR	SNP	G	G	A	c.C13T	p.L5F	ENST00000390364
P001	TRBV10-1	hg19	chr7	142232008	142232008	+	IGR	SNP	G	G	C	c.C15G	p.L5L	ENST00000390364
P001	TRBV10-1	hg19	chr7	142231984	142231984	+	IGR	SNP	C	C	G	c.G39C	p.L13L	ENST00000390364
P001	TRBV10-1	hg19	chr7	142231977	142231977	+	IGR	SNP	C	C	T	c.G46A	p.A16T	ENST00000390364
P001	TRBV11-1	hg19	chr7	142224058	142224058	+	IGR	SNP	C	C	G	c.G109C	p.A37P	ENST00000390367
P001	TRBV11-1	hg19	chr7	142224062	142224062	+	IGR	SNP	G	G	T	c.C105A	p.S35R	ENST00000390367
P001	TRBV11-1	hg19	chr7	142224072	142224072	+	IGR	SNP	G	G	A	c.C95T	p.T32I	ENST00000390367
P001	TRBV11-1	hg19	chr7	142224063	142224063	+	IGR	SNP	C	C	T	c.G104A	p.S35N	ENST00000390367
P001	TRBV11-1	hg19	chr7	142224089	142224089	+	IGR	SNP	G	G	A	c.C78T	p.S26S	ENST00000390367
P001	TRBV5-5	hg19	chr7	142148970	142148970	+	IGR	SNP	A	A	C	c.T301G	p.L101V	ENST00000390372
P001	TRBV5-5	hg19	chr7	142148969	142148969	+	IGR	SNP	A	A	T	c.T302A	p.L101X	ENST00000390372
P001	TRBV5-5	hg19	chr7	142149158	142149158	+	IGR	SNP	A	A	G	c.T113C	p.V38A	ENST00000390372
P001	TRBV5-5	hg19	chr7	142149001	142149001	+	IGR	SNP	G	G	A	c.C270T	p.N90N	ENST00000390372
P001	TRBV5-5	hg19	chr7	142148963	142148963	+	IGR	SNP	C	C	T	c.G308A	p.G103E	ENST00000390372
P001	TRBV7-6	hg19	chr7	142139383	142139383	+	IGR	SNP	T	T	C	c.A242G	p.N81S	ENST00000390374
P001	IGHG4	hg19	chr14	106092401	106092401	+	IGR	SNP	A	A	G	c.T3C	p.A1A	ENST00000390543
P001	IGHV1-2	hg19	chr14	106452847	106452847	+	IGR	SNP	C	C	A	c.G175T	p.A59S	ENST00000390594
P001	IGHV1-2	hg19	chr14	106452801	106452801	+	IGR	SNP	C	C	T	c.G221A	p.S74N	ENST00000390594
P001	IGHV1-2	hg19	chr14	106452925	106452925	+	IGR	SNP	G	G	A	c.C97T	p.P33S	ENST00000390594
P001	IGHV1-2	hg19	chr14	106452852	106452852	+	IGR	SNP	C	C	T	c.G170A	p.R57Q	ENST00000390594
P001	IGHV1-2	hg19	chr14	106452860	106452860	+	IGR	SNP	G	G	A	c.C162T	p.H54H	ENST00000390594
P001	IGHV1-2	hg19	chr14	106452930	106452930	+	IGR	SNP	T	T	C	c.A92G	p.K31R	ENST00000390594
P001	IGHV1-2	hg19	chr14	106452781	106452781	+	IGR	SNP	G	G	T	c.C241A	p.Q81K	ENST00000390594
P001	IGHV1-2	hg19	chr14	106452863	106452863	+	IGR	SNP	C	C	T	c.G159A	p.M53I	ENST00000390594
P001	IGHV1-2	hg19	chr14	106452793	106452793	+	IGR	SNP	T	T	G	c.A229C	p.T77P	ENST00000390594
P001	IGHV1-2	hg19	chr14	106452943	106452943	+	IGR	SNP	C	C	A	c.G79T	p.G27W	ENST00000390594
P001	IGHV1-2	hg19	chr14	106452894	106452894	+	IGR	SNP	G	G	A	c.C128T	p.A43V	ENST00000390594
P001	IGHV1-2	hg19	chr14	106452796	106452796	+	IGR	SNP	C	C	T	c.G226A	p.G76S	ENST00000390594
P001	IGHV1-2	hg19	chr14	106452804	106452804	+	IGR	SNP	T	T	C	c.A218G	p.N73S	ENST00000390594
P001	IGHV1-2	hg19	chr14	106452805	106452805	+	IGR	SNP	T	T	C	c.A217G	p.N73D	ENST00000390594
P001	IGHV1-2	hg19	chr14	106452908	106452908	+	IGR	SNP	C	C	T	c.G114A	p.K38K	ENST00000390594
P001	IGHV1-2	hg19	chr14	106452763	106452763	+	IGR	SNP	C	C	A	c.G259T	p.V87F	ENST00000390594
P001	IGHV1-2	hg19	chr14	106452744	106452744	+	IGR	SNP	G	G	A	c.C278T	p.T93M	ENST00000390594
P001	IGHV1-2	hg19	chr14	106452764	106452764	+	IGR	SNP	C	C	T	c.G258A	p.R86R	ENST00000390594
P001	IGHV1-2	hg19	chr14	106452789	106452789	+	IGR	SNP	T	T	C	c.A233G	p.N78S	ENST00000390594
P001	IGHV1-2	hg19	chr14	106452782	106452782	+	IGR	SNP	T	T	G	c.A240C	p.A80A	ENST00000390594
P001	IGHV3-30	hg19	chr14	106791035	106791035	+	IGR	SNP	A	A	G	c.T321C	p.A107A	ENST00000390613
P001	IGHV3-30	hg19	chr14	106791009	106791009	+	IGR	SNP	G	G	A	c.C347T	p.A116V	ENST00000390613
P001	IGHV3-30	hg19	chr14	106791044	106791044	+	IGR	SNP	G	G	A	c.C312T	p.S104S	ENST00000390613
P001	IGHV3-30	hg19	chr14	106791048	106791048	+	IGR	SNP	T	T	C	c.A308G	p.N103S	ENST00000390613
P001	IGHV3-30	hg19	chr14	106791056	106791056	+	IGR	SNP	C	C	A	c.G300T	p.L100L	ENST00000390613
P001	IGHV3-48	hg19	chr14	106994072	106994072	+	IGR	SNP	T	T	G	c.A93C	p.V31V	ENST00000390624
P001	IGHV3-53	hg19	chr14	107048676	107048676	+	IGR	SNP	G	G	T	c.C344A	p.A115E	ENST00000390627
P001	IGHV3-53	hg19	chr14	107048673	107048673	+	IGR	SNP	C	C	T	c.G347A	p.R116K	ENST00000390627
P001	IGHV3-53	hg19	chr14	107048677	107048677	+	IGR	SNP	C	C	T	c.G343A	p.A115T	ENST00000390627
P001	KRTAP4-11	hg19	chr17	39274435	39274435	+	Missense_Mutation	SNP	A	A	T	c.T133A	p.C45S	ENST00000391413
P001	KRTAP4-11	hg19	chr17	39274415	39274415	+	Silent	SNP	C	C	T	c.G153A	p.R51R	ENST00000391413
P001	KRTAP4-11	hg19	chr17	39274448	39274448	+	Silent	SNP	A	A	G	c.T120C	p.C40C	ENST00000391413
P001	RBM26	hg19	chr2	29004734	29004734	+	Intron	INS	-	-	T	c.172dupT	p.R57fs	ENST00000438737
P001	DBNDD2	hg19	chr11	62494375	62494377	+	In_Frame_Del	DEL	TCC	TCC	-	c.252_254del	p.84_85del	ENST00000372723
P001	EVPLL	hg19	chr17	18286859	18286859	+	Silent	SNP	C	C	T	c.C834T	p.I278I	ENST00000399134
P001	GOLGA6L6	hg19	chr15	20740209	20740209	+	Missense_Mutation	SNP	C	C	T	c.G1541A	p.R514K	ENST00000427390
P001	GOLGA6L6	hg19	chr15	20740153	20740153	+	Missense_Mutation	SNP	T	T	C	c.A1597G	p.M533V	ENST00000427390
P001	GOLGA6L18	hg19	chr15	82934933	82934933	+	RNA	SNP	T	T	C	c.A647G	p.H216R	ENST00000559949
P001	GOLGA6L18	hg19	chr15	82934850	82934850	+	RNA	SNP	G	G	A	c.C730T	p.R244C	ENST00000559949
P001	GOLGA6L18	hg19	chr15	82934851	82934851	+	RNA	SNP	T	T	C	c.A729G	p.L243L	ENST00000559949
P001	NBPF1	hg19	chr1	16893841	16893841	+	Missense_Mutation	SNP	C	C	T	c.G2672A	p.S891N	ENST00000430580
P001	NBPF1	hg19	chr1	16891340	16891340	+	Missense_Mutation	SNP	T	T	A	c.A3138T	p.R1046S	ENST00000430580
P001	NBPF1	hg19	chr1	16916476	16916476	+	Missense_Mutation	SNP	G	G	C	c.C196G	p.L66V	ENST00000430580
P001	PLXNA4	hg19	chr7	131982975	131982975	+	Missense_Mutation	SNP	C	C	A	c.G1378T	p.V460L	ENST00000359827
P001	KRTAP1-3	hg19	chr17	39191003	39191003	+	Missense_Mutation	SNP	C	C	G	c.G71C	p.C24S	ENST00000344363
P001	OR2F2	hg19	chr7	143633122	143633122	+	Missense_Mutation	SNP	C	C	A	c.C797A	p.P266H	ENST00000408955
P001	C21orf140	hg19	chr21	35773276	35773276	+	Missense_Mutation	SNP	G	G	T	c.C95A	p.T32N	ENST00000410005
P001	POTEG	hg19	chr14	19553530	19553530	+	Silent	SNP	C	C	T	c.C114T	p.S38S	ENST00000552966
P001	FRG2B	hg19	chr10	135438810	135438810	+	Silent	SNP	G	G	A	c.C633T	p.L211L	ENST00000443774
P001	FRG2B	hg19	chr10	135439079	135439079	+	Missense_Mutation	SNP	A	A	T	c.T364A	p.S122T	ENST00000443774
P001	MUC3A	hg19	chr7	100550206	100550206	+	Missense_Mutation	SNP	A	A	G	c.A787G	p.I263V	ENST00000379458
P001	PRB4	hg19	chr12	11461722	11461722	+	Silent	SNP	T	T	G	c.A195C	p.G65G	ENST00000535904
P001	PRB4	hg19	chr12	11461633	11461633	+	Missense_Mutation	SNP	T	T	G	c.A284C	p.H95P	ENST00000535904
P001	OR52I1	hg19	chr11	4615474	4615474	+	Missense_Mutation	SNP	T	T	C	c.T278C	p.V93A	ENST00000450052
P001	HLA-B	hg19	chr6	31324686	31324686	+	Missense_Mutation	SNP	C	C	G	c.G122C	p.R41P	ENST00000412585
P001	TMEM30C	hg19	chr3	99904579	99904579	+	5'Flank	SNP	G	G	T	c.G49T	p.A17S	ENST00000429523
P001	KDM4E	hg19	chr11	94758844	94758844	+	Silent	SNP	T	T	C	c.T123C	p.H41H	ENST00000450979
P001	KDM4E	hg19	chr11	94758846	94758846	+	Missense_Mutation	SNP	A	A	G	c.A125G	p.Q42R	ENST00000450979
P001	ZBTB22	hg19	chr6	33283242	33283242	+	Missense_Mutation	SNP	C	C	A	c.G1452T	p.K484N	ENST00000431845
P001	ZNF737	hg19	chr19	20727619	20727619	+	Missense_Mutation	SNP	A	A	T	c.T1390A	p.S464T	ENST00000427401
P001	ZNF737	hg19	chr19	20727643	20727643	+	Missense_Mutation	SNP	C	C	T	c.G1366A	p.E456K	ENST00000427401
P001	ZNF737	hg19	chr19	20727605	20727605	+	Silent	SNP	A	A	G	c.T1404C	p.L468L	ENST00000427401
P001	ZNF737	hg19	chr19	20727618	20727618	+	Missense_Mutation	SNP	G	G	C	c.C1391G	p.S464W	ENST00000427401
P001	ZNF737	hg19	chr19	20727556	20727556	+	Missense_Mutation	SNP	G	G	C	c.C1453G	p.R485G	ENST00000427401
P001	ZNF737	hg19	chr19	20727628	20727628	+	Missense_Mutation	SNP	C	C	A	c.G1381T	p.A461S	ENST00000427401
P001	ZNF737	hg19	chr19	20727620	20727620	+	Missense_Mutation	SNP	G	G	C	c.C1389G	p.N463K	ENST00000427401
P001	ZNF737	hg19	chr19	20727604	20727604	+	Missense_Mutation	SNP	T	T	C	c.A1405G	p.T469A	ENST00000427401
P001	ZNF737	hg19	chr19	20727673	20727673	+	Missense_Mutation	SNP	T	T	C	c.A1336G	p.I446V	ENST00000427401
P001	ZNF737	hg19	chr19	20727623	20727623	+	Silent	SNP	G	G	A	c.C1386T	p.F462F	ENST00000427401
P001	ZNF737	hg19	chr19	20727617	20727617	+	Silent	SNP	C	C	T	c.G1392A	p.S464S	ENST00000427401
P001	ZNF737	hg19	chr19	20727555	20727555	+	Missense_Mutation	SNP	C	C	T	c.G1454A	p.R485Q	ENST00000427401
P001	IGKV1D-8	hg19	chr2	90259776	90259776	+	IGR	SNP	G	G	A	c.G3A	p.M1I	ENST00000471857
P001	TDGF1	hg19	chr3	46621449	46621449	+	Missense_Mutation	SNP	G	G	T	c.G299T	p.G100V	ENST00000542931
P001	KRTAP5-4	hg19	chr11	1642989	1642989	+	Missense_Mutation	SNP	C	C	A	c.G335T	p.G112V	ENST00000399682
P001	KRTAP5-4	hg19	chr11	1643066	1643066	+	Silent	SNP	A	A	G	c.T258C	p.G86G	ENST00000399682
P001	SLC9A5	hg19	chr22	18314825	18314827	+	In_Frame_Del	DEL	CTC	CTC	-	c.2848_2850del	p.950_950del	ENST00000299798
P001	NBPF15	hg19	chr1	148579607	148579607	+	Silent	SNP	A	A	G	c.A177G	p.K59K	ENST00000442702
P001	ANKRD44	hg19	chr20	44038638	44038640	+	In_Frame_Del	DEL	CCT	CCT	-	c.344_346del	p.115_116del	ENST00000409153
P001	USP17L22	hg19	chr4	9270328	9270328	+	Nonsense_Mutation	SNP	G	G	A	c.G984A	p.W328X	ENST00000511280
P001	SHANK3	hg19	chr22	51117800	51117800	+	Missense_Mutation	SNP	G	G	A	c.G829A	p.G277R	ENST00000445220
P001	SHANK3	hg19	chr22	51117811	51117811	+	Silent	SNP	C	C	T	c.C840T	p.N280N	ENST00000445220
P001	SHANK3	hg19	chr22	51117830	51117830	+	Silent	SNP	C	C	T	c.C859T	p.L287L	ENST00000445220
P001	SHANK3	hg19	chr22	51117766	51117766	+	Silent	SNP	T	T	C	c.T795C	p.H265H	ENST00000445220
P001	SHANK3	hg19	chr22	51117787	51117787	+	Silent	SNP	T	T	C	c.T816C	p.Y272Y	ENST00000445220
P001	PRB1	hg19	chr12	11506830	11506830	+	Silent	SNP	T	T	C	c.A207G	p.Q69Q	ENST00000546254
P001	PRB1	hg19	chr12	11506785	11506785	+	Silent	SNP	C	C	T	c.G252A	p.G84G	ENST00000546254
P001	PRB1	hg19	chr12	11506774	11506774	+	Missense_Mutation	SNP	C	C	T	c.G263A	p.R88Q	ENST00000546254
P001	GOLGA6L19	hg19	chr15	83014106	83014106	+	Silent	SNP	T	T	C	c.A477G	p.V159V	ENST00000557886
P001	AC019206.1	hg19	chr2	70129794	70129794	+	Intron	SNP	G	G	T	c.C48A	p.S16R	ENST00000599032
P001	C19orf26	hg19	chr1	101456193	101456193	+	Intron	DEL	A	A	-	c.187delA	p.K63fs	ENST00000590083
P001	MDFIC	hg19	chr12	42627991	42628006	+	3'UTR	DEL	AAAGAGAAAAGAAAAG	AAAGAGAAAAGAAAAG	-	c.51_66del	p.K17fs	ENST00000257724
P001	MUC8	hg19	chr12	133049441	133049441	+	IGR	SNP	C	C	T	c.G820A	p.G274R	ENST00000595994
P001	MUC8	hg19	chr12	133049571	133049571	+	IGR	SNP	G	G	A	c.C694T	p.L232F	ENST00000595994
P002	SEMA3F	hg19	chr3	50225431	50225431	+	Silent	SNP	G	G	A	c.G2241A	p.Q747Q	ENST00000002829
P002	SLC12A2	hg19	chr4	17586584	17586600	+	In_Frame_Del	DEL	TCTTCTGCCAGTGGGGA	TCTTCTGCCAGTGGGGA	-	c.447_452del	p.149_151del	ENST00000509205
P002	ICA1	hg19	chr7	8196570	8196570	+	Intron	SNP	A	A	G	c.T980C	p.F327S	ENST00000407906
P002	CDC27	hg19	chr17	45234725	45234725	+	Silent	SNP	T	T	C	c.A501G	p.T167T	ENST00000575483
P002	CDC27	hg19	chr17	45234657	45234657	+	Missense_Mutation	SNP	T	T	C	c.A569G	p.N190S	ENST00000575483
P002	CDC27	hg19	chr17	45234707	45234707	+	Missense_Mutation	SNP	T	T	A	c.A519T	p.L173F	ENST00000575483
P002	CDC27	hg19	chr17	45234645	45234645	+	Missense_Mutation	SNP	G	G	C	c.C581G	p.S194C	ENST00000575483
P002	CDC27	hg19	chr17	45234626	45234626	+	Silent	SNP	T	T	G	c.A600C	p.T200T	ENST00000575483
P002	ITGAL	hg19	chr16	30485480	30485480	+	Intron	SNP	T	T	C	c.T256C	p.S86P	ENST00000562652
P002	CACNA1G	hg19	chr17	48655574	48655574	+	Silent	SNP	C	C	T	c.C1950T	p.I650I	ENST00000515765
P002	USH1C	hg19	chr11	17531208	17531208	+	Missense_Mutation	SNP	A	A	G	c.T1708C	p.S570P	ENST00000005226
P002	SLC6A13	hg19	chr12	333593	333593	+	Missense_Mutation	SNP	C	C	A	c.G1147T	p.V383F	ENST00000343164
P002	ABHD5	hg19	chr3	43753315	43753315	+	Silent	SNP	C	C	T	c.C621T	p.P207P	ENST00000458276
P002	PIK3C2A	hg19	chr11	17156464	17156464	+	Silent	SNP	G	G	C	c.C870G	p.A290A	ENST00000540361
P002	DDX11	hg19	chr12	31244665	31244665	+	Missense_Mutation	SNP	C	C	T	c.C1102T	p.P368S	ENST00000545668
P002	IQSEC2	hg19	chr2	214012404	214012405	+	Intron	DEL	AA	AA	-	c.184_185del	p.L62fs	ENST00000396435
P002	BEST2	hg19	chr19	12865496	12865496	+	Silent	SNP	C	C	T	c.C378T	p.R126R	ENST00000553030
P002	USH2A	hg19	chr1	216062173	216062173	+	Missense_Mutation	SNP	T	T	A	c.A7818T	p.K2606N	ENST00000366943
P002	SLC19A1	hg19	chr10	115804766	115804768	+	In_Frame_Del	DEL	CCG	CCG	-	c.875_877del	p.292_293del	ENST00000567670
P002	CNTLN	hg19	chr9	17415970	17415970	+	Missense_Mutation	SNP	G	G	C	c.G2897C	p.R966T	ENST00000425824
P002	HSPA5	hg19	chr9	128003096	128003096	+	Missense_Mutation	SNP	T	T	A	c.A213T	p.E71D	ENST00000324460
P002	ELN	hg19	chr7	73466082	73466082	+	Missense_Mutation	SNP	G	G	C	c.G802C	p.A268P	ENST00000445912
P002	MCUR1	hg19	chr6	13814651	13814651	+	Missense_Mutation	SNP	C	C	T	c.G11A	p.G4D	ENST00000488770
P002	TBC1D22A	hg19	chr22	47185223	47185223	+	Intron	SNP	T	T	C	c.T77C	p.L26P	ENST00000441936
P002	KCNH2	hg19	chr7	150644513	150644513	+	Missense_Mutation	SNP	T	T	G	c.A3055C	p.T1019P	ENST00000262186
P002	KMT2C	hg19	chr7	151932919	151932919	+	Missense_Mutation	SNP	C	C	A	c.G2752T	p.A918S	ENST00000355193
P002	DCBLD2	hg19	chr3	98620166	98620166	+	Missense_Mutation	SNP	G	G	A	c.C5T	p.A2V	ENST00000326857
P002	TMCC3	hg19	chr12	94975951	94975951	+	Missense_Mutation	SNP	C	C	T	c.G349A	p.A117T	ENST00000551457
P002	ZNF703	hg19	chr5	127419932	127419934	+	In_Frame_Del	DEL	GCG	GCG	-	c.286_288del	p.96_96del	ENST00000331569
P002	TRPV2	hg19	chr6	34857319	34857321	+	In_Frame_Del	DEL	GCG	GCG	-	c.140_142del	p.47_48del	ENST00000338560
P002	MYO9A	hg19	chr15	72292242	72292242	+	Missense_Mutation	SNP	T	T	G	c.A1420C	p.K474Q	ENST00000564571
P002	GPKOW	hg19	chrX	48976081	48976081	+	Missense_Mutation	SNP	C	C	A	c.G543T	p.E181D	ENST00000156109
P002	PPP2R5B	hg19	chr11	64693278	64693278	+	Silent	SNP	A	A	C	c.A72C	p.P24P	ENST00000526559
P002	PYGM	hg19	chr11	64522169	64522169	+	Missense_Mutation	SNP	T	T	C	c.A995G	p.D332G	ENST00000164139
P002	PABPC1	hg19	chr8	101717237	101717237	+	Missense_Mutation	SNP	C	C	T	c.G1639A	p.G547S	ENST00000522387
P002	PABPC1	hg19	chr8	101717195	101717195	+	Missense_Mutation	SNP	G	G	C	c.C1681G	p.L561V	ENST00000522387
P002	PABPC1	hg19	chr8	101719201	101719201	+	Missense_Mutation	SNP	A	A	G	c.T1265C	p.I422T	ENST00000522387
P002	PABPC1	hg19	chr8	101719138	101719138	+	Missense_Mutation	SNP	C	C	T	c.G1328A	p.R443Q	ENST00000522387
P002	PABPC1	hg19	chr8	101717220	101717220	+	Missense_Mutation	SNP	C	C	T	c.G1656A	p.M552I	ENST00000522387
P002	PABPC1	hg19	chr8	101717255	101717255	+	Missense_Mutation	SNP	T	T	A	c.A1621T	p.M541L	ENST00000522387
P002	RUNX2	hg19	chr5	149776147	149776149	+	In_Frame_Del	DEL	AAG	AAG	-	c.4195_4197del	p.1399_1399del	ENST00000541979
P002	LLGL2	hg19	chr17	73560623	73560623	+	Nonstop_Mutation	SNP	G	G	T	c.G1071T	p.X357Y	ENST00000578363
P002	IGF2BP2	hg19	chr3	185540987	185540987	+	Missense_Mutation	SNP	G	G	A	c.C193T	p.H65Y	ENST00000457616
P002	NOTCH3	hg19	chr19	15298782	15298782	+	Silent	SNP	G	G	A	c.C1513T	p.L505L	ENST00000601011
P002	ZNF638	hg19	chr2	71661930	71661930	+	Missense_Mutation	SNP	C	C	G	c.C5930G	p.S1977C	ENST00000409544
P002	LRP2	hg19	chr2	170072921	170072921	+	Missense_Mutation	SNP	G	G	T	c.C5668A	p.Q1890K	ENST00000263816
P002	RAB10	hg19	chr2	26357859	26357859	+	Missense_Mutation	SNP	G	G	T	c.G572T	p.G191V	ENST00000264710
P002	ATRX	hg19	chrX	76937377	76937377	+	Missense_Mutation	SNP	G	G	T	c.C3371A	p.S1124Y	ENST00000373344
P002	SEH1L	hg19	chr18	12955467	12955467	+	Silent	SNP	T	T	C	c.T90C	p.H30H	ENST00000592170
P002	TTC39A	hg19	chr1	51768835	51768835	+	Silent	SNP	T	T	C	c.A684G	p.G228G	ENST00000451380
P002	NID2	hg19	chr14	52535572	52535572	+	Silent	SNP	G	G	A	c.C141T	p.L47L	ENST00000216286
P002	LZTS3	hg19	chr20	3145378	3145378	+	Missense_Mutation	SNP	C	C	T	c.G1606A	p.A536T	ENST00000360342
P002	ARHGAP4	hg19	chrX	153186977	153186977	+	Silent	SNP	C	C	T	c.G207A	p.K69K	ENST00000537206
P002	PITPNM3	hg19	chr17	6374529	6374529	+	Missense_Mutation	SNP	C	C	T	c.G1576A	p.E526K	ENST00000262483
P002	HNRNPC	hg19	chr14	21679666	21679666	+	Missense_Mutation	SNP	C	C	T	c.G736A	p.E246K	ENST00000420743
P002	HNRNPC	hg19	chr14	21679677	21679677	+	Missense_Mutation	SNP	A	A	G	c.T725C	p.V242A	ENST00000420743
P002	HNRNPC	hg19	chr14	21679678	21679678	+	Missense_Mutation	SNP	C	C	A	c.G724T	p.V242L	ENST00000420743
P002	HNRNPC	hg19	chr14	21679660	21679660	+	Missense_Mutation	SNP	T	T	G	c.A742C	p.N248H	ENST00000420743
P002	HNRNPC	hg19	chr14	21679689	21679689	+	Missense_Mutation	SNP	C	C	G	c.G713C	p.S238T	ENST00000420743
P002	HNRNPC	hg19	chr14	21679620	21679620	+	Missense_Mutation	SNP	G	G	A	c.C782T	p.A261V	ENST00000420743
P002	HNRNPC	hg19	chr14	21679658	21679658	+	Silent	SNP	A	A	G	c.T744C	p.N248N	ENST00000420743
P002	HNRNPC	hg19	chr14	21679703	21679703	+	Silent	SNP	T	T	A	c.A699T	p.S233S	ENST00000420743
P002	HNRNPC	hg19	chr14	21679670	21679670	+	Silent	SNP	T	T	C	c.A732G	p.K244K	ENST00000420743
P002	DFNB31	hg19	chr9	117267022	117267022	+	Silent	SNP	C	C	T	c.G60A	p.S20S	ENST00000374057
P002	ABL1	hg19	chr9	133761051	133761051	+	Missense_Mutation	SNP	G	G	T	c.G3431T	p.S1144I	ENST00000372348
P002	PCSK5	hg19	chr9	78790138	78790138	+	Intron	SNP	A	A	G	c.A1993G	p.K665E	ENST00000376767
P002	ACPT	hg19	chr22	21343966	21344002	+	In_Frame_Del	DEL	GAGGAGGTGAGGGGCGTGGGGAGCCAGGGCGCAGGTA	GAGGAGGTGAGGGGCGTGGGGAGCCAGGGCGCAGGTA	-	c.646_651del	p.216_217del	ENST00000270594
P002	MICALL1	hg19	chr22	38318361	38318361	+	Missense_Mutation	SNP	A	A	C	c.A952C	p.T318P	ENST00000215957
P002	TTC28	hg19	chr22	28492244	28492244	+	Missense_Mutation	SNP	C	C	T	c.G3700A	p.G1234R	ENST00000397906
P002	POLR3H	hg19	chr22	41939770	41939770	+	Intron	SNP	T	T	C	c.A336G	p.L112L	ENST00000432789
P002	MLC1	hg19	chr22	50502469	50502469	+	Silent	SNP	A	A	G	c.T1053C	p.A351A	ENST00000395876
P002	RBM23	hg19	chr14	23371268	23371268	+	Silent	SNP	A	A	G	c.T1167C	p.A389A	ENST00000359890
P002	SCAF1	hg19	chr14	93397924	93397926	+	In_Frame_Del	DEL	GAG	GAG	-	c.685_687del	p.229_229del	ENST00000360565
P002	ASB2	hg19	chr14	94405580	94405580	+	Silent	SNP	G	G	A	c.C1491T	p.D497D	ENST00000555019
P002	AVP	hg19	chr20	3063408	3063408	+	Missense_Mutation	SNP	G	G	T	c.C363A	p.H121Q	ENST00000380293
P002	CCM2L	hg19	chr20	30605900	30605900	+	Missense_Mutation	SNP	C	C	T	c.C401T	p.T134M	ENST00000300415
P002	PLCB4	hg19	chr20	9370574	9370574	+	Missense_Mutation	SNP	C	C	A	c.C1207A	p.P403T	ENST00000378473
P002	MYL9	hg19	chr20	35177649	35177649	+	Silent	SNP	C	C	T	c.C516T	p.D172D	ENST00000279022
P002	ZNF516	hg19	chr18	74153580	74153580	+	Silent	SNP	C	C	A	c.G1431T	p.P477P	ENST00000443185
P002	H2BFM	hg19	chrX	103294585	103294585	+	Silent	SNP	A	A	T	c.A351T	p.T117T	ENST00000243297
P002	CACNA1F	hg19	chrX	49062979	49062979	+	Missense_Mutation	SNP	C	C	T	c.G5498A	p.R1833K	ENST00000376265
P002	PPM1E	hg19	chr16	597239	597241	+	In_Frame_Del	DEL	AGG	AGG	-	c.401_403del	p.134_135del	ENST00000308249
P002	SALL1	hg19	chr16	51173592	51173592	+	Silent	SNP	G	G	A	c.C2250T	p.S750S	ENST00000570206
P002	GYS1	hg19	chr19	49473849	49473849	+	Missense_Mutation	SNP	C	C	T	c.G1763A	p.R588H	ENST00000323798
P002	PPP1R13L	hg19	chr19	45889348	45889348	+	Missense_Mutation	SNP	G	G	T	c.C1906A	p.L636M	ENST00000418234
P002	ADRB1	hg19	chr19	46299147	46299149	+	In_Frame_Del	DEL	CCT	CCT	-	c.2132_2134del	p.711_712del	ENST00000369295
P002	PTOV1	hg19	chr19	50354348	50354348	+	RNA	SNP	G	G	T	c.G211T	p.A71S	ENST00000594151
P002	LILRB1	hg19	chr19	55145453	55145453	+	Silent	SNP	C	C	T	c.C1341T	p.T447T	ENST00000396331
P002	LILRB1	hg19	chr19	55144141	55144141	+	Silent	SNP	A	A	G	c.A888G	p.R296R	ENST00000396331
P002	LILRB1	hg19	chr19	55144186	55144186	+	Silent	SNP	C	C	T	c.C933T	p.S311S	ENST00000396331
P002	MED26	hg19	chr19	16738706	16738706	+	Nonsense_Mutation	SNP	G	G	A	c.C49T	p.Q17X	ENST00000600060
P002	ETV2	hg19	chr19	36134441	36134441	+	Silent	SNP	C	C	A	c.C501A	p.G167G	ENST00000402764
P002	TMEM59L	hg19	chr19	18723895	18723895	+	Nonsense_Mutation	SNP	C	C	T	c.C127T	p.Q43X	ENST00000600490
P002	SUGP1	hg19	chr19	19427396	19427396	+	Missense_Mutation	SNP	G	G	A	c.C41T	p.A14V	ENST00000588731
P002	SIPA1L3	hg19	chr19	38673317	38673317	+	Missense_Mutation	SNP	C	C	A	c.C4367A	p.P1456Q	ENST00000222345
P002	LMBR1	hg19	chr7	156529243	156529243	+	Intron	SNP	C	C	G	c.G818C	p.G273A	ENST00000415428
P002	PPP1R17	hg19	chr7	31746839	31746839	+	Missense_Mutation	SNP	A	A	G	c.A410G	p.E137G	ENST00000342032
P002	CLIP2	hg19	chr7	73790292	73790292	+	Nonsense_Mutation	SNP	G	G	T	c.G1561T	p.E521X	ENST00000223398
P002	PRUNE2	hg19	chr9	79321098	79321098	+	Missense_Mutation	SNP	G	G	C	c.C5015G	p.P1672R	ENST00000428286
P002	TNKS2	hg19	chr10	93558528	93558528	+	Silent	SNP	G	G	A	c.G81A	p.E27E	ENST00000371627
P002	RAI1	hg19	chr17	17697096	17697096	+	Missense_Mutation	SNP	G	G	C	c.G834C	p.Q278H	ENST00000353383
P002	CHGA	hg19	chr17	36104805	36104811	+	Frame_Shift_Del	DEL	TCCTTGG	TCCTTGG	-	c.65_71del	p.T22fs	ENST00000216492
P002	UBE2D3	hg19	chr4	103789889	103789889	+	Missense_Mutation	SNP	G	G	C	c.C13G	p.R5G	ENST00000357194
P002	FRG1	hg19	chr4	190876250	190876250	+	Missense_Mutation	SNP	G	G	A	c.G187A	p.V63I	ENST00000531991
P002	FRG1	hg19	chr4	190876247	190876247	+	Missense_Mutation	SNP	G	G	C	c.G184C	p.V62L	ENST00000531991
P002	HSPA8	hg19	chr11	122929025	122929025	+	Missense_Mutation	SNP	C	C	T	c.G1690A	p.D564N	ENST00000534624
P002	UNC93B1	hg19	chr11	67759287	67759287	+	Silent	SNP	C	C	A	c.G1521T	p.A507A	ENST00000227471
P002	NDUFS8	hg19	chr11	67799635	67799635	+	Missense_Mutation	SNP	C	C	A	c.C17A	p.T6K	ENST00000453471
P002	KRT18	hg19	chr12	53343099	53343099	+	Missense_Mutation	SNP	G	G	A	c.G142A	p.V48M	ENST00000550600
P002	KRT18	hg19	chr12	53343124	53343124	+	Missense_Mutation	SNP	G	G	A	c.G167A	p.G56D	ENST00000550600
P002	KRT18	hg19	chr12	53343152	53343152	+	Silent	SNP	C	C	G	c.C195G	p.T65T	ENST00000550600
P002	KRT18	hg19	chr12	53343158	53343158	+	Missense_Mutation	SNP	A	A	G	c.A201G	p.I67M	ENST00000550600
P002	PODXL	hg19	chr12	53343131	53343131	+	Frame_Shift_Ins	INS	-	-	A	c.174_175insA	p.M58fs	ENST00000541194
P002	KRT18	hg19	chr12	53343132	53343132	+	Missense_Mutation	SNP	G	G	T	c.G175T	p.G59W	ENST00000550600
P002	KRT18	hg19	chr12	53343120	53343120	+	Silent	SNP	A	A	C	c.A163C	p.R55R	ENST00000550600
P002	KRT18	hg19	chr12	53343148	53343148	+	Missense_Mutation	SNP	C	C	G	c.C191G	p.A64G	ENST00000550600
P002	KRT18	hg19	chr12	53343134	53343134	+	Silent	SNP	G	G	T	c.G177T	p.G59G	ENST00000550600
P002	KRT18	hg19	chr12	53343098	53343098	+	Silent	SNP	C	C	T	c.C141T	p.S47S	ENST00000550600
P002	KRT18	hg19	chr12	53343209	53343209	+	Missense_Mutation	SNP	G	G	A	c.G252A	p.M84I	ENST00000550600
P002	KRT18	hg19	chr12	53343105	53343105	+	Missense_Mutation	SNP	C	C	T	c.C148T	p.R50C	ENST00000550600
P002	KIAA1244	hg19	chr6	138601228	138601228	+	Silent	SNP	G	G	A	c.G2388A	p.R796R	ENST00000251691
P002	TCOF1	hg19	chr6	41621169	41621171	+	In_Frame_Del	DEL	CTG	CTG	-	c.597_599del	p.199_200del	ENST00000451292
P002	TBP	hg19	chr6	170871049	170871049	+	Silent	SNP	G	G	A	c.G225A	p.Q75Q	ENST00000423353
P002	PCDHB2	hg19	chr5	140475862	140475862	+	Silent	SNP	G	G	A	c.G1488A	p.Q496Q	ENST00000194155
P002	C11orf80	hg19	chr3	51972181	51972183	+	In_Frame_Del	DEL	CTC	CTC	-	c.208_210del	p.70_70del	ENST00000360962
P002	ITGA4	hg19	chr2	182386950	182386950	+	Missense_Mutation	SNP	G	G	A	c.G1955A	p.G652E	ENST00000397033
P002	GRIN3B	hg19	chr19	1008289	1008289	+	Missense_Mutation	SNP	A	A	G	c.A2465G	p.E822G	ENST00000234389
P002	ATP6V1B1	hg19	chr2	71185245	71185245	+	Missense_Mutation	SNP	G	G	C	c.G244C	p.E82Q	ENST00000432367
P002	OPRD1	hg19	chr1	29139006	29139006	+	Silent	SNP	G	G	A	c.G111A	p.P37P	ENST00000234961
P002	KDM5B	hg19	chr1	202725588	202725588	+	Silent	SNP	C	C	T	c.G1362A	p.E454E	ENST00000367264
P002	RPS6KA1	hg19	chr1	26882080	26882080	+	Missense_Mutation	SNP	C	C	T	c.C604T	p.R202W	ENST00000526792
P002	VPS37B	hg19	chr19	45912490	45912492	+	In_Frame_Del	DEL	AAG	AAG	-	c.1270_1272del	p.424_424del	ENST00000535765
P002	LUC7L2	hg19	chr1	231299471	231299473	+	In_Frame_Del	DEL	GCC	GCC	-	c.756_758del	p.252_253del	ENST00000541515
P002	SET	hg19	chr9	131451862	131451862	+	Missense_Mutation	SNP	A	A	C	c.A1C	p.M1L	ENST00000322030
P002	DENND1A	hg19	chr9	126144428	126144428	+	Silent	SNP	G	G	A	c.C2313T	p.G771G	ENST00000373624
P002	CCDC176	hg19	chr14	74489820	74489820	+	Missense_Mutation	SNP	G	G	T	c.G258T	p.K86N	ENST00000394009
P002	CCDC176	hg19	chr14	74489828	74489828	+	Missense_Mutation	SNP	A	A	G	c.A266G	p.D89G	ENST00000394009
P002	IRF2BPL	hg19	chr14	77493805	77493805	+	Nonsense_Mutation	SNP	G	G	A	c.C331T	p.Q111X	ENST00000238647
P002	IRF2BPL	hg19	chr14	77493784	77493784	+	Nonsense_Mutation	SNP	G	G	A	c.C352T	p.Q118X	ENST00000238647
P002	IRF2BPL	hg19	chr14	77493800	77493800	+	Silent	SNP	C	C	T	c.G336A	p.Q112Q	ENST00000238647
P002	PRB2	hg19	chr12	11546764	11546764	+	Missense_Mutation	SNP	G	G	T	c.C248A	p.P83Q	ENST00000389362
P002	PRB2	hg19	chr12	11546808	11546808	+	Silent	SNP	A	A	G	c.T204C	p.P68P	ENST00000389362
P002	PRB2	hg19	chr12	11546686	11546686	+	Missense_Mutation	SNP	C	C	T	c.G326A	p.R109Q	ENST00000389362
P002	PSPC1	hg19	chr13	20356747	20356747	+	Missense_Mutation	SNP	C	C	T	c.G151A	p.A51T	ENST00000427943
P002	ZMYM2	hg19	chr13	20567534	20567534	+	Missense_Mutation	SNP	T	T	C	c.T322C	p.S108P	ENST00000382874
P002	GHSR	hg19	chr3	172165605	172165605	+	Missense_Mutation	SNP	G	G	A	c.C599T	p.P200L	ENST00000427970
P002	OPN4	hg19	chr10	88422152	88422152	+	Missense_Mutation	SNP	G	G	A	c.G1250A	p.R417Q	ENST00000443292
P002	NBPF14	hg19	chr1	148011037	148011037	+	Missense_Mutation	SNP	C	C	G	c.G1585C	p.D529H	ENST00000369219
P002	NFE2	hg19	chr12	54686543	54686543	+	Missense_Mutation	SNP	G	G	A	c.C737T	p.P246L	ENST00000553070
P002	ESX1	hg19	chrX	103495171	103495171	+	Missense_Mutation	SNP	G	G	C	c.C959G	p.P320R	ENST00000372588
P002	LPGAT1	hg19	chr1	211956712	211956712	+	Missense_Mutation	SNP	G	G	C	c.C586G	p.Q196E	ENST00000366997
P002	MICALCL	hg19	chr20	46279837	46279839	+	In_Frame_Del	DEL	CAG	CAG	-	c.3751_3753del	p.1251_1251del	ENST00000256186
P002	SEMG2	hg19	chr20	43851054	43851054	+	Silent	SNP	C	C	T	c.C781T	p.L261L	ENST00000372769
P002	ZNFX1	hg19	chr20	47887686	47887686	+	Silent	SNP	C	C	T	c.G663A	p.L221L	ENST00000396105
P002	PLXNB3	hg19	chrX	53264131	53264133	+	In_Frame_Del	DEL	TGG	TGG	-	c.3735_3737del	p.1245_1246del	ENST00000538966
P002	TRIP10	hg19	chr19	6746051	6746051	+	Silent	SNP	A	A	C	c.A996C	p.P332P	ENST00000313244
P002	VASP	hg19	chr19	46025671	46025671	+	Silent	SNP	A	A	C	c.A552C	p.P184P	ENST00000245932
P002	FOXA2	hg19	chr20	22563583	22563583	+	Silent	SNP	C	C	T	c.G279A	p.S93S	ENST00000377115
P002	CDK9	hg19	chr20	6759656	6759675	+	Frame_Shift_Del	DEL	ATGCTGTACCTTGACGAGAA	ATGCTGTACCTTGACGAGAA	-	c.1111_1130del	p.M371fs	ENST00000421939
P002	CAPNS1	hg19	chr19	36632054	36632054	+	Silent	SNP	C	C	T	c.C141T	p.G47G	ENST00000592483
P002	IRF3	hg19	chr19	50167982	50167982	+	Nonsense_Mutation	SNP	C	C	T	c.G114A	p.W38X	ENST00000601809
P002	CAPN15	hg19	chr19	50156709	50156711	+	In_Frame_Del	DEL	GGA	GGA	-	c.3063_3065del	p.1021_1022del	ENST00000219611
P002	ZIC3	hg19	chr19	50155567	50155569	+	In_Frame_Del	DEL	AAG	AAG	-	c.1921_1923del	p.641_641del	ENST00000370606
P002	RRP9	hg19	chr14	99641544	99641546	+	In_Frame_Del	DEL	CTC	CTC	-	c.1627_1629del	p.543_543del	ENST00000232888
P002	OR7C1	hg19	chr19	14910790	14910790	+	Silent	SNP	G	G	A	c.C159T	p.S53S	ENST00000248073
P002	A4GALT	hg19	chr22	43089751	43089751	+	Silent	SNP	T	T	G	c.A207C	p.P69P	ENST00000401850
P002	HBZ	hg19	chr7	131241050	131241050	+	In_Frame_Ins	INS	-	-	GACGGT	c.68_69insACCGTC	p.S23delinsSPS	ENST00000252951
P002	WDFY4	hg19	chr10	50177147	50177147	+	Missense_Mutation	SNP	G	G	A	c.G8623A	p.G2875R	ENST00000325239
P002	LOXL1	hg19	chr15	74220064	74220064	+	Missense_Mutation	SNP	G	G	A	c.G940A	p.A314T	ENST00000566011
P002	USP6	hg19	chr17	5038533	5038533	+	Silent	SNP	A	A	C	c.A499C	p.R167R	ENST00000574788
P002	TTI2	hg19	chr8	33370128	33370128	+	Nonsense_Mutation	SNP	C	C	A	c.G4T	p.E2X	ENST00000523305
P002	RBM10	hg19	chr19	38899502	38899504	+	In_Frame_Del	DEL	AAG	AAG	-	c.1030_1032del	p.344_344del	ENST00000377604
P002	TXNDC5	hg19	chr19	18391796	18391798	+	In_Frame_Del	DEL	CGG	CGG	-	c.497_499del	p.166_167del	ENST00000379757
P002	JUND	hg19	chr19	18391600	18391600	+	Missense_Mutation	SNP	C	C	T	c.G140A	p.G47E	ENST00000600972
P002	GPRIN2	hg19	chr16	203950	203950	+	Frame_Shift_Ins	INS	-	-	GTCC	c.155_156insGTCC	p.G52fs	ENST00000374317
P002	LAMA5	hg19	chr20	60886768	60886768	+	Silent	SNP	C	C	T	c.G9708A	p.P3236P	ENST00000252999
P002	CCL25	hg19	chr19	8122715	8122715	+	Missense_Mutation	SNP	C	C	A	c.C353A	p.S118Y	ENST00000253451
P002	SLC34A1	hg19	chr5	176825204	176825204	+	Silent	SNP	A	A	C	c.A1837C	p.R613R	ENST00000324417
P002	DIAPH1	hg19	chr5	140953350	140953350	+	Silent	SNP	T	T	G	c.A2004C	p.P668P	ENST00000398562
P002	CHSY1	hg19	chr15	101791359	101791359	+	Silent	SNP	C	C	G	c.G303C	p.R101R	ENST00000254190
P002	EMILIN2	hg19	chr18	2891472	2891472	+	Missense_Mutation	SNP	A	A	C	c.A1347C	p.K449N	ENST00000254528
P002	POPDC3	hg19	chr6	105609762	105609762	+	Nonsense_Mutation	SNP	C	C	T	c.G23A	p.W8X	ENST00000254765
P002	FAM83F	hg19	chr22	40391275	40391275	+	Missense_Mutation	SNP	G	G	A	c.G229A	p.A77T	ENST00000333407
P002	FAM155A	hg19	chr11	12316384	12316389	+	In_Frame_Del	DEL	CTCCTA	CTCCTA	-	c.1406_1411del	p.469_471del	ENST00000375915
P002	KLHL36	hg19	chr16	84691528	84691528	+	Missense_Mutation	SNP	C	C	A	c.C1115A	p.P372H	ENST00000564996
P002	ANKRD36	hg19	chr2	97915895	97915895	+	Silent	SNP	T	T	C	c.T5817C	p.F1939F	ENST00000461153
P002	ANKRD36	hg19	chr2	97915896	97915896	+	Missense_Mutation	SNP	G	G	A	c.G5818A	p.E1940K	ENST00000461153
P002	STAB2	hg19	chr12	104056702	104056702	+	Missense_Mutation	SNP	G	G	A	c.G1948A	p.G650R	ENST00000388887
P002	FNDC1	hg19	chr13	47127609	47127611	+	In_Frame_Del	DEL	CCA	CCA	-	c.78_80del	p.26_27del	ENST00000297267
P002	HS6ST1	hg19	chr2	129076131	129076131	+	Silent	SNP	G	G	T	c.C7A	p.R3R	ENST00000259241
P002	HS6ST1	hg19	chr2	129075797	129075797	+	Missense_Mutation	SNP	A	A	C	c.T341G	p.V114G	ENST00000259241
P002	KCNMA1	hg19	chr9	130548353	130548355	+	5'UTR	DEL	GCG	GCG	-	c.277_279del	p.93_93del	ENST00000481070
P002	SCAF1	hg19	chr6	42897358	42897360	+	In_Frame_Del	DEL	TGC	TGC	-	c.50_52del	p.17_18del	ENST00000360565
P002	KIAA0319	hg19	chr6	24563616	24563616	+	Silent	SNP	G	G	C	c.C2535G	p.V845V	ENST00000535378
P002	LRPPRC	hg19	chr2	44187767	44187767	+	Nonsense_Mutation	SNP	C	C	A	c.G1495T	p.G499X	ENST00000409946
P002	ASNSD1	hg19	chr2	190531877	190531877	+	Missense_Mutation	SNP	A	A	G	c.A1019G	p.D340G	ENST00000260952
P002	USP8	hg19	chr15	50784955	50784955	+	Missense_Mutation	SNP	C	C	A	c.C2292A	p.N764K	ENST00000433963
P002	BBS7	hg19	chr4	122768623	122768623	+	Missense_Mutation	SNP	C	C	T	c.G973A	p.E325K	ENST00000506636
P002	TDG	hg19	chr12	104376608	104376608	+	Silent	SNP	G	G	A	c.G498A	p.E166E	ENST00000266775
P002	LAP3	hg19	chr12	123351892	123351892	+	Frame_Shift_Del	DEL	G	G	-	c.623delC	p.P208fs	ENST00000606142
P002	WDR89	hg19	chr14	64066472	64066472	+	Silent	SNP	T	T	G	c.A189C	p.L63L	ENST00000554717
P002	WDR89	hg19	chr14	64066471	64066471	+	Nonsense_Mutation	SNP	G	G	A	c.C190T	p.R64X	ENST00000554717
P002	PCSK6	hg19	chr15	101983795	101983795	+	Missense_Mutation	SNP	C	C	T	c.G365A	p.R122K	ENST00000398181
P002	2020-09-12	hg19	chr16	4834066	4834066	+	Nonsense_Mutation	SNP	C	C	T	c.G378A	p.W126X	ENST00000587603
P002	ZFHX3	hg19	chr16	72827457	72827457	+	Missense_Mutation	SNP	G	G	A	c.C9124T	p.H3042Y	ENST00000268489
P002	C17orf64	hg19	chr17	58503635	58503635	+	Silent	SNP	G	G	A	c.G156A	p.G52G	ENST00000474834
P002	SS18	hg19	chr18	23615857	23615857	+	Missense_Mutation	SNP	G	G	A	c.C842T	p.S281L	ENST00000542420
P002	TP53	hg19	chr17	7578394	7578394	+	Missense_Mutation	SNP	T	T	C	c.A536G	p.H179R	ENST00000455263
P002	CCDC40	hg19	chr17	78064015	78064015	+	Missense_Mutation	SNP	G	G	C	c.G2910C	p.K970N	ENST00000374877
P002	TMC6	hg19	chr17	76121918	76121918	+	Missense_Mutation	SNP	G	G	T	c.C319A	p.Q107K	ENST00000592594
P002	PTPN14	hg19	chr19	13319692	13319694	+	In_Frame_Del	DEL	GAT	GAT	-	c.6659_6661del	p.2220_2221del	ENST00000366956
P002	FAM98C	hg19	chr19	51293714	51293716	+	In_Frame_Del	DEL	CTG	CTG	-	c.43_45del	p.15_15del	ENST00000252530
P002	FHAD1	hg19	chr1	15655901	15655901	+	Silent	SNP	G	G	A	c.G1770A	p.Q590Q	ENST00000417793
P002	HSPG2	hg19	chr1	22200971	22200971	+	Missense_Mutation	SNP	T	T	G	c.A3584C	p.Y1195S	ENST00000374695
P002	PRCC	hg19	chr1	156737773	156737773	+	Silent	SNP	A	A	C	c.A210C	p.P70P	ENST00000353233
P002	NVL	hg19	chr1	224420922	224420922	+	Silent	SNP	C	C	T	c.G2436A	p.Q812Q	ENST00000281701
P002	FAM171B	hg19	chr2	187558960	187558960	+	Silent	SNP	G	G	A	c.G60A	p.L20L	ENST00000304698
P002	IQSEC1	hg19	chr3	13008935	13008935	+	Missense_Mutation	SNP	C	C	T	c.G17A	p.C6Y	ENST00000273221
P002	MED12L	hg19	chr3	151112625	151112625	+	Silent	SNP	C	C	A	c.C5685A	p.L1895L	ENST00000474524
P002	KIAA0226	hg19	chr3	197408228	197408228	+	Missense_Mutation	SNP	C	C	A	c.G2277T	p.K759N	ENST00000389665
P002	MUC4	hg19	chr3	195516858	195516858	+	Silent	SNP	C	C	T	c.G1593A	p.R531R	ENST00000480843
P002	MUC4	hg19	chr3	195513519	195513519	+	Silent	SNP	A	A	T	c.T4932A	p.G1644G	ENST00000480843
P002	MUC4	hg19	chr3	195505836	195505836	+	Missense_Mutation	SNP	G	G	C	c.C12615G	p.H4205Q	ENST00000480843
P002	MUC4	hg19	chr3	195512665	195512665	+	Missense_Mutation	SNP	G	G	A	c.C5786T	p.A1929V	ENST00000480843
P002	MUC4	hg19	chr3	195506007	195506007	+	Silent	SNP	G	G	A	c.C12444T	p.T4148T	ENST00000480843
P002	MUC4	hg19	chr3	195513515	195513515	+	Missense_Mutation	SNP	C	C	T	c.G4936A	p.A1646T	ENST00000480843
P002	MUC4	hg19	chr3	195512460	195512460	+	Silent	SNP	A	A	G	c.T5991C	p.H1997H	ENST00000480843
P002	MUC4	hg19	chr3	195505814	195505814	+	Missense_Mutation	SNP	C	C	T	c.G12637A	p.D4213N	ENST00000480843
P002	MUC4	hg19	chr3	195511268	195511268	+	Missense_Mutation	SNP	T	T	A	c.A7183T	p.T2395S	ENST00000480843
P002	MUC4	hg19	chr3	195509817	195509817	+	Silent	SNP	G	G	A	c.C8634T	p.A2878A	ENST00000480843
P002	MUC4	hg19	chr3	195510889	195510889	+	Missense_Mutation	SNP	G	G	A	c.C7562T	p.A2521V	ENST00000480843
P002	MUC4	hg19	chr3	195511259	195511259	+	Missense_Mutation	SNP	T	T	C	c.A7192G	p.T2398A	ENST00000480843
P002	MUC4	hg19	chr3	195511849	195511849	+	Missense_Mutation	SNP	G	G	A	c.C6602T	p.A2201V	ENST00000480843
P002	MUC4	hg19	chr3	195511859	195511859	+	Missense_Mutation	SNP	T	T	C	c.A6592G	p.T2198A	ENST00000480843
P002	MUC4	hg19	chr3	195512445	195512445	+	Silent	SNP	C	C	A	c.G6006T	p.P2002P	ENST00000480843
P002	MUC4	hg19	chr3	195508336	195508336	+	Missense_Mutation	SNP	C	C	T	c.G10115A	p.G3372D	ENST00000480843
P002	MUC4	hg19	chr3	195515065	195515065	+	Missense_Mutation	SNP	G	G	A	c.C3386T	p.A1129V	ENST00000480843
P002	MUC4	hg19	chr3	195511204	195511204	+	Missense_Mutation	SNP	T	T	G	c.A7247C	p.H2416P	ENST00000480843
P002	MUC4	hg19	chr3	195508343	195508343	+	Missense_Mutation	SNP	A	A	T	c.T10108A	p.S3370T	ENST00000480843
P002	MUC4	hg19	chr3	195510896	195510896	+	Missense_Mutation	SNP	G	G	A	c.C7555T	p.P2519S	ENST00000480843
P002	MUC4	hg19	chr3	195515093	195515093	+	Missense_Mutation	SNP	G	G	A	c.C3358T	p.P1120S	ENST00000480843
P002	MUC4	hg19	chr3	195509886	195509886	+	Silent	SNP	G	G	C	c.C8565G	p.S2855S	ENST00000480843
P002	MUC4	hg19	chr3	195515099	195515099	+	Missense_Mutation	SNP	T	T	C	c.A3352G	p.T1118A	ENST00000480843
P002	MUC4	hg19	chr3	195512549	195512549	+	Missense_Mutation	SNP	A	A	G	c.T5902C	p.S1968P	ENST00000480843
P002	MUC4	hg19	chr3	195513493	195513493	+	Missense_Mutation	SNP	C	C	A	c.G4958T	p.S1653I	ENST00000480843
P002	MUC4	hg19	chr3	195509784	195509784	+	Silent	SNP	C	C	T	c.G8667A	p.V2889V	ENST00000480843
P002	MUC4	hg19	chr3	195509795	195509795	+	Missense_Mutation	SNP	C	C	T	c.G8656A	p.A2886T	ENST00000480843
P002	MUC4	hg19	chr3	195506485	195506485	+	Missense_Mutation	SNP	T	T	C	c.A11966G	p.D3989G	ENST00000480843
P002	MUC4	hg19	chr3	195511262	195511262	+	Missense_Mutation	SNP	C	C	G	c.G7189C	p.D2397H	ENST00000480843
P002	RNF44	hg19	chr5	175959452	175959452	+	Missense_Mutation	SNP	C	C	T	c.G22A	p.V8M	ENST00000513029
P002	SCML4	hg19	chr6	108066160	108066160	+	Missense_Mutation	SNP	C	C	A	c.G588T	p.M196I	ENST00000440927
P002	SKIDA1	hg19	chr7	139094365	139094366	+	Frame_Shift_Del	DEL	AG	AG	-	c.942_943del	p.E314fs	ENST00000449193
P002	DIAPH2	hg19	chrX	96136579	96136579	+	Missense_Mutation	SNP	G	G	T	c.G449T	p.G150V	ENST00000373061
P002	FRMPD3	hg19	chrX	106846436	106846436	+	Nonsense_Mutation	SNP	C	C	T	c.C5266T	p.Q1756X	ENST00000276185
P002	FRMPD3	hg19	chrX	106846439	106846439	+	Missense_Mutation	SNP	C	C	G	c.C5269G	p.Q1757E	ENST00000276185
P002	DOCK11	hg19	chrX	117733150	117733150	+	Missense_Mutation	SNP	G	G	C	c.G2521C	p.G841R	ENST00000276204
P002	DOCK11	hg19	chrX	117733151	117733151	+	Missense_Mutation	SNP	G	G	T	c.G2522T	p.G841V	ENST00000276204
P002	RBMX	hg19	chrX	135961560	135961560	+	Missense_Mutation	SNP	C	C	G	c.G27C	p.K9N	ENST00000568578
P002	RBMX	hg19	chrX	135958730	135958730	+	Missense_Mutation	SNP	C	C	A	c.G473T	p.G158V	ENST00000562646
P002	RBMX	hg19	chrX	135958704	135958704	+	Missense_Mutation	SNP	G	G	C	c.C499G	p.P167A	ENST00000562646
P002	CRB2	hg19	chr9	126135741	126135741	+	Silent	SNP	G	G	A	c.G2931A	p.L977L	ENST00000373631
P002	SEC16A	hg19	chr9	139342941	139342941	+	Intron	SNP	T	T	G	c.A91C	p.T31P	ENST00000398335
P002	POLR3A	hg19	chr10	79770291	79770291	+	Missense_Mutation	SNP	G	G	A	c.C1580T	p.A527V	ENST00000372371
P002	CNNM2	hg19	chr10	104679430	104679430	+	Missense_Mutation	SNP	A	A	G	c.A1193G	p.D398G	ENST00000433628
P002	INTS4	hg19	chr11	77614592	77614592	+	Silent	SNP	C	C	T	c.G2091A	p.A697A	ENST00000534064
P002	DUSP15	hg19	chr20	30449315	30449315	+	Missense_Mutation	SNP	A	A	G	c.T290C	p.L97P	ENST00000398084
P002	AMN1	hg19	chr12	31850787	31850787	+	Missense_Mutation	SNP	G	G	C	c.C367G	p.Q123E	ENST00000537562
P002	PABPC3	hg19	chr13	25672211	25672211	+	Silent	SNP	T	T	C	c.T1875C	p.A625A	ENST00000281589
P002	PABPC3	hg19	chr13	25672214	25672214	+	Silent	SNP	C	C	T	c.C1878T	p.T626T	ENST00000281589
P002	CD3EAP	hg19	chr1	214557049	214557051	+	In_Frame_Del	DEL	CCT	CCT	-	c.2147_2149del	p.716_717del	ENST00000589804
P002	GRID2	hg19	chr4	94690579	94690579	+	Missense_Mutation	SNP	G	G	A	c.G2579A	p.G860D	ENST00000282020
P002	ZNF256	hg19	chr19	58458828	58458828	+	Silent	SNP	C	C	T	c.G15A	p.E5E	ENST00000598928
P002	PAN3	hg19	chr13	28712819	28712819	+	Missense_Mutation	SNP	C	C	T	c.C25T	p.P9S	ENST00000380958
P002	DSPP	hg19	chr4	88537306	88537306	+	Silent	SNP	T	T	C	c.T3492C	p.D1164D	ENST00000399271
P002	DSPP	hg19	chr4	88537054	88537054	+	Silent	SNP	T	T	C	c.T3240C	p.D1080D	ENST00000399271
P002	DSPP	hg19	chr4	88537036	88537036	+	Silent	SNP	C	C	T	c.C3222T	p.D1074D	ENST00000399271
P002	DSPP	hg19	chr4	88536880	88536880	+	Silent	SNP	C	C	T	c.C3066T	p.S1022S	ENST00000399271
P002	DSPP	hg19	chr4	88535804	88535804	+	Missense_Mutation	SNP	A	A	G	c.A1990G	p.N664D	ENST00000399271
P002	DSPP	hg19	chr4	88536874	88536874	+	Silent	SNP	C	C	T	c.C3060T	p.D1020D	ENST00000399271
P002	DSPP	hg19	chr4	88537045	88537045	+	Silent	SNP	C	C	T	c.C3231T	p.D1077D	ENST00000399271
P002	DSPP	hg19	chr4	88537060	88537060	+	Silent	SNP	T	T	C	c.T3246C	p.S1082S	ENST00000399271
P002	SEMA3D	hg19	chr7	84651729	84651729	+	Nonsense_Mutation	SNP	G	G	C	c.C1392G	p.Y464X	ENST00000284136
P002	C16orf74	hg19	chr16	85743771	85743771	+	Silent	SNP	T	T	C	c.A30G	p.T10T	ENST00000602766
P002	CEP112	hg19	chr17	63898271	63898271	+	Missense_Mutation	SNP	T	T	A	c.A2162T	p.Q721L	ENST00000535342
P002	GPR78	hg19	chr4	8582921	8582921	+	Missense_Mutation	SNP	G	G	T	c.G212T	p.R71L	ENST00000514302
P002	GPR78	hg19	chr4	8583002	8583002	+	Missense_Mutation	SNP	C	C	T	c.C293T	p.A98V	ENST00000514302
P002	TTN	hg19	chr2	179641608	179641608	+	Missense_Mutation	SNP	G	G	C	c.C4983G	p.I1661M	ENST00000591111
P002	LRCH1	hg19	chr14	74205926	74205928	+	In_Frame_Del	DEL	CTG	CTG	-	c.784_786del	p.262_262del	ENST00000389798
P002	FAM120C	hg19	chr10	79397345	79397347	+	In_Frame_Del	DEL	CCG	CCG	-	c.54_56del	p.18_19del	ENST00000477084
P002	DPY19L4	hg19	chr8	95793318	95793318	+	Missense_Mutation	SNP	C	C	T	c.C1639T	p.P547S	ENST00000414645
P002	PPEF2	hg19	chr4	76781834	76781834	+	Missense_Mutation	SNP	G	G	T	c.C2248A	p.P750T	ENST00000286719
P002	ADAMTSL3	hg19	chr15	84442350	84442350	+	Silent	SNP	C	C	A	c.C265A	p.R89R	ENST00000567476
P002	SORCS3	hg19	chr10	106401389	106401389	+	Nonsense_Mutation	SNP	C	C	T	c.C304T	p.Q102X	ENST00000369701
P002	TYSND1	hg19	chr10	71906292	71906292	+	Silent	SNP	G	G	A	c.C51T	p.C17C	ENST00000335494
P002	TRIM67	hg19	chrX	136648985	136648987	+	In_Frame_Del	DEL	CGC	CGC	-	c.135_137del	p.45_46del	ENST00000444294
P002	AASDH	hg19	chr4	57215588	57215588	+	Missense_Mutation	SNP	T	T	G	c.A2329C	p.T777P	ENST00000502617
P002	ACAN	hg19	chr15	89398671	89398671	+	Missense_Mutation	SNP	G	G	A	c.G2855A	p.G952E	ENST00000559004
P002	FAM86C1	hg19	chr11	71507261	71507261	+	RNA	SNP	A	A	G	c.A358G	p.T120A	ENST00000528685
P002	FAM86C1	hg19	chr11	71507263	71507263	+	RNA	SNP	A	A	G	c.A360G	p.T120T	ENST00000528685
P002	CBS	hg19	chr21	44482453	44482453	+	Missense_Mutation	SNP	C	C	T	c.G1007A	p.R336H	ENST00000398168
P002	YDJC	hg19	chr22	21983382	21983382	+	Silent	SNP	C	C	T	c.G519A	p.L173L	ENST00000292778
P002	FGF19	hg19	chr11	69518601	69518601	+	Missense_Mutation	SNP	C	C	T	c.G44A	p.G15D	ENST00000294312
P002	BEND5	hg19	chr1	49201926	49201926	+	Missense_Mutation	SNP	G	G	T	c.C1093A	p.L365I	ENST00000371833
P002	USP24	hg19	chr1	55680544	55680544	+	Silent	SNP	G	G	A	c.C243T	p.G81G	ENST00000294383
P002	KNCN	hg19	chr1	47013418	47013418	+	Missense_Mutation	SNP	C	C	T	c.G359A	p.G120E	ENST00000481882
P002	MEGF6	hg19	chr1	3519127	3519127	+	Missense_Mutation	SNP	C	C	G	c.G169C	p.G57R	ENST00000485002
P002	SNED1	hg19	chr2	242011122	242011122	+	Missense_Mutation	SNP	A	A	C	c.A3721C	p.T1241P	ENST00000405547
P002	TEKT4	hg19	chr2	95541470	95541470	+	Silent	SNP	T	T	C	c.T1074C	p.R358R	ENST00000295201
P002	TEKT4	hg19	chr2	95541473	95541473	+	Silent	SNP	C	C	T	c.C1077T	p.D359D	ENST00000295201
P002	TEKT4	hg19	chr2	95541381	95541381	+	Missense_Mutation	SNP	C	C	G	c.C985G	p.Q329E	ENST00000295201
P002	TEKT4	hg19	chr2	95541398	95541398	+	Silent	SNP	A	A	G	c.A1002G	p.K334K	ENST00000295201
P002	RNF149	hg19	chr2	101924922	101924922	+	Missense_Mutation	SNP	G	G	T	c.C129A	p.N43K	ENST00000424632
P002	IGFN1	hg19	chr1	201180438	201180438	+	Silent	SNP	G	G	A	c.G6417A	p.E2139E	ENST00000335211
P002	LMOD1	hg19	chr1	201868841	201868841	+	Missense_Mutation	SNP	C	C	G	c.G1300C	p.E434Q	ENST00000367288
P002	NKX6-1	hg19	chr4	85419381	85419381	+	Missense_Mutation	SNP	T	T	A	c.A1T	p.M1L	ENST00000295886
P002	NKX6-1	hg19	chr4	85419013	85419013	+	Silent	SNP	G	G	A	c.C369T	p.S123S	ENST00000295886
P002	SLMAP	hg19	chr3	57894840	57894840	+	Missense_Mutation	SNP	A	A	T	c.A1611T	p.Q537H	ENST00000428312
P002	SHISA5	hg19	chr3	48541496	48541496	+	Missense_Mutation	SNP	A	A	C	c.T32G	p.L11R	ENST00000443308
P002	MDFI	hg19	chr6	159655079	159655081	+	In_Frame_Del	DEL	GAC	GAC	-	c.3535_3537del	p.1179_1179del	ENST00000419164
P002	GEM	hg19	chr8	95262620	95262620	+	Missense_Mutation	SNP	C	C	A	c.G809T	p.W270L	ENST00000396194
P002	SYK	hg19	chr9	93607851	93607851	+	Missense_Mutation	SNP	G	G	A	c.G553A	p.G185R	ENST00000375754
P002	RASEF	hg19	chr9	85677680	85677680	+	Missense_Mutation	SNP	C	C	T	c.G103A	p.A35T	ENST00000376447
P002	AQP7	hg19	chr9	33395103	33395103	+	Silent	SNP	G	G	A	c.C117T	p.A39A	ENST00000539936
P002	SLITRK5	hg19	chr13	88325753	88325753	+	Intron	SNP	A	A	G	c.A19G	p.R7G	ENST00000400028
P002	FAT3	hg19	chr11	92088198	92088198	+	Missense_Mutation	SNP	T	T	A	c.T2920A	p.S974T	ENST00000541502
P002	TAF3	hg19	chr10	7860732	7860732	+	Silent	SNP	G	G	T	c.G60T	p.A20A	ENST00000344293
P002	KCNC2	hg19	chr12	75601387	75601387	+	Missense_Mutation	SNP	G	G	A	c.C377T	p.P126L	ENST00000549446
P002	PLD4	hg19	chr14	105395155	105395155	+	Silent	SNP	G	G	T	c.G348T	p.L116L	ENST00000557573
P002	CHRFAM7A	hg19	chr15	30659646	30659646	+	Missense_Mutation	SNP	G	G	T	c.C422A	p.P141H	ENST00000401522
P002	DCTN5	hg19	chr16	23669946	23669946	+	Missense_Mutation	SNP	G	G	T	c.G236T	p.G79V	ENST00000568589
P002	IRGQ	hg19	chr19	44096456	44096456	+	Missense_Mutation	SNP	G	G	A	c.C1594T	p.R532C	ENST00000422989
P002	SRRM2	hg19	chr16	2814271	2814271	+	Missense_Mutation	SNP	C	C	A	c.C3742A	p.P1248T	ENST00000301740
P002	RPSA	hg19	chr3	39453515	39453515	+	Silent	SNP	A	A	G	c.A756G	p.V252V	ENST00000458478
P002	NUDT16L1	hg19	chr16	4744505	4744505	+	Intron	SNP	T	T	G	c.T680G	p.V227G	ENST00000405142
P002	MAT2A	hg19	chr2	85768207	85768207	+	Missense_Mutation	SNP	T	T	A	c.T93A	p.D31E	ENST00000306434
P002	XPO6	hg19	chr16	28112831	28112831	+	Missense_Mutation	SNP	C	C	G	c.G3182C	p.G1061A	ENST00000565698
P002	GCSAML	hg19	chr1	247712507	247712507	+	Missense_Mutation	SNP	T	T	A	c.T14A	p.L5H	ENST00000366491
P002	OR4K14	hg19	chr14	20483021	20483021	+	Missense_Mutation	SNP	G	G	T	c.C332A	p.A111D	ENST00000305045
P002	OR4K14	hg19	chr14	20483022	20483022	+	Missense_Mutation	SNP	C	C	G	c.G331C	p.A111P	ENST00000305045
P002	INO80E	hg19	chr16	30016640	30016640	+	Silent	SNP	A	A	C	c.A561C	p.P187P	ENST00000567705
P002	PFKFB3	hg19	chr10	6268278	6268278	+	Missense_Mutation	SNP	G	G	A	c.G1507A	p.A503T	ENST00000540253
P002	SERPINB9	hg19	chr6	2890517	2890517	+	Silent	SNP	T	T	A	c.A1011T	p.V337V	ENST00000380698
P002	CEL	hg19	chr9	135946999	135946999	+	Missense_Mutation	SNP	A	A	C	c.A2119C	p.T707P	ENST00000372080
P002	OBP2B	hg19	chr9	136083528	136083528	+	Missense_Mutation	SNP	T	T	A	c.A269T	p.Y90F	ENST00000473737
P002	FAM98B	hg19	chr15	38776662	38776662	+	Silent	SNP	T	T	G	c.T1104G	p.G368G	ENST00000397609
P002	FAM98B	hg19	chr15	38776684	38776684	+	Missense_Mutation	SNP	T	T	G	c.T1126G	p.W376G	ENST00000397609
P002	MCC	hg19	chr5	112824069	112824069	+	Missense_Mutation	SNP	T	T	C	c.A43G	p.S15G	ENST00000408903
P002	PTGER4	hg19	chr5	40692177	40692177	+	Silent	SNP	C	C	T	c.C1164T	p.I388I	ENST00000302472
P002	ANKRD20A4	hg19	chr9	69382227	69382227	+	Silent	SNP	C	C	T	c.C135T	p.D45D	ENST00000357336
P002	CLEC7A	hg19	chr12	10282624	10282624	+	Missense_Mutation	SNP	A	A	T	c.T58A	p.F20I	ENST00000529761
P002	POP7	hg19	chr7	100304816	100304816	+	Silent	SNP	G	G	A	c.G363A	p.L121L	ENST00000457480
P002	AGAP5	hg19	chr10	75435368	75435368	+	Silent	SNP	C	C	T	c.G1050A	p.S350S	ENST00000374094
P002	CORO1B	hg19	chr11	67209178	67209178	+	Intron	SNP	A	A	G	c.T480C	p.A160A	ENST00000545016
P002	RAPH1	hg19	chr2	204305627	204305627	+	Silent	SNP	T	T	G	c.A2442C	p.T814T	ENST00000374493
P002	RP11-683L23.1	hg19	chr18	48125	48125	+	IGR	SNP	G	G	A	c.C600T	p.F200F	ENST00000308911
P002	RP11-683L23.1	hg19	chr18	47631	47631	+	IGR	SNP	G	G	C	c.C1094G	p.A365G	ENST00000308911
P002	RP11-683L23.1	hg19	chr18	48028	48028	+	IGR	SNP	T	T	C	c.A697G	p.M233V	ENST00000308911
P002	EHBP1L1	hg19	chr11	65352621	65352621	+	Silent	SNP	C	C	T	c.C1743T	p.S581S	ENST00000533237
P002	PPP1R14B	hg19	chr11	64012766	64012766	+	Intron	SNP	T	T	G	c.A27C	p.P9P	ENST00000542235
P002	JUND	hg19	chr21	46951916	46951918	+	In_Frame_Del	DEL	CAG	CAG	-	c.334_336del	p.112_112del	ENST00000252818
P002	SLC19A1	hg19	chr21	46918387	46918387	+	Intron	SNP	G	G	T	c.C1433A	p.A478E	ENST00000567670
P002	SLC19A1	hg19	chr21	46918269	46918269	+	Intron	SNP	T	T	C	c.A1551G	p.G517G	ENST00000567670
P002	GIGYF2	hg19	chr11	66512291	66512293	+	In_Frame_Del	DEL	GGC	GGC	-	c.78_80del	p.26_27del	ENST00000409547
P002	CD7	hg19	chr17	80275348	80275348	+	Silent	SNP	C	C	T	c.G24A	p.L8L	ENST00000584284
P002	FAM53A	hg19	chr4	1657285	1657285	+	Missense_Mutation	SNP	C	C	T	c.G302A	p.S101N	ENST00000489363
P002	GOLGA6L2	hg19	chr15	23689063	23689063	+	Missense_Mutation	SNP	G	G	A	c.C452T	p.P151L	ENST00000567107
P002	GOLGA6L2	hg19	chr15	23686043	23686043	+	Missense_Mutation	SNP	A	A	G	c.T1579C	p.W527R	ENST00000567107
P002	GOLGA6L2	hg19	chr15	23685185	23685185	+	Missense_Mutation	SNP	C	C	A	c.G2437T	p.A813S	ENST00000567107
P002	GOLGA6L2	hg19	chr15	23685080	23685080	+	Missense_Mutation	SNP	G	G	C	c.C2542G	p.P848A	ENST00000567107
P002	GOLGA6L2	hg19	chr15	23686185	23686185	+	Missense_Mutation	SNP	A	A	C	c.T1437G	p.N479K	ENST00000567107
P002	GOLGA6L2	hg19	chr15	23686143	23686143	+	Silent	SNP	C	C	T	c.G1479A	p.L493L	ENST00000567107
P002	GOLGA6L2	hg19	chr15	23685178	23685178	+	Missense_Mutation	SNP	C	C	G	c.G2444C	p.G815A	ENST00000567107
P002	ANKRD36C	hg19	chr2	96549947	96549947	+	IGR	SNP	A	A	T	c.T3239A	p.I1080K	ENST00000456556
P002	ANKRD36C	hg19	chr2	96549927	96549927	+	IGR	SNP	C	C	T	c.G3259A	p.G1087R	ENST00000456556
P002	ANKRD36C	hg19	chr2	96549973	96549973	+	IGR	SNP	A	A	C	c.T3213G	p.D1071E	ENST00000456556
P002	ANKRD36C	hg19	chr2	96549977	96549977	+	IGR	SNP	T	T	G	c.A3209C	p.K1070T	ENST00000456556
P002	CEP135	hg19	chr4	56819276	56819276	+	Missense_Mutation	SNP	C	C	T	c.C139T	p.L47F	ENST00000422247
P002	NLRP6	hg19	chr11	281416	281416	+	Missense_Mutation	SNP	G	G	A	c.G1682A	p.R561H	ENST00000534750
P002	RSRC1	hg19	chr3	158262014	158262014	+	Missense_Mutation	SNP	A	A	G	c.A955G	p.R319G	ENST00000480820
P002	CTBP2	hg19	chr10	126678190	126678190	+	Missense_Mutation	SNP	G	G	A	c.C1235T	p.P412L	ENST00000531469
P002	CTBP2	hg19	chr10	126678246	126678246	+	Silent	SNP	A	A	G	c.T1179C	p.G393G	ENST00000531469
P002	CTBP2	hg19	chr10	126678251	126678251	+	Missense_Mutation	SNP	C	C	A	c.G1174T	p.V392L	ENST00000531469
P002	CTBP2	hg19	chr10	126678196	126678196	+	Missense_Mutation	SNP	C	C	T	c.G1229A	p.G410D	ENST00000531469
P002	IKZF2	hg19	chr17	56833644	56833646	+	In_Frame_Del	DEL	GAG	GAG	-	c.286_288del	p.96_96del	ENST00000442445
P002	MCTP1	hg19	chr5	94619749	94619749	+	Silent	SNP	G	G	A	c.C531T	p.D177D	ENST00000515393
P002	OR4B1	hg19	chr11	48239273	48239273	+	Silent	SNP	G	G	A	c.G912A	p.E304E	ENST00000309562
P002	MAGEB6	hg19	chrX	26212940	26212940	+	Missense_Mutation	SNP	G	G	A	c.G977A	p.G326E	ENST00000379034
P002	NHLH2	hg19	chr1	116380887	116380887	+	Nonsense_Mutation	SNP	G	G	T	c.C107A	p.S36X	ENST00000320238
P002	PDE4DIP	hg19	chr1	145014279	145014279	+	Intron	SNP	A	A	C	c.T263G	p.L88W	ENST00000493130
P002	NDUFV2	hg19	chr18	9122638	9122638	+	Missense_Mutation	SNP	G	G	C	c.G437C	p.R146P	ENST00000400033
P002	NDUFV2	hg19	chr18	9122591	9122591	+	Silent	SNP	T	T	C	c.T390C	p.V130V	ENST00000400033
P002	NDUFV2	hg19	chr18	9122611	9122611	+	Missense_Mutation	SNP	T	T	C	c.T410C	p.V137A	ENST00000400033
P002	ZFPM1	hg19	chr16	88600854	88600854	+	Nonsense_Mutation	SNP	G	G	T	c.G2488T	p.E830X	ENST00000319555
P002	NRXN1	hg19	chr2	50149095	50149095	+	Missense_Mutation	SNP	T	T	A	c.A4631T	p.E1544V	ENST00000404971
P002	GOLGA8J	hg19	chr15	30381959	30381959	+	Missense_Mutation	SNP	C	C	G	c.C931G	p.L311V	ENST00000567927
P002	TPRXL	hg19	chr3	14106301	14106301	+	RNA	SNP	A	A	G	c.A625G	p.S209G	ENST00000429201
P002	TPRXL	hg19	chr3	14106302	14106302	+	RNA	SNP	G	G	C	c.G626C	p.S209T	ENST00000429201
P002	TPRXL	hg19	chr3	14106367	14106367	+	RNA	SNP	T	T	A	c.T691A	p.C231S	ENST00000429201
P002	HMHA1	hg19	chr19	1067628	1067628	+	Intron	SNP	G	G	A	c.G57A	p.R19R	ENST00000586866
P002	ELMSAN1	hg19	chr10	21806054	21806056	+	In_Frame_Del	DEL	GCG	GCG	-	c.696_698del	p.232_233del	ENST00000435371
P002	HOXC10	hg19	chr12	54379364	54379364	+	Silent	SNP	G	G	A	c.G321A	p.E107E	ENST00000303460
P002	MUC16	hg19	chr19	9028242	9028242	+	Missense_Mutation	SNP	T	T	C	c.A36550G	p.N12184D	ENST00000397910
P002	MUC16	hg19	chr19	8997508	8997508	+	Silent	SNP	A	A	G	c.T40914C	p.T13638T	ENST00000397910
P002	MUC16	hg19	chr19	9028245	9028245	+	Silent	SNP	G	G	T	c.C36547A	p.R12183R	ENST00000397910
P002	MUC16	hg19	chr19	9028253	9028253	+	Missense_Mutation	SNP	G	G	C	c.C36539G	p.T12180S	ENST00000397910
P002	NCOA3	hg19	chr6	43970504	43970506	+	In_Frame_Del	DEL	GCG	GCG	-	c.370_372del	p.124_124del	ENST00000372004
P002	BAI1	hg19	chr8	143556967	143556967	+	Missense_Mutation	SNP	G	G	A	c.G917A	p.G306D	ENST00000521208
P002	HHIPL1	hg19	chr14	100141515	100141515	+	Missense_Mutation	SNP	C	C	T	c.C1901T	p.P634L	ENST00000330710
P002	ZNF804B	hg19	chr7	88966259	88966259	+	Missense_Mutation	SNP	A	A	T	c.A3963T	p.Q1321H	ENST00000333190
P002	PLCXD3	hg19	chr5	41313736	41313736	+	Missense_Mutation	SNP	C	C	T	c.G949A	p.G317R	ENST00000377801
P002	CNPY3	hg19	chrX	47030561	47030563	+	In_Frame_Del	DEL	GGA	GGA	-	c.336_338del	p.112_113del	ENST00000394142
P002	NEB	hg19	chr2	152551077	152551077	+	Missense_Mutation	SNP	G	G	A	c.C1741T	p.P581S	ENST00000427231
P002	CALN1	hg19	chr7	71488647	71488647	+	Missense_Mutation	SNP	A	A	C	c.T370G	p.W124G	ENST00000395276
P002	MEX3B	hg19	chr15	82337766	82337766	+	Intron	SNP	A	A	C	c.T281G	p.V94G	ENST00000558133
P002	GOLGA8G	hg19	chr15	28776159	28776159	+	RNA	SNP	C	C	T	c.G200A	p.G67E	ENST00000525590
P002	RP1L1	hg19	chr8	10468520	10468520	+	Missense_Mutation	SNP	C	C	T	c.G3088A	p.G1030R	ENST00000382483
P002	C6orf223	hg19	chr8	37555934	37555936	+	In_Frame_Del	DEL	CGC	CGC	-	c.1515_1517del	p.505_506del	ENST00000336600
P002	LZTR1	hg19	chrX	54209519	54209521	+	In_Frame_Del	DEL	TGC	TGC	-	c.111_113del	p.37_38del	ENST00000215739
P002	GOLGA6L4	hg19	chr15	84909434	84909434	+	Missense_Mutation	SNP	G	G	A	c.G1328A	p.R443Q	ENST00000510439
P002	PRKD1	hg19	chr14	30396529	30396529	+	Silent	SNP	G	G	A	c.C190T	p.L64L	ENST00000415220
P002	BCL11B	hg19	chr6	99282950	99282952	+	In_Frame_Del	DEL	CGG	CGG	-	c.201_203del	p.67_68del	ENST00000357195
P002	FOXD4L1	hg19	chr2	114257369	114257369	+	Missense_Mutation	SNP	C	C	A	c.C536A	p.T179N	ENST00000306507
P002	JAG2	hg19	chr14	105617992	105617992	+	Nonsense_Mutation	SNP	G	G	T	c.C1124A	p.S375X	ENST00000347004
P002	MUC6	hg19	chr11	1017426	1017426	+	Missense_Mutation	SNP	C	C	T	c.G5375A	p.R1792K	ENST00000421673
P002	F8	hg19	chrX	154156968	154156968	+	Nonsense_Mutation	SNP	A	A	C	c.T5097G	p.Y1699X	ENST00000360256
P002	PRSS57	hg19	chr19	695420	695420	+	Missense_Mutation	SNP	C	C	G	c.G11C	p.G4A	ENST00000329267
P002	MAGEA11	hg19	chrX	148794915	148794915	+	Silent	SNP	G	G	A	c.G96A	p.Q32Q	ENST00000355220
P002	FAM47A	hg19	chrX	34150129	34150129	+	Missense_Mutation	SNP	G	G	T	c.C267A	p.D89E	ENST00000346193
P002	FAM131C	hg19	chr1	16388612	16388612	+	Missense_Mutation	SNP	C	C	A	c.G250T	p.A84S	ENST00000375662
P002	FAM131C	hg19	chr1	16388613	16388613	+	Silent	SNP	C	C	A	c.G249T	p.L83L	ENST00000375662
P002	CALHM1	hg19	chr10	105215057	105215057	+	Missense_Mutation	SNP	G	G	T	c.C1003A	p.P335T	ENST00000329905
P002	CALHM1	hg19	chr10	105215056	105215056	+	Missense_Mutation	SNP	G	G	T	c.C1004A	p.P335Q	ENST00000329905
P002	KRTAP5-5	hg19	chr11	1651613	1651613	+	Silent	SNP	T	T	C	c.T543C	p.P181P	ENST00000399676
P002	KRTAP5-5	hg19	chr11	1651645	1651645	+	Missense_Mutation	SNP	A	A	G	c.A575G	p.Y192C	ENST00000399676
P002	KRTAP5-5	hg19	chr11	1651615	1651615	+	Missense_Mutation	SNP	A	A	G	c.A545G	p.Y182C	ENST00000399676
P002	IRS2	hg19	chr13	110435612	110435612	+	Missense_Mutation	SNP	C	C	T	c.G2789A	p.R930H	ENST00000375856
P002	GPAT2	hg19	chr2	96690039	96690039	+	Silent	SNP	C	C	T	c.G1716A	p.G572G	ENST00000434632
P002	NF2	hg19	chr22	29999995	29999995	+	Missense_Mutation	SNP	G	G	A	c.G8A	p.G3E	ENST00000432151
P002	LILRB4	hg19	chr19	55177874	55177874	+	Silent	SNP	G	G	A	c.G975A	p.Q325Q	ENST00000391736
P002	ZNF395	hg19	chr8	28207599	28207599	+	Silent	SNP	G	G	A	c.C1308T	p.A436A	ENST00000523202
P002	C11orf96	hg19	chr11	43964513	43964513	+	Missense_Mutation	SNP	C	C	T	c.C998T	p.P333L	ENST00000339446
P002	SBK2	hg19	chr19	56041339	56041339	+	Missense_Mutation	SNP	C	C	T	c.G808A	p.A270T	ENST00000413299
P002	BMP2	hg19	chr19	13988559	13988561	+	In_Frame_Del	DEL	GAG	GAG	-	c.440_442del	p.147_148del	ENST00000378827
P002	HNF1B	hg19	chr17	16335490	16335492	+	In_Frame_Del	DEL	TGC	TGC	-	c.1865_1867del	p.622_623del	ENST00000561193
P002	OR52B6	hg19	chr11	5602549	5602549	+	Missense_Mutation	SNP	C	C	T	c.C443T	p.P148L	ENST00000345043
P002	DNAH17	hg19	chr17	76567425	76567425	+	Silent	SNP	G	G	T	c.C768A	p.I256I	ENST00000585328
P002	SHISA7	hg19	chr19	55944727	55944727	+	Silent	SNP	C	C	T	c.G1413A	p.P471P	ENST00000376325
P002	MORN2	hg19	chr2	39109612	39109612	+	Missense_Mutation	SNP	C	C	A	c.C196A	p.H66N	ENST00000410014
P002	ZNF676	hg19	chr19	22363693	22363693	+	Missense_Mutation	SNP	C	C	T	c.G826A	p.A276T	ENST00000397121
P002	ZNF676	hg19	chr19	22363689	22363689	+	Missense_Mutation	SNP	T	T	C	c.A830G	p.E277G	ENST00000397121
P002	TRRAP	hg19	chr7	98524914	98524914	+	Silent	SNP	C	C	T	c.C3100T	p.L1034L	ENST00000359863
P002	NACA	hg19	chr12	57112317	57112317	+	Intron	SNP	A	A	G	c.T2997C	p.G999G	ENST00000454682
P002	RABL6	hg19	chr9	139720253	139720253	+	Silent	SNP	T	T	C	c.T288C	p.V96V	ENST00000484471
P002	MAML3	hg19	chr4	140811099	140811099	+	Silent	SNP	C	C	T	c.G1491A	p.Q497Q	ENST00000509479
P002	TOMM20L	hg19	chr14	58862689	58862689	+	Missense_Mutation	SNP	G	G	A	c.G14A	p.R5H	ENST00000557754
P002	SERPINA1	hg19	chr14	94845795	94845795	+	Intron	SNP	T	T	C	c.A1071G	p.R357R	ENST00000402629
P002	GOLGA6L1	hg19	chr15	22741237	22741237	+	Silent	SNP	C	C	T	c.C462T	p.D154D	ENST00000560659
P002	ZNF460	hg19	chr19	57802144	57802144	+	Missense_Mutation	SNP	C	C	G	c.C112G	p.Q38E	ENST00000599602
P002	HRNR	hg19	chr1	152186443	152186443	+	Silent	SNP	A	A	G	c.T7662C	p.H2554H	ENST00000368801
P002	ZNF335	hg19	chr20	44599912	44599912	+	Silent	SNP	C	C	G	c.G138C	p.P46P	ENST00000322927
P002	C9orf141	hg19	chr9	139863859	139863859	+	IGR	SNP	C	C	T	c.C40T	p.P14S	ENST00000371629
P002	GPATCH3	hg19	chr1	27226738	27226738	+	Missense_Mutation	SNP	G	G	C	c.C196G	p.L66V	ENST00000361720
P002	ZNF469	hg19	chrX	153042691	153042691	+	Frame_Shift_Del	DEL	G	G	-	c.5025delG	p.E1675fs	ENST00000565624
P002	OXCT2	hg19	chr1	40236354	40236354	+	Missense_Mutation	SNP	A	A	C	c.T574G	p.F192V	ENST00000327582
P002	MUC2	hg19	chr11	1092831	1092831	+	Silent	SNP	A	A	G	c.A4650G	p.P1550P	ENST00000441003
P002	MUC2	hg19	chr11	1092884	1092884	+	Missense_Mutation	SNP	C	C	T	c.C4703T	p.T1568M	ENST00000441003
P002	INF2	hg19	chr14	105173867	105173867	+	Silent	SNP	A	A	C	c.A1263C	p.P421P	ENST00000392634
P002	AL359195.1	hg19	chr10	82012644	82012644	+	IGR	SNP	G	G	T	c.G162T	p.W54C	ENST00000356374
P002	RSPH6A	hg19	chr2	233697764	233697766	+	In_Frame_Del	DEL	GCA	GCA	-	c.2727_2729del	p.909_910del	ENST00000221538
P002	CYHR1	hg19	chr10	46999591	46999591	+	In_Frame_Ins	INS	-	-	ATGAGGGAG	c.711_712insATGAGGGAG	p.G237delinsGMRE	ENST00000424149
P002	TAP2	hg19	chr6	32805610	32805610	+	Missense_Mutation	SNP	T	T	C	c.A401G	p.N134S	ENST00000452392
P002	NANOS3	hg19	chr13	108518687	108518689	+	In_Frame_Del	DEL	CTG	CTG	-	c.256_258del	p.86_86del	ENST00000397555
P002	TRIM49C	hg19	chr11	89806419	89806419	+	IGR	SNP	T	T	G	c.T1202G	p.V401G	ENST00000432771
P002	PRAMEF11	hg19	chr1	12885260	12885260	+	Missense_Mutation	SNP	T	T	C	c.A851G	p.K284R	ENST00000535591
P002	AC024580.1	hg19	chr19	56663058	56663058	+	Intron	SNP	C	C	G	c.G193C	p.A65P	ENST00000376271
P002	LILRB3	hg19	chr19	54725094	54725094	+	Intron	SNP	G	G	A	c.C816T	p.P272P	ENST00000391750
P002	LILRB3	hg19	chr19	54724980	54724980	+	Intron	SNP	G	G	A	c.C930T	p.S310S	ENST00000391750
P002	LILRB3	hg19	chr19	54724958	54724958	+	Intron	SNP	C	C	T	c.G952A	p.A318T	ENST00000391750
P002	LILRB3	hg19	chr19	54724970	54724970	+	Intron	SNP	T	T	C	c.A940G	p.N314D	ENST00000391750
P002	LILRB3	hg19	chr19	54724959	54724959	+	Intron	SNP	C	C	G	c.G951C	p.M317I	ENST00000391750
P002	CBY3	hg19	chr5	179106027	179106027	+	Missense_Mutation	SNP	G	G	T	c.C286A	p.R96S	ENST00000376974
P002	FAM27E2	hg19	chr9	45733892	45733892	+	IGR	SNP	A	A	T	c.A305T	p.H102L	ENST00000377529
P002	FAM27E2	hg19	chr9	45733895	45733895	+	IGR	SNP	T	T	C	c.T308C	p.I103T	ENST00000377529
P002	FAM27E2	hg19	chr9	45733775	45733775	+	IGR	SNP	A	A	G	c.A188G	p.H63R	ENST00000377529
P002	FAM27E2	hg19	chr9	45733770	45733770	+	IGR	SNP	A	A	T	c.A183T	p.T61T	ENST00000377529
P002	RP11-830F9.6	hg19	chr16	89017471	89017471	+	Silent	SNP	A	A	G	c.A945G	p.G315G	ENST00000378347
P002	RP11-830F9.6	hg19	chr16	89016968	89016968	+	Nonsense_Mutation	SNP	C	C	T	c.C442T	p.Q148X	ENST00000378347
P002	RP11-830F9.6	hg19	chr16	89017292	89017292	+	Missense_Mutation	SNP	T	T	C	c.T766C	p.S256P	ENST00000378347
P002	MUC12	hg19	chr7	100645478	100645478	+	Silent	SNP	T	T	G	c.T12063G	p.G4021G	ENST00000379442
P002	OR6C3	hg19	chr12	55726183	55726183	+	Missense_Mutation	SNP	G	G	T	c.G699T	p.K233N	ENST00000379667
P002	VCX3B	hg19	chrX	8434101	8434101	+	Missense_Mutation	SNP	G	G	A	c.G418A	p.V140M	ENST00000453306
P002	VCX3B	hg19	chrX	8434158	8434158	+	Missense_Mutation	SNP	G	G	C	c.G475C	p.E159Q	ENST00000453306
P002	GAGE2E	hg19	chrX	49199338	49199338	+	Missense_Mutation	SNP	C	C	T	c.C155T	p.P52L	ENST00000402590
P002	KRTAP5-2	hg19	chr11	1619459	1619459	+	Missense_Mutation	SNP	T	T	C	c.A22G	p.R8G	ENST00000412090
P002	LRRC30	hg19	chr18	7231180	7231180	+	Missense_Mutation	SNP	C	C	T	c.C44T	p.P15L	ENST00000383467
P002	IGKV1D-13	hg19	chr2	90193319	90193319	+	IGR	SNP	A	A	C	c.A246C	p.S82S	ENST00000390275
P002	IGKV1D-13	hg19	chr2	90193233	90193233	+	IGR	SNP	G	G	T	c.G160T	p.A54S	ENST00000390275
P002	IGKV1D-13	hg19	chr2	90193231	90193231	+	IGR	SNP	G	G	A	c.G158A	p.S53N	ENST00000390275
P002	IGKV1D-13	hg19	chr2	90193268	90193268	+	IGR	SNP	T	T	C	c.T195C	p.A65A	ENST00000390275
P002	IGKV1D-13	hg19	chr2	90193328	90193328	+	IGR	SNP	C	C	T	c.C255T	p.S85S	ENST00000390275
P002	IGKV1D-13	hg19	chr2	90193214	90193214	+	IGR	SNP	A	A	G	c.A141G	p.A47A	ENST00000390275
P002	IGKV1D-42	hg19	chr2	90229101	90229101	+	IGR	SNP	C	C	T	c.C37T	p.L13L	ENST00000390278
P002	TRBV10-1	hg19	chr7	142231587	142231587	+	IGR	SNP	G	G	A	c.C330T	p.C110C	ENST00000390364
P002	TRBV10-1	hg19	chr7	142231582	142231582	+	IGR	SNP	C	C	A	c.G335T	p.S112I	ENST00000390364
P002	TRBV10-1	hg19	chr7	142231596	142231596	+	IGR	SNP	T	T	C	c.A321G	p.V107V	ENST00000390364
P002	TRBV10-1	hg19	chr7	142231984	142231984	+	IGR	SNP	C	C	G	c.G39C	p.L13L	ENST00000390364
P002	TRBV10-1	hg19	chr7	142231977	142231977	+	IGR	SNP	C	C	T	c.G46A	p.A16T	ENST00000390364
P002	TRBV10-1	hg19	chr7	142231593	142231593	+	IGR	SNP	A	A	G	c.T324C	p.Y108Y	ENST00000390364
P002	IGHV3-48	hg19	chr14	106993845	106993845	+	IGR	SNP	T	T	G	c.A320C	p.D107A	ENST00000390624
P002	IGHV3-48	hg19	chr14	106993886	106993886	+	IGR	SNP	A	A	G	c.T279C	p.N93N	ENST00000390624
P002	IGHV4-61	hg19	chr14	107095356	107095356	+	IGR	SNP	T	T	C	c.A124G	p.T42A	ENST00000390630
P002	KRTAP4-12	hg19	chr17	39280162	39280162	+	Silent	SNP	A	A	G	c.T213C	p.C71C	ENST00000394014
P002	ADAT3	hg19	chr19	1912778	1912778	+	Silent	SNP	C	C	T	c.C684T	p.C228C	ENST00000602400
P002	GRID2IP	hg19	chr7	6547760	6547760	+	Silent	SNP	T	T	G	c.A2400C	p.P800P	ENST00000457091
P002	GOLGA6B	hg19	chr15	72955008	72955008	+	Missense_Mutation	SNP	G	G	C	c.G1263C	p.E421D	ENST00000421285
P002	OR8U1	hg19	chr15	20740295	20740295	+	Splice_Site	SNP	A	A	T	c.T1455A	p.I485I	ENST00000302270
P002	KRTAP10-4	hg19	chr21	45994110	45994110	+	Missense_Mutation	SNP	A	A	G	c.A475G	p.I159V	ENST00000400374
P002	KRTAP10-4	hg19	chr21	45994302	45994302	+	Missense_Mutation	SNP	T	T	C	c.T667C	p.S223P	ENST00000400374
P002	SIAH3	hg19	chr13	46358010	46358010	+	Silent	SNP	C	C	T	c.G318A	p.L106L	ENST00000400405
P002	GOLGA6L18	hg19	chr15	82934746	82934746	+	RNA	SNP	C	C	T	c.G834A	p.L278L	ENST00000559949
P002	NBPF1	hg19	chr1	16893841	16893841	+	Missense_Mutation	SNP	C	C	T	c.G2672A	p.S891N	ENST00000430580
P002	NBPF1	hg19	chr1	16902931	16902931	+	Missense_Mutation	SNP	C	C	G	c.G1950C	p.Q650H	ENST00000430580
P002	PRR21	hg19	chr2	240982200	240982200	+	Missense_Mutation	SNP	C	C	T	c.G200A	p.C67Y	ENST00000486799
P002	PRRT4	hg19	chr7	127992254	127992254	+	Silent	SNP	G	G	A	c.C1356T	p.C452C	ENST00000446477
P002	ZNF469	hg19	chr16	88497096	88497096	+	Intron	SNP	G	G	A	c.G3218A	p.G1073D	ENST00000565624
P002	CACNA1A	hg19	chr16	88495402	88495402	+	Frame_Shift_Del	DEL	G	G	-	c.1524delG	p.A508fs	ENST00000573710
P002	AC104809.3	hg19	chr2	241874915	241874915	+	IGR	SNP	C	C	T	c.C1761T	p.C587C	ENST00000430980
P002	KBTBD13	hg19	chr15	65369531	65369531	+	Silent	SNP	G	G	T	c.G378T	p.A126A	ENST00000432196
P002	ANKS1A	hg19	chr6	7910871	7910873	+	In_Frame_Del	DEL	CCG	CCG	-	c.137_139del	p.46_47del	ENST00000535627
P002	IGKV1-17	hg19	chr2	89416955	89416955	+	IGR	SNP	G	G	C	c.C229G	p.Q77E	ENST00000490686
P002	KRTAP5-4	hg19	chr11	1643252	1643252	+	Silent	SNP	A	A	G	c.T72C	p.C24C	ENST00000399682
P002	ERVW-1	hg19	chr7	92098456	92098456	+	IGR	SNP	C	C	T	c.G1240A	p.V414I	ENST00000603053
P002	ERVW-1	hg19	chr7	92098451	92098451	+	IGR	SNP	A	A	G	c.T1245C	p.T415T	ENST00000603053
P002	LILRA6	hg19	chr19	54744846	54744846	+	Silent	SNP	G	G	A	c.C816T	p.P272P	ENST00000440558
P002	USP17L22	hg19	chr4	9270328	9270328	+	Nonsense_Mutation	SNP	G	G	A	c.G984A	p.W328X	ENST00000511280
P002	PRB1	hg19	chr12	11506830	11506830	+	Silent	SNP	T	T	C	c.A207G	p.Q69Q	ENST00000546254
P002	PPIAL4A	hg19	chr1	147955256	147955256	+	Missense_Mutation	SNP	A	A	G	c.T89C	p.L30P	ENST00000539781
P002	RP11-467N20.5	hg19	chr15	23406932	23406932	+	Missense_Mutation	SNP	A	A	G	c.T1904C	p.M635T	ENST00000558241
P002	C19orf83	hg19	chr19	46145632	46145632	+	Missense_Mutation	SNP	G	G	C	c.G173C	p.G58A	ENST00000593161
P002	AC016885.1	hg19	chr8	94241890	94241890	+	IGR	SNP	C	C	A	c.C24A	p.A8A	ENST00000598428
P002	AL133373.1	hg19	chr14	92040654	92040654	+	IGR	SNP	C	C	T	c.G303A	p.E101E	ENST00000596306
P002	MUC8	hg19	chr12	133049871	133049871	+	IGR	SNP	A	A	G	c.T410C	p.M137T	ENST00000595994
P003	NIPAL3	hg19	chr1	24779966	24779966	+	Silent	SNP	C	C	T	c.C363T	p.V121V	ENST00000003912
P003	SEMA3F	hg19	chr3	50222041	50222041	+	Missense_Mutation	SNP	T	T	C	c.T1250C	p.F417S	ENST00000002829
P003	SEMA3F	hg19	chr3	50220122	50220122	+	Missense_Mutation	SNP	G	G	A	c.G809A	p.R270H	ENST00000002829
P003	AOC1	hg19	chr7	150553915	150553915	+	Silent	SNP	G	G	T	c.G357T	p.L119L	ENST00000493429
P003	HECW1	hg19	chr7	43594218	43594218	+	Missense_Mutation	SNP	G	G	A	c.G4538A	p.R1513H	ENST00000395891
P003	MAD1L1	hg19	chr7	2258968	2258968	+	Missense_Mutation	SNP	T	T	C	c.A595G	p.K199E	ENST00000406869
P003	SNX11	hg19	chr17	46190123	46190123	+	Intron	SNP	G	G	T	c.G140T	p.C47F	ENST00000583320
P003	SNX11	hg19	chr17	46190153	46190153	+	Intron	SNP	T	T	C	c.T170C	p.V57A	ENST00000583320
P003	SNX11	hg19	chr17	46190131	46190131	+	Intron	SNP	T	T	C	c.T148C	p.C50R	ENST00000583320
P003	SLC7A2	hg19	chr8	17417865	17417865	+	Missense_Mutation	SNP	C	C	A	c.C1444A	p.P482T	ENST00000470360
P003	SARM1	hg19	chr17	26723006	26723006	+	Missense_Mutation	SNP	C	C	A	c.C1904A	p.P635H	ENST00000457710
P003	SLC22A16	hg19	chr6	110778203	110778203	+	Missense_Mutation	SNP	T	T	A	c.A71T	p.Y24F	ENST00000456137
P003	CDC27	hg19	chr17	45234327	45234327	+	Missense_Mutation	SNP	C	C	T	c.G653A	p.G218D	ENST00000575483
P003	CDC27	hg19	chr17	45234301	45234301	+	Missense_Mutation	SNP	C	C	A	c.G679T	p.A227S	ENST00000575483
P003	CDC27	hg19	chr17	45234367	45234367	+	Missense_Mutation	SNP	A	A	T	c.T754A	p.S252T	ENST00000531206
P003	CDC27	hg19	chr17	45234625	45234625	+	Missense_Mutation	SNP	C	C	A	c.G601T	p.V201F	ENST00000575483
P003	CDC27	hg19	chr17	45234397	45234397	+	Missense_Mutation	SNP	G	G	A	c.C724T	p.P242S	ENST00000531206
P003	CDC27	hg19	chr17	45234432	45234432	+	Missense_Mutation	SNP	G	G	T	c.C689A	p.S230Y	ENST00000531206
P003	CDC27	hg19	chr17	45247381	45247381	+	Missense_Mutation	SNP	A	A	G	c.T131C	p.L44P	ENST00000533415
P003	CDC27	hg19	chr17	45234386	45234386	+	Silent	SNP	G	G	T	c.C735A	p.V245V	ENST00000531206
P003	CDC27	hg19	chr17	45234300	45234300	+	Missense_Mutation	SNP	G	G	T	c.C680A	p.A227D	ENST00000575483
P003	CDC27	hg19	chr17	45247328	45247328	+	Missense_Mutation	SNP	C	C	T	c.G332A	p.G111D	ENST00000575483
P003	CDC27	hg19	chr17	45234350	45234350	+	Silent	SNP	C	C	T	c.G771A	p.Q257Q	ENST00000531206
P003	SLC4A1	hg19	chr17	42335832	42335832	+	Missense_Mutation	SNP	G	G	A	c.C1036T	p.R346C	ENST00000262418
P003	UPF1	hg19	chr19	18963076	18963076	+	Missense_Mutation	SNP	G	G	A	c.G943A	p.D315N	ENST00000599848
P003	UPF1	hg19	chr19	18974328	18974328	+	Missense_Mutation	SNP	G	G	T	c.G2715T	p.E905D	ENST00000599848
P003	BZRAP1	hg19	chr17	56400362	56400362	+	Silent	SNP	G	G	A	c.C1143T	p.R381R	ENST00000355701
P003	BZRAP1	hg19	chr17	56405054	56405054	+	Missense_Mutation	SNP	G	G	T	c.C228A	p.D76E	ENST00000355701
P003	BZRAP1	hg19	chr17	56387424	56387424	+	Silent	SNP	T	T	C	c.A3795G	p.E1265E	ENST00000355701
P003	MPO	hg19	chr17	56350258	56350258	+	Missense_Mutation	SNP	C	C	T	c.G1643A	p.R548Q	ENST00000225275
P003	WDR54	hg19	chr2	74649339	74649339	+	Missense_Mutation	SNP	A	A	G	c.A59G	p.N20S	ENST00000426787
P003	ZNF195	hg19	chr11	3383020	3383020	+	Missense_Mutation	SNP	T	T	C	c.A338G	p.N113S	ENST00000534569
P003	ZNF195	hg19	chr11	3383067	3383067	+	Silent	SNP	G	G	A	c.C291T	p.S97S	ENST00000534569
P003	ZNF195	hg19	chr11	3383256	3383256	+	Intron	DEL	T	T	-	c.233delA	p.K78fs	ENST00000533036
P003	ZNF195	hg19	chr11	3383052	3383052	+	Silent	SNP	T	T	C	c.A306G	p.S102S	ENST00000534569
P003	MYCBP2	hg19	chr13	77669613	77669613	+	Missense_Mutation	SNP	G	G	A	c.C9965T	p.P3322L	ENST00000357337
P003	PDK2	hg19	chr17	48186698	48186698	+	Silent	SNP	C	C	T	c.C825T	p.Y275Y	ENST00000007708
P003	ZFX	hg19	chrX	24197646	24197646	+	Silent	SNP	G	G	A	c.G405A	p.T135T	ENST00000379177
P003	GGNBP2	hg19	chr17	34934608	34934608	+	Silent	SNP	C	C	T	c.C837T	p.F279F	ENST00000304718
P003	YBX2	hg19	chr17	7193697	7193697	+	Missense_Mutation	SNP	G	G	T	c.C617A	p.P206H	ENST00000007699
P003	ABCC8	hg19	chr11	17430035	17430035	+	Missense_Mutation	SNP	C	C	A	c.G2694T	p.Q898H	ENST00000527905
P003	SPATA20	hg19	chr17	48628875	48628875	+	Missense_Mutation	SNP	T	T	C	c.T1400C	p.L467S	ENST00000393244
P003	SPATA20	hg19	chr17	48628964	48628964	+	Missense_Mutation	SNP	C	C	T	c.C1489T	p.R497W	ENST00000393244
P003	SPATA20	hg19	chr17	48625923	48625923	+	Missense_Mutation	SNP	G	G	T	c.G125T	p.W42L	ENST00000393244
P003	CACNA1G	hg19	chr17	48703789	48703789	+	Missense_Mutation	SNP	G	G	A	c.G6811A	p.A2271T	ENST00000359106
P003	TTC22	hg19	chr1	55251249	55251249	+	Silent	SNP	T	T	C	c.A1089G	p.R363R	ENST00000371274
P003	USH1C	hg19	chr11	17517181	17517181	+	Nonsense_Mutation	SNP	G	G	A	c.C2590T	p.R864X	ENST00000005226
P003	TBXA2R	hg19	chr19	3595010	3595010	+	Missense_Mutation	SNP	G	G	A	c.C1048T	p.R350C	ENST00000411851
P003	TBXA2R	hg19	chr19	3594993	3594993	+	Silent	SNP	G	G	A	c.C1065T	p.S355S	ENST00000411851
P003	TBXA2R	hg19	chr19	3595026	3595026	+	Silent	SNP	C	C	T	c.G1032A	p.S344S	ENST00000411851
P003	TBXA2R	hg19	chr19	3595009	3595009	+	Missense_Mutation	SNP	C	C	T	c.G1049A	p.R350H	ENST00000411851
P003	TBXA2R	hg19	chr19	3594985	3594985	+	Missense_Mutation	SNP	C	C	G	c.G1073C	p.R358P	ENST00000411851
P003	TBXA2R	hg19	chr19	3595002	3595002	+	Silent	SNP	C	C	T	c.G1056A	p.P352P	ENST00000411851
P003	TBXA2R	hg19	chr19	3595034	3595034	+	Missense_Mutation	SNP	T	T	C	c.A1024G	p.T342A	ENST00000411851
P003	TBXA2R	hg19	chr19	3595042	3595042	+	Missense_Mutation	SNP	T	T	C	c.A1016G	p.Y339C	ENST00000411851
P003	TBXA2R	hg19	chr19	3595003	3595003	+	Missense_Mutation	SNP	G	G	A	c.C1055T	p.P352L	ENST00000411851
P003	GTF2IRD1	hg19	chr7	73950576	73950576	+	Silent	SNP	C	C	T	c.C1380T	p.A460A	ENST00000476977
P003	ARHGAP44	hg19	chr17	12819244	12819244	+	Silent	SNP	G	G	A	c.G303A	p.T101T	ENST00000580768
P003	ARHGAP44	hg19	chr17	12887979	12887979	+	Nonsense_Mutation	SNP	G	G	T	c.G2071T	p.G691X	ENST00000379672
P003	SF1	hg19	chrX	2836137	2836137	+	Frame_Shift_Ins	INS	-	-	G	c.570dupC	p.E191fs	ENST00000377387
P003	ARSD	hg19	chrX	2826834	2826834	+	Missense_Mutation	SNP	G	G	A	c.C1348T	p.R450C	ENST00000381154
P003	CDKL3	hg19	chr5	133622141	133622141	+	IGR	SNP	C	C	T	c.G1015A	p.G339S	ENST00000435240
P003	CDKL3	hg19	chr5	133622160	133622160	+	IGR	SNP	C	C	A	c.G996T	p.V332V	ENST00000435240
P003	CDKL3	hg19	chr5	133622168	133622168	+	IGR	SNP	T	T	C	c.A988G	p.K330E	ENST00000435240
P003	DNAH9	hg19	chr17	11872670	11872670	+	Silent	SNP	G	G	A	c.G13287A	p.V4429V	ENST00000262442
P003	DNAH9	hg19	chr17	11672507	11672507	+	Missense_Mutation	SNP	G	G	T	c.G7413T	p.Q2471H	ENST00000454412
P003	DNAH9	hg19	chr17	11806120	11806120	+	Missense_Mutation	SNP	G	G	A	c.G11491A	p.E3831K	ENST00000454412
P003	KIAA0100	hg19	chr17	26942727	26942727	+	Silent	SNP	A	A	G	c.T6051C	p.F2017F	ENST00000544884
P003	KIAA0100	hg19	chr17	26962525	26962525	+	Missense_Mutation	SNP	C	C	A	c.G1651T	p.A551S	ENST00000544884
P003	SYN1	hg19	chrX	47433802	47433802	+	Missense_Mutation	SNP	C	C	A	c.G1581T	p.Q527H	ENST00000340666
P003	SYN1	hg19	chrX	47435800	47435800	+	Missense_Mutation	SNP	G	G	A	c.C986T	p.T329M	ENST00000340666
P003	CELSR3	hg19	chr3	48685709	48685709	+	Silent	SNP	C	C	T	c.G6978A	p.T2326T	ENST00000544264
P003	CELSR3	hg19	chr3	48682574	48682574	+	Silent	SNP	C	C	A	c.G7881T	p.V2627V	ENST00000544264
P003	MAPK8IP2	hg19	chr22	51039297	51039297	+	Missense_Mutation	SNP	C	C	T	c.C50T	p.S17L	ENST00000442429
P003	RHOBTB2	hg19	chr8	22865153	22865161	+	In_Frame_Del	DEL	CAACATTCT	CAACATTCT	-	c.1461_1469del	p.487_490del	ENST00000519685
P003	HEATR5B	hg19	chr2	37195648	37195648	+	IGR	SNP	G	G	A	c.C311T	p.P104L	ENST00000425467
P003	HEATR5B	hg19	chr2	37195651	37195651	+	IGR	SNP	T	T	C	c.A308G	p.Y103C	ENST00000425467
P003	TENM1	hg19	chrX	123775808	123775808	+	Missense_Mutation	SNP	C	C	T	c.G1910A	p.G637D	ENST00000422452
P003	TENM1	hg19	chrX	123519686	123519686	+	Missense_Mutation	SNP	G	G	A	c.C5917T	p.R1973C	ENST00000422452
P003	TENM1	hg19	chrX	123554283	123554283	+	Silent	SNP	G	G	A	c.C4860T	p.S1620S	ENST00000422452
P003	FAM76A	hg19	chr1	28086542	28086542	+	Intron	SNP	A	A	C	c.A350C	p.H117P	ENST00000446647
P003	FAM76A	hg19	chr1	28086552	28086552	+	Intron	SNP	A	A	G	c.A360G	p.L120L	ENST00000446647
P003	FAM76A	hg19	chr1	28086515	28086515	+	Intron	SNP	T	T	C	c.T323C	p.L108P	ENST00000446647
P003	FAM76A	hg19	chr1	28086537	28086537	+	Intron	SNP	A	A	G	c.A345G	p.Q115Q	ENST00000446647
P003	POMT2	hg19	chr14	77762514	77762514	+	Missense_Mutation	SNP	T	T	C	c.A1109G	p.Q370R	ENST00000261534
P003	NCAPD2	hg19	chr12	6626006	6626006	+	Missense_Mutation	SNP	C	C	T	c.C1000T	p.R334C	ENST00000315579
P003	NCAPD2	hg19	chr12	6635771	6635771	+	Missense_Mutation	SNP	G	G	T	c.G2724T	p.Q908H	ENST00000315579
P003	SEMA3G	hg19	chr3	52475614	52475614	+	Missense_Mutation	SNP	C	C	T	c.G643A	p.D215N	ENST00000231721
P003	NISCH	hg19	chr3	52525381	52525381	+	Missense_Mutation	SNP	G	G	T	c.G3756T	p.M1252I	ENST00000479054
P003	STAB1	hg19	chr3	52536682	52536682	+	Silent	SNP	G	G	T	c.G522T	p.G174G	ENST00000321725
P003	STAB1	hg19	chr3	52544491	52544491	+	Missense_Mutation	SNP	G	G	A	c.G2755A	p.D919N	ENST00000321725
P003	STAB1	hg19	chr3	52544494	52544494	+	Missense_Mutation	SNP	G	G	A	c.G2758A	p.A920T	ENST00000321725
P003	SLC6A13	hg19	chr12	344275	344275	+	Missense_Mutation	SNP	G	G	A	c.C812T	p.T271M	ENST00000343164
P003	FYN	hg19	chr6	111983140	111983140	+	Missense_Mutation	SNP	G	G	T	c.C1407A	p.N469K	ENST00000368682
P003	CLCN6	hg19	chr1	11888664	11888664	+	Silent	SNP	G	G	T	c.G1104T	p.P368P	ENST00000376496
P003	NME1-NME2	hg19	chr17	49231796	49231796	+	Missense_Mutation	SNP	G	G	T	c.G62T	p.C21F	ENST00000608447
P003	WIZ	hg19	chr19	15549942	15549942	+	Intron	SNP	C	C	T	c.G1719A	p.E573E	ENST00000389282
P003	DCN	hg19	chr12	91563626	91563626	+	Intron	SNP	A	A	G	c.T260C	p.I87T	ENST00000546370
P003	DCN	hg19	chr12	91563634	91563634	+	Intron	SNP	A	A	T	c.T252A	p.D84E	ENST00000546370
P003	DCN	hg19	chr12	91563622	91563622	+	Intron	SNP	C	C	T	c.G264A	p.S88S	ENST00000546370
P003	DCN	hg19	chr12	91563656	91563656	+	Intron	SNP	C	C	T	c.G230A	p.R77H	ENST00000546370
P003	DCN	hg19	chr12	91563633	91563633	+	Intron	SNP	G	G	C	c.C253G	p.L85V	ENST00000546370
P003	MAN2B2	hg19	chr4	6580158	6580158	+	Silent	SNP	C	C	G	c.C324G	p.V108V	ENST00000504248
P003	SLC25A39	hg19	chr17	42399084	42399084	+	Missense_Mutation	SNP	C	C	T	c.G352A	p.G118S	ENST00000590194
P003	DDX11	hg19	chr12	31237978	31237978	+	Missense_Mutation	SNP	C	C	T	c.C556T	p.R186W	ENST00000545668
P003	DDX11	hg19	chr12	31244665	31244665	+	Missense_Mutation	SNP	C	C	T	c.C1102T	p.P368S	ENST00000545668
P003	CCDC88C	hg19	chr14	91776252	91776252	+	Missense_Mutation	SNP	C	C	T	c.G2815A	p.G939S	ENST00000389857
P003	CCDC88C	hg19	chr14	91766287	91766287	+	Missense_Mutation	SNP	G	G	A	c.C3763T	p.R1255W	ENST00000389857
P003	WAS	hg19	chrX	48545241	48545241	+	Nonsense_Mutation	SNP	C	C	T	c.C631T	p.R211X	ENST00000450772
P003	WAS	hg19	chrX	48543993	48543993	+	Missense_Mutation	SNP	A	A	C	c.A331C	p.T111P	ENST00000450772
P003	XYLT2	hg19	chr17	48433245	48433245	+	Missense_Mutation	SNP	G	G	T	c.G1192T	p.G398C	ENST00000507602
P003	XYLT2	hg19	chr17	48433490	48433490	+	Silent	SNP	C	C	A	c.C1350A	p.T450T	ENST00000507602
P003	CHDH	hg19	chr3	53852145	53852145	+	Nonsense_Mutation	SNP	G	G	A	c.C1444T	p.R482X	ENST00000315251
P003	RALBP1	hg19	chr18	9535709	9535709	+	Missense_Mutation	SNP	G	G	A	c.G1742A	p.R581H	ENST00000383432
P003	SLC11A1	hg19	chr2	219250180	219250180	+	Intron	SNP	G	G	C	c.G11C	p.C4S	ENST00000539932
P003	ATP1A2	hg19	chr1	160090718	160090718	+	Missense_Mutation	SNP	C	C	T	c.C35T	p.A12V	ENST00000392233
P003	SYT13	hg19	chr11	45277264	45277264	+	Missense_Mutation	SNP	C	C	T	c.G362A	p.R121H	ENST00000020926
P003	CD74	hg19	chr5	149785825	149785825	+	Missense_Mutation	SNP	G	G	A	c.C358T	p.P120S	ENST00000522246
P003	NCDN	hg19	chr1	36028184	36028184	+	Silent	SNP	G	G	T	c.G1335T	p.L445L	ENST00000356090
P003	NCDN	hg19	chr1	36028117	36028117	+	Missense_Mutation	SNP	G	G	A	c.G1268A	p.R423H	ENST00000356090
P003	CYP3A43	hg19	chr7	99436341	99436341	+	Silent	SNP	G	G	A	c.G207A	p.T69T	ENST00000417625
P003	CYP3A43	hg19	chr7	99436377	99436377	+	Silent	SNP	A	A	T	c.A243T	p.G81G	ENST00000417625
P003	CYP3A43	hg19	chr7	99436371	99436371	+	Silent	SNP	A	A	G	c.A237G	p.E79E	ENST00000417625
P003	CYP3A43	hg19	chr7	99436368	99436368	+	Silent	SNP	T	T	C	c.T234C	p.A78A	ENST00000417625
P003	NRXN3	hg19	chr14	79181337	79181337	+	Silent	SNP	G	G	A	c.G1893A	p.A631A	ENST00000554738
P003	OSBPL5	hg19	chr11	3125590	3125590	+	Silent	SNP	C	C	T	c.G1077A	p.Q359Q	ENST00000263650
P003	NLRP2	hg19	chr19	55485475	55485475	+	Intron	SNP	A	A	G	c.A59G	p.N20S	ENST00000397169
P003	RB1CC1	hg19	chr8	53596162	53596162	+	Missense_Mutation	SNP	G	G	T	c.C316A	p.L106I	ENST00000435644
P003	STRAP	hg19	chr12	16035718	16035718	+	Missense_Mutation	SNP	C	C	A	c.C71A	p.T24K	ENST00000541731
P003	NR1H3	hg19	chr11	47283281	47283281	+	Intron	SNP	G	G	C	c.G757C	p.A253P	ENST00000481889
P003	TYMP	hg19	chr22	50966143	50966143	+	Missense_Mutation	SNP	G	G	T	c.C520A	p.Q174K	ENST00000395681
P003	KPNA6	hg19	chr1	32628012	32628012	+	Silent	SNP	G	G	A	c.G813A	p.S271S	ENST00000545542
P003	RNASET2	hg19	chr6	167369669	167369669	+	Missense_Mutation	SNP	A	A	G	c.T2C	p.M1T	ENST00000478180
P003	CD44	hg19	chr11	35198118	35198118	+	Intron	SNP	A	A	C	c.A1C	p.I1L	ENST00000525211
P003	CD44	hg19	chr11	35198175	35198175	+	Missense_Mutation	SNP	C	C	T	c.C121T	p.R41C	ENST00000526669
P003	BTN3A1	hg19	chr6	26413468	26413468	+	Missense_Mutation	SNP	C	C	T	c.C934T	p.R312C	ENST00000414912
P003	B4GALT7	hg19	chr5	177036626	177036626	+	Missense_Mutation	SNP	C	C	A	c.C914A	p.A305D	ENST00000029410
P003	ANK1	hg19	chr8	41572510	41572510	+	Missense_Mutation	SNP	G	G	A	c.C1685T	p.P562L	ENST00000396945
P003	ANK1	hg19	chr8	41575681	41575681	+	Silent	SNP	G	G	A	c.C1149T	p.H383H	ENST00000396945
P003	ANK1	hg19	chr8	41551573	41551573	+	Missense_Mutation	SNP	C	C	A	c.G3498T	p.Q1166H	ENST00000265709
P003	ANK1	hg19	chr8	41530247	41530247	+	Missense_Mutation	SNP	G	G	A	c.C4844T	p.T1615M	ENST00000265709
P003	RABEP1	hg19	chr17	5266302	5266302	+	Silent	SNP	G	G	A	c.G1659A	p.T553T	ENST00000546142
P003	IKZF2	hg19	chr2	213872622	213872622	+	Missense_Mutation	SNP	G	G	T	c.C1043A	p.A348D	ENST00000434687
P003	GRN	hg19	chr17	42427893	42427893	+	Missense_Mutation	SNP	G	G	A	c.G526A	p.G176R	ENST00000586782
P003	LRRC7	hg19	chr1	70144068	70144068	+	IGR	SNP	G	G	A	c.G7A	p.E3K	ENST00000370958
P003	LRRC7	hg19	chr1	70503979	70503979	+	Silent	SNP	C	C	T	c.C2373T	p.A791A	ENST00000310961
P003	MYOC	hg19	chr1	171621376	171621376	+	Missense_Mutation	SNP	G	G	A	c.C376T	p.R126W	ENST00000037502
P003	VCL	hg19	chr10	75854211	75854211	+	Missense_Mutation	SNP	G	G	A	c.G1535A	p.R512H	ENST00000372755
P003	USP2	hg19	chr11	119230331	119230331	+	Missense_Mutation	SNP	G	G	A	c.C865T	p.R289W	ENST00000260187
P003	CASR	hg19	chr3	122002993	122002993	+	Missense_Mutation	SNP	G	G	T	c.G2222T	p.C741F	ENST00000498619
P003	BOD1L1	hg19	chr4	13627900	13627900	+	Intron	SNP	A	A	G	c.T280C	p.X94R	ENST00000482713
P003	CLEC16A	hg19	chr16	11114088	11114088	+	Nonsense_Mutation	SNP	G	G	T	c.G1342T	p.E448X	ENST00000409790
P003	CLEC16A	hg19	chr16	11073187	11073187	+	Missense_Mutation	SNP	G	G	T	c.G905T	p.G302V	ENST00000409790
P003	DNAH5	hg19	chr5	13708285	13708285	+	Nonsense_Mutation	SNP	G	G	A	c.C13285T	p.R4429X	ENST00000265104
P003	RAI14	hg19	chr5	34808726	34808726	+	Missense_Mutation	SNP	C	C	G	c.C426G	p.C142W	ENST00000515799
P003	RTN4R	hg19	chr22	20230453	20230453	+	Missense_Mutation	SNP	C	C	T	c.G203A	p.R68H	ENST00000043402
P003	PHF23	hg19	chr17	7139413	7139413	+	Missense_Mutation	SNP	G	G	C	c.C443G	p.P148R	ENST00000572789
P003	RETSAT	hg19	chr2	85577364	85577364	+	Missense_Mutation	SNP	C	C	T	c.G598A	p.V200M	ENST00000295802
P003	TG	hg19	chr8	133882046	133882046	+	Silent	SNP	C	C	T	c.C249T	p.S83S	ENST00000377869
P003	TG	hg19	chr8	134108491	134108491	+	Silent	SNP	G	G	C	c.G7446C	p.V2482V	ENST00000220616
P003	ZIC2	hg19	chr13	100635008	100635010	+	In_Frame_Del	DEL	CCA	CCA	-	c.690_692del	p.230_231del	ENST00000376335
P003	PHKA2	hg19	chrX	18912358	18912358	+	Silent	SNP	G	G	A	c.C3501T	p.I1167I	ENST00000379942
P003	PHKA2	hg19	chrX	18942595	18942595	+	Missense_Mutation	SNP	C	C	T	c.G1618A	p.V540M	ENST00000379942
P003	GEMIN8	hg19	chrX	14027108	14027108	+	Missense_Mutation	SNP	G	G	A	c.C653T	p.A218V	ENST00000380523
P003	GEMIN8	hg19	chrX	14027075	14027075	+	Missense_Mutation	SNP	C	C	T	c.G686A	p.R229Q	ENST00000380523
P003	OFD1	hg19	chrX	13778781	13778781	+	Silent	SNP	C	C	A	c.C1782A	p.L594L	ENST00000380567
P003	ARHGAP6	hg19	chrX	11196301	11196301	+	Silent	SNP	G	G	A	c.C1644T	p.C548C	ENST00000495242
P003	ARHGAP6	hg19	chrX	11204525	11204525	+	Silent	SNP	G	G	A	c.C1200T	p.T400T	ENST00000495242
P003	FAM184B	hg19	chr4	17660144	17660144	+	Silent	SNP	G	G	A	c.C1866T	p.N622N	ENST00000265018
P003	VPS13D	hg19	chr1	12445382	12445382	+	Missense_Mutation	SNP	G	G	A	c.G11434A	p.E3812K	ENST00000358136
P003	CELF2	hg19	chr10	11363349	11363349	+	Missense_Mutation	SNP	G	G	T	c.G1195T	p.G399C	ENST00000608830
P003	CELF2	hg19	chr10	11299811	11299811	+	Missense_Mutation	SNP	C	C	T	c.C421T	p.R141W	ENST00000608830
P003	CELF2	hg19	chr10	11317064	11317064	+	Silent	SNP	C	C	T	c.C729T	p.S243S	ENST00000608830
P003	EPN3	hg19	chr17	48615553	48615553	+	Nonsense_Mutation	SNP	G	G	T	c.G508T	p.E170X	ENST00000541226
P003	EPN3	hg19	chr17	48610239	48610239	+	5'UTR	SNP	G	G	T	c.G4T	p.A2S	ENST00000537145
P003	EPN3	hg19	chr17	48616311	48616311	+	Nonsense_Mutation	SNP	C	C	T	c.C748T	p.Q250X	ENST00000268933
P003	KIAA2022	hg19	chrX	73964130	73964130	+	Missense_Mutation	SNP	C	C	T	c.G262A	p.E88K	ENST00000055682
P003	KIAA2022	hg19	chrX	73963481	73963481	+	Missense_Mutation	SNP	C	C	T	c.G911A	p.G304D	ENST00000055682
P003	SLC4A8	hg19	chr12	51873986	51873986	+	Missense_Mutation	SNP	A	A	G	c.A2224G	p.M742V	ENST00000514353
P003	SLC4A8	hg19	chr12	51873930	51873930	+	Nonsense_Mutation	SNP	G	G	A	c.G2168A	p.W723X	ENST00000514353
P003	SLC4A8	hg19	chr12	51873951	51873951	+	Missense_Mutation	SNP	T	T	C	c.T2189C	p.L730P	ENST00000514353
P003	SLC4A8	hg19	chr12	51873922	51873922	+	Silent	SNP	C	C	A	c.C2160A	p.S720S	ENST00000514353
P003	SLC4A8	hg19	chr12	51873925	51873925	+	Silent	SNP	A	A	G	c.A2163G	p.P721P	ENST00000514353
P003	SLC4A8	hg19	chr12	51873914	51873914	+	Missense_Mutation	SNP	G	G	A	c.G2152A	p.G718R	ENST00000514353
P003	COL23A1	hg19	chr5	177683874	177683874	+	Missense_Mutation	SNP	C	C	A	c.G830T	p.G277V	ENST00000390654
P003	SIKE1	hg19	chr1	115323200	115323200	+	Missense_Mutation	SNP	G	G	A	c.C29T	p.T10I	ENST00000369528
P003	FOXN3	hg19	chr14	89799586	89799586	+	Intron	SNP	G	G	C	c.C257G	p.S86C	ENST00000554005
P003	FOXN3	hg19	chr14	89799569	89799569	+	Intron	SNP	A	A	G	c.T274C	p.X92R	ENST00000554005
P003	FOXN3	hg19	chr14	89799576	89799576	+	Intron	SNP	G	G	T	c.C267A	p.G89G	ENST00000554005
P003	MCF2L2	hg19	chr3	182925576	182925576	+	Silent	SNP	G	G	A	c.C2532T	p.H844H	ENST00000473233
P003	LAMA3	hg19	chr18	21461936	21461936	+	Missense_Mutation	SNP	C	C	T	c.C5149T	p.R1717C	ENST00000399516
P003	LAMA3	hg19	chr18	21338466	21338466	+	Nonsense_Mutation	SNP	G	G	T	c.G1054T	p.E352X	ENST00000585600
P003	LY75	hg19	chr2	160755473	160755473	+	Missense_Mutation	SNP	G	G	T	c.C192A	p.D64E	ENST00000554112
P003	PTPRN	hg19	chr2	220167516	220167516	+	Missense_Mutation	SNP	G	G	T	c.C151A	p.L51I	ENST00000451506
P003	TBC1D22A	hg19	chr22	47185243	47185243	+	Intron	SNP	C	C	T	c.C97T	p.R33X	ENST00000441936
P003	TBC1D22A	hg19	chr22	47185246	47185246	+	Intron	SNP	T	T	A	c.T100A	p.S34T	ENST00000441936
P003	TBC1D22A	hg19	chr22	47185236	47185236	+	Intron	SNP	A	A	C	c.A90C	p.G30G	ENST00000441936
P003	SYNE2	hg19	chr14	64678805	64678805	+	Missense_Mutation	SNP	C	C	T	c.C18727T	p.R6243C	ENST00000554584
P003	PLEKHH1	hg19	chr14	68029451	68029451	+	Missense_Mutation	SNP	C	C	T	c.C1103T	p.A368V	ENST00000329153
P003	CHRDL2	hg19	chr11	74407545	74407545	+	Nonstop_Mutation	SNP	A	A	G	c.T1354C	p.X452Q	ENST00000263671
P003	ITIH4	hg19	chr3	52860837	52860837	+	Silent	SNP	C	C	T	c.G489A	p.V163V	ENST00000485816
P003	ITIH4	hg19	chr3	52848081	52848081	+	Missense_Mutation	SNP	A	A	G	c.T2648C	p.F883S	ENST00000485816
P003	ITIH4	hg19	chr3	52852538	52852538	+	Missense_Mutation	SNP	G	G	T	c.C2107A	p.P703T	ENST00000485816
P003	PHF21B	hg19	chr22	45285651	45285651	+	Missense_Mutation	SNP	G	G	T	c.C415A	p.P139T	ENST00000403565
P003	TRAF1	hg19	chr9	123673724	123673724	+	Missense_Mutation	SNP	C	C	T	c.G773A	p.R258H	ENST00000540010
P003	GYG2	hg19	chrX	2773181	2773181	+	Missense_Mutation	SNP	C	C	A	c.C565A	p.H189N	ENST00000542787
P003	PKP2	hg19	chr12	32996162	32996162	+	Silent	SNP	G	G	A	c.C1464T	p.G488G	ENST00000070846
P003	PKP2	hg19	chr12	32996161	32996161	+	Missense_Mutation	SNP	C	C	T	c.G1465A	p.G489R	ENST00000070846
P003	PKP2	hg19	chr12	32996136	32996136	+	Missense_Mutation	SNP	C	C	T	c.G1490A	p.R497Q	ENST00000070846
P003	PKP2	hg19	chr12	33021925	33021925	+	Missense_Mutation	SNP	C	C	A	c.G1106T	p.R369M	ENST00000340811
P003	PKP2	hg19	chr12	32996166	32996166	+	Missense_Mutation	SNP	T	T	C	c.A1460G	p.Q487R	ENST00000070846
P003	PKP2	hg19	chr12	32996158	32996158	+	Missense_Mutation	SNP	G	G	A	c.C1468T	p.R490W	ENST00000070846
P003	MTA3	hg19	chr2	42808968	42808968	+	Intron	SNP	A	A	G	c.A234G	p.A78A	ENST00000430763
P003	MTA3	hg19	chr2	42808934	42808934	+	Intron	SNP	T	T	C	c.T200C	p.F67S	ENST00000430763
P003	CROCC	hg19	chr1	17282544	17282544	+	Missense_Mutation	SNP	G	G	A	c.G3757A	p.A1253T	ENST00000375541
P003	NDC1	hg19	chr1	54252850	54252850	+	Missense_Mutation	SNP	G	G	T	c.C1781A	p.T594N	ENST00000371429
P003	NDC1	hg19	chr1	54293820	54293820	+	Missense_Mutation	SNP	G	G	T	c.C307A	p.L103I	ENST00000540001
P003	DGKG	hg19	chr3	186006621	186006621	+	Missense_Mutation	SNP	G	G	A	c.C422T	p.A141V	ENST00000544847
P003	UNKL	hg19	chr16	1419937	1419937	+	Missense_Mutation	SNP	T	T	C	c.A71G	p.N24S	ENST00000248104
P003	UNKL	hg19	chr16	1419942	1419942	+	Missense_Mutation	SNP	G	G	C	c.C66G	p.D22E	ENST00000248104
P003	PTPRU	hg19	chr1	29650168	29650168	+	Missense_Mutation	SNP	G	G	A	c.G3992A	p.R1331Q	ENST00000460170
P003	SNRNP40	hg19	chr1	31733913	31733913	+	Intron	SNP	C	C	T	c.G1135A	p.A379T	ENST00000446633
P003	SNRNP40	hg19	chr1	31733914	31733914	+	Intron	SNP	A	A	G	c.T1134C	p.C378C	ENST00000446633
P003	SNRNP40	hg19	chr1	31733916	31733916	+	Intron	SNP	A	A	G	c.T1132C	p.C378R	ENST00000446633
P003	SNRNP40	hg19	chr1	31733953	31733953	+	Intron	SNP	T	T	C	c.A1095G	p.S365S	ENST00000446633
P003	SNRNP40	hg19	chr1	31733915	31733915	+	Intron	SNP	C	C	T	c.G1133A	p.C378Y	ENST00000446633
P003	SFSWAP	hg19	chr12	132237680	132237680	+	Missense_Mutation	SNP	C	C	G	c.C1094G	p.A365G	ENST00000541286
P003	TNK2	hg19	chr3	195595229	195595229	+	Frame_Shift_Del	DEL	G	G	-	c.2129delC	p.P710fs	ENST00000381916
P003	TNK2	hg19	chr3	195594393	195594393	+	Missense_Mutation	SNP	G	G	T	c.C2965A	p.P989T	ENST00000381916
P003	ARSF	hg19	chrX	2994616	2994616	+	Silent	SNP	G	G	A	c.G189A	p.R63R	ENST00000381127
P003	AHRR	hg19	chr5	433025	433025	+	Missense_Mutation	SNP	G	G	T	c.G1141T	p.G381C	ENST00000316418
P003	ZNF275	hg19	chrX	152609662	152609662	+	Intron	SNP	G	G	T	c.G7T	p.E3X	ENST00000440091
P003	MTMR1	hg19	chrX	149867711	149867711	+	Missense_Mutation	SNP	G	G	T	c.G190T	p.A64S	ENST00000544228
P003	ADCK1	hg19	chr14	78366909	78366909	+	Intron	SNP	A	A	G	c.A590G	p.Q197R	ENST00000393639
P003	ASUN	hg19	chr12	27064187	27064187	+	Silent	SNP	C	C	A	c.G1869T	p.S623S	ENST00000261191
P003	DMRT3	hg19	chr9	990618	990618	+	Silent	SNP	C	C	T	c.C1032T	p.A344A	ENST00000190165
P003	ABCA7	hg19	chr19	1053462	1053462	+	Nonsense_Mutation	SNP	G	G	T	c.G3355T	p.E1119X	ENST00000263094
P003	ANKS1A	hg19	chr6	35048845	35048845	+	Silent	SNP	G	G	T	c.G2619T	p.L873L	ENST00000360359
P003	ANKS1A	hg19	chr6	35047440	35047440	+	Missense_Mutation	SNP	G	G	A	c.G2431A	p.V811I	ENST00000360359
P003	ZNF76	hg19	chr6	35260488	35260488	+	Missense_Mutation	SNP	C	C	A	c.C1089A	p.H363Q	ENST00000373953
P003	ERBB3	hg19	chr12	56478854	56478854	+	Missense_Mutation	SNP	G	G	A	c.G310A	p.V104M	ENST00000549282
P003	ADAT1	hg19	chr16	75632214	75632214	+	3'Flank	SNP	T	T	C	c.A318G	p.A106A	ENST00000566450
P003	SPEN	hg19	chr1	16258505	16258505	+	Missense_Mutation	SNP	G	G	A	c.G5770A	p.V1924I	ENST00000375759
P003	MYLK	hg19	chr3	123453011	123453011	+	Missense_Mutation	SNP	C	C	T	c.G832A	p.V278I	ENST00000360772
P003	ASPM	hg19	chr1	197072241	197072241	+	Missense_Mutation	SNP	G	G	T	c.C6140A	p.A2047E	ENST00000367409
P003	CD84	hg19	chr1	160523781	160523781	+	Missense_Mutation	SNP	G	G	T	c.C544A	p.Q182K	ENST00000368054
P003	EML1	hg19	chr14	100402400	100402400	+	Missense_Mutation	SNP	C	C	G	c.C2001G	p.N667K	ENST00000334192
P003	MSANTD3	hg19	chr9	103204373	103204373	+	Silent	SNP	G	G	A	c.G153A	p.A51A	ENST00000398977
P003	KIF26A	hg19	chr14	104643204	104643204	+	Frame_Shift_Del	DEL	C	C	-	c.4079delC	p.A1360fs	ENST00000423312
P003	PFKP	hg19	chr10	3162192	3162192	+	Missense_Mutation	SNP	G	G	A	c.G1615A	p.D539N	ENST00000381075
P003	PHKA1	hg19	chrX	71802311	71802311	+	Silent	SNP	G	G	T	c.C3486A	p.I1162I	ENST00000373539
P003	PRKCZ	hg19	chr1	1990985	1990985	+	Missense_Mutation	SNP	C	C	T	c.C151T	p.P51S	ENST00000503297
P003	PRKCZ	hg19	chr1	1986980	1986980	+	Missense_Mutation	SNP	C	C	A	c.C34A	p.L12I	ENST00000503297
P003	PRKCZ	hg19	chr1	2013792	2013792	+	Intron	SNP	C	C	T	c.C33T	p.A11A	ENST00000481140
P003	IDH3G	hg19	chrX	153052939	153052939	+	Silent	SNP	G	G	C	c.C585G	p.A195A	ENST00000444450
P003	IDH3G	hg19	chrX	153052948	153052948	+	Silent	SNP	T	T	C	c.A576G	p.K192K	ENST00000444450
P003	IDH3G	hg19	chrX	153052943	153052943	+	Missense_Mutation	SNP	G	G	A	c.C581T	p.T194M	ENST00000444450
P003	IDH3G	hg19	chrX	153051621	153051621	+	Missense_Mutation	SNP	G	G	A	c.C1126T	p.P376S	ENST00000370092
P003	IDH3G	hg19	chrX	153052940	153052940	+	Missense_Mutation	SNP	G	G	A	c.C584T	p.A195V	ENST00000444450
P003	IDH3G	hg19	chrX	153053299	153053299	+	Missense_Mutation	SNP	C	C	A	c.G450T	p.E150D	ENST00000444450
P003	FGFR3	hg19	chr4	1806668	1806668	+	Missense_Mutation	SNP	G	G	A	c.G1387A	p.D463N	ENST00000481110
P003	TFE3	hg19	chrX	48891050	48891050	+	Missense_Mutation	SNP	G	G	A	c.C1066T	p.R356C	ENST00000315869
P003	TBC1D25	hg19	chrX	48418406	48418406	+	Silent	SNP	C	C	A	c.C1110A	p.G370G	ENST00000376771
P003	TBC1D25	hg19	chrX	48418415	48418415	+	Missense_Mutation	SNP	G	G	T	c.G1119T	p.M373I	ENST00000376771
P003	ACSL4	hg19	chrX	108921572	108921572	+	Missense_Mutation	SNP	C	C	A	c.G851T	p.R284L	ENST00000340800
P003	GPKOW	hg19	chrX	48978974	48978974	+	Missense_Mutation	SNP	G	G	A	c.C329T	p.A110V	ENST00000156109
P003	GRIPAP1	hg19	chrX	48838076	48838076	+	Missense_Mutation	SNP	G	G	A	c.C1705T	p.R569W	ENST00000376441
P003	ATP11A	hg19	chr13	113536244	113536244	+	Nonsense_Mutation	SNP	C	C	T	c.C3442T	p.Q1148X	ENST00000375630
P003	POLR1A	hg19	chr2	86280077	86280077	+	Missense_Mutation	SNP	G	G	A	c.C2255T	p.A752V	ENST00000409681
P003	POLR1A	hg19	chr2	86255782	86255782	+	Missense_Mutation	SNP	G	G	A	c.C4649T	p.T1550M	ENST00000409681
P003	TTC7A	hg19	chr2	47144396	47144396	+	Missense_Mutation	SNP	C	C	A	c.C62A	p.P21Q	ENST00000409245
P003	TTC7A	hg19	chr2	47178799	47178799	+	Intron	SNP	T	T	C	c.T407C	p.L136P	ENST00000536057
P003	TTC7A	hg19	chr2	47256372	47256372	+	Missense_Mutation	SNP	G	G	T	c.G1549T	p.A517S	ENST00000409245
P003	IP6K2	hg19	chr3	48725848	48725848	+	Missense_Mutation	SNP	C	C	T	c.G1139A	p.R380H	ENST00000328631
P003	IP6K2	hg19	chr3	48732763	48732763	+	Missense_Mutation	SNP	G	G	A	c.C124T	p.R42C	ENST00000424035
P003	GPR116	hg19	chr6	46839609	46839609	+	Missense_Mutation	SNP	G	G	T	c.C1382A	p.A461E	ENST00000362015
P003	GAL	hg19	chr11	68455549	68455549	+	Silent	SNP	C	C	T	c.C204T	p.P68P	ENST00000265643
P003	CLEC2D	hg19	chr12	9846441	9846441	+	Intron	SNP	A	A	G	c.A311G	p.Y104C	ENST00000460309
P003	CECR5	hg19	chr22	17619542	17619542	+	Frame_Shift_Del	DEL	C	C	-	c.833delG	p.G278fs	ENST00000336737
P003	CECR5	hg19	chr22	17630548	17630548	+	Nonsense_Mutation	SNP	G	G	A	c.C214T	p.R72X	ENST00000336737
P003	UFD1L	hg19	chr22	19445645	19445645	+	Silent	SNP	C	C	T	c.G513A	p.V171V	ENST00000399523
P003	UFD1L	hg19	chr22	19445608	19445608	+	Missense_Mutation	SNP	C	C	T	c.G550A	p.E184K	ENST00000399523
P003	SPTB	hg19	chr14	65218930	65218930	+	Intron	SNP	C	C	T	c.G2701A	p.V901M	ENST00000553938
P003	DAPP1	hg19	chr4	100756790	100756790	+	Missense_Mutation	SNP	G	G	A	c.G112A	p.G38S	ENST00000512369
P003	DAPP1	hg19	chr4	100761493	100761493	+	Nonsense_Mutation	SNP	C	C	A	c.C272A	p.S91X	ENST00000512369
P003	CLTCL1	hg19	chr22	19208976	19208976	+	Missense_Mutation	SNP	C	C	T	c.G2720A	p.R907H	ENST00000505027
P003	CLTCL1	hg19	chr22	19187331	19187331	+	Nonsense_Mutation	SNP	C	C	T	c.G3725A	p.W1242X	ENST00000505027
P003	CLTCL1	hg19	chr22	19241503	19241503	+	Silent	SNP	C	C	A	c.G498T	p.L166L	ENST00000505027
P003	DGCR2	hg19	chr22	19048313	19048313	+	Intron	SNP	A	A	G	c.T772C	p.C258R	ENST00000545799
P003	ZXDC	hg19	chr3	126157257	126157257	+	Silent	SNP	C	C	T	c.G2538A	p.Q846Q	ENST00000389709
P003	ST6GALNAC1	hg19	chr17	74622471	74622471	+	Missense_Mutation	SNP	C	C	T	c.G1315A	p.V439I	ENST00000156626
P003	ST6GALNAC2	hg19	chr17	74568826	74568826	+	Missense_Mutation	SNP	G	G	A	c.C562T	p.R188C	ENST00000225276
P003	PABPC1	hg19	chr8	101719201	101719201	+	Missense_Mutation	SNP	A	A	G	c.T1265C	p.I422T	ENST00000522387
P003	PABPC1	hg19	chr8	101717182	101717182	+	Missense_Mutation	SNP	A	A	G	c.T1694C	p.L565P	ENST00000522387
P003	PABPC1	hg19	chr8	101719138	101719138	+	Missense_Mutation	SNP	C	C	T	c.G1328A	p.R443Q	ENST00000522387
P003	PABPC1	hg19	chr8	101717195	101717195	+	Missense_Mutation	SNP	G	G	C	c.C1681G	p.L561V	ENST00000522387
P003	TESK2	hg19	chr1	45812672	45812672	+	Silent	SNP	C	C	T	c.G771A	p.P257P	ENST00000372086
P003	PTPN21	hg19	chr14	88946074	88946074	+	Silent	SNP	T	T	G	c.A1701C	p.P567P	ENST00000556564
P003	EIF2B3	hg19	chr1	45446797	45446797	+	Missense_Mutation	SNP	C	C	T	c.G44A	p.R15Q	ENST00000372183
P003	TCOF1	hg19	chr5	149758955	149758955	+	Missense_Mutation	SNP	C	C	T	c.C2642T	p.A881V	ENST00000513346
P003	TCOF1	hg19	chr5	149759273	149759273	+	Missense_Mutation	SNP	C	C	T	c.C2837T	p.P946L	ENST00000513346
P003	TRPM5	hg19	chr11	2439805	2439805	+	Missense_Mutation	SNP	C	C	A	c.G648T	p.E216D	ENST00000533881
P003	WDR1	hg19	chr4	10089452	10089452	+	Missense_Mutation	SNP	G	G	A	c.C830T	p.T277M	ENST00000499869
P003	SNX13	hg19	chr7	17922538	17922538	+	Intron	SNP	T	T	C	c.A469G	p.T157A	ENST00000409604
P003	VASH1	hg19	chr14	77236329	77236329	+	Silent	SNP	G	G	A	c.G333A	p.T111T	ENST00000554237
P003	ATP6AP1	hg19	chrX	153662789	153662789	+	Missense_Mutation	SNP	C	C	T	c.C920T	p.A307V	ENST00000369762
P003	FAM3A	hg19	chrX	153736912	153736912	+	Silent	SNP	C	C	T	c.G168A	p.K56K	ENST00000369643
P003	ZFYVE26	hg19	chr14	68274396	68274396	+	Missense_Mutation	SNP	C	C	T	c.G605A	p.R202Q	ENST00000555452
P003	EPN2	hg19	chr17	19187000	19187000	+	Missense_Mutation	SNP	G	G	A	c.G568A	p.G190R	ENST00000395628
P003	EPN2	hg19	chr17	19187003	19187003	+	Missense_Mutation	SNP	G	G	T	c.G571T	p.G191C	ENST00000395628
P003	SPEG	hg19	chr2	220342031	220342031	+	Silent	SNP	G	G	A	c.G4593A	p.V1531V	ENST00000312358
P003	SREBF1	hg19	chr17	17718042	17718042	+	Missense_Mutation	SNP	C	C	A	c.G2712T	p.K904N	ENST00000355815
P003	TRPC5	hg19	chrX	111155755	111155755	+	Missense_Mutation	SNP	G	G	A	c.C664T	p.R222C	ENST00000262839
P003	SMC1A	hg19	chrX	53432540	53432540	+	Missense_Mutation	SNP	C	C	T	c.G1796A	p.R599H	ENST00000322213
P003	HSD17B10	hg19	chrX	53460787	53460787	+	Missense_Mutation	SNP	G	G	A	c.C74T	p.A25V	ENST00000375304
P003	TRNT1	hg19	chr3	3182294	3182294	+	Missense_Mutation	SNP	C	C	T	c.C443T	p.A148V	ENST00000434583
P003	MRVI1	hg19	chr11	10647649	10647649	+	Missense_Mutation	SNP	G	G	T	c.C287A	p.A96D	ENST00000558540
P003	TMEM38A	hg19	chr19	16799173	16799173	+	Missense_Mutation	SNP	G	G	T	c.G891T	p.K297N	ENST00000187762
P003	MCM2	hg19	chr3	127339610	127339610	+	Missense_Mutation	SNP	C	C	T	c.C2335T	p.R779C	ENST00000265056
P003	TP63	hg19	chr3	189612001	189612001	+	Missense_Mutation	SNP	G	G	T	c.G1741T	p.A581S	ENST00000440651
P003	LLGL2	hg19	chr17	73565343	73565343	+	Silent	SNP	C	C	A	c.C1518A	p.G506G	ENST00000577200
P003	NLE1	hg19	chr17	33466946	33466946	+	Missense_Mutation	SNP	C	C	A	c.G302T	p.R101L	ENST00000589367
P003	SDHA	hg19	chr5	225602	225602	+	Silent	SNP	G	G	C	c.G381C	p.V127V	ENST00000504309
P003	SDHA	hg19	chr5	225632	225632	+	Silent	SNP	T	T	C	c.T411C	p.D137D	ENST00000504309
P003	SDHA	hg19	chr5	225623	225623	+	Silent	SNP	G	G	T	c.G402T	p.G134G	ENST00000504309
P003	PPP2R3A	hg19	chr3	135825122	135825122	+	Missense_Mutation	SNP	C	C	T	c.C3287T	p.T1096M	ENST00000264977
P003	MAP3K13	hg19	chr3	185190872	185190872	+	Nonsense_Mutation	SNP	C	C	T	c.C1753T	p.R585X	ENST00000424227
P003	CLASP1	hg19	chr2	122106279	122106279	+	Missense_Mutation	SNP	C	C	T	c.G4090A	p.E1364K	ENST00000455322
P003	NUAK1	hg19	chr12	106461032	106461032	+	Missense_Mutation	SNP	C	C	T	c.G1534A	p.V512I	ENST00000261402
P003	SLC24A1	hg19	chr15	65943127	65943127	+	Silent	SNP	A	A	G	c.A2586G	p.E862E	ENST00000537259
P003	SLC24A1	hg19	chr15	65943148	65943148	+	Silent	SNP	A	A	G	c.A2607G	p.E869E	ENST00000537259
P003	ARHGEF10L	hg19	chr1	17945890	17945890	+	Missense_Mutation	SNP	C	C	T	c.C892T	p.P298S	ENST00000434513
P003	ARHGEF10L	hg19	chr1	17958845	17958845	+	Silent	SNP	C	C	A	c.C1614A	p.L538L	ENST00000434513
P003	ARHGEF10L	hg19	chr1	17945012	17945012	+	Intron	SNP	G	G	T	c.G164T	p.C55F	ENST00000375408
P003	GTSE1	hg19	chr22	46725989	46725989	+	Missense_Mutation	SNP	G	G	T	c.G2182T	p.D728Y	ENST00000454366
P003	GTSE1	hg19	chr22	46726001	46726001	+	Missense_Mutation	SNP	G	G	A	c.G2194A	p.V732M	ENST00000454366
P003	TTC38	hg19	chr22	46669847	46669847	+	Silent	SNP	C	C	T	c.C246T	p.S82S	ENST00000445282
P003	TTC38	hg19	chr22	46668278	46668278	+	Missense_Mutation	SNP	G	G	T	c.G158T	p.C53F	ENST00000445282
P003	CELSR1	hg19	chr22	46930216	46930216	+	Missense_Mutation	SNP	C	C	T	c.G2852A	p.R951H	ENST00000395964
P003	CACNG5	hg19	chr17	64875155	64875155	+	Missense_Mutation	SNP	G	G	A	c.G262A	p.E88K	ENST00000533854
P003	MOCOS	hg19	chr18	33795708	33795708	+	Missense_Mutation	SNP	C	C	T	c.C1565T	p.A522V	ENST00000261326
P003	ATP12A	hg19	chr13	25280588	25280588	+	Missense_Mutation	SNP	G	G	A	c.G2156A	p.G719D	ENST00000381946
P003	ATP12A	hg19	chr13	25285475	25285475	+	Missense_Mutation	SNP	G	G	T	c.G3019T	p.A1007S	ENST00000381946
P003	TUBA3D	hg19	chr2	132237681	132237681	+	Missense_Mutation	SNP	C	C	T	c.C415T	p.H139Y	ENST00000321253
P003	FMO4	hg19	chr1	171292314	171292314	+	Missense_Mutation	SNP	A	A	G	c.A304G	p.K102E	ENST00000367749
P003	POTEM	hg19	chr12	109604701	109604701	+	Frame_Shift_Ins	INS	-	-	A	c.690dupA	p.G230fs	ENST00000547722
P003	ACACB	hg19	chr12	109604703	109604703	+	Missense_Mutation	SNP	C	C	G	c.C691G	p.R231G	ENST00000338432
P003	ACACB	hg19	chr12	109616946	109616946	+	Silent	SNP	C	C	T	c.C1491T	p.H497H	ENST00000338432
P003	GPC4	hg19	chrX	132436901	132436901	+	Missense_Mutation	SNP	C	C	A	c.G1455T	p.W485C	ENST00000535467
P003	CAMSAP3	hg19	chr19	7675372	7675372	+	Missense_Mutation	SNP	G	G	T	c.G852T	p.L284F	ENST00000446248
P003	ARHGEF1	hg19	chr19	42406494	42406494	+	Silent	SNP	G	G	T	c.G1653T	p.V551V	ENST00000599846
P003	DGKD	hg19	chr2	234294650	234294650	+	Intron	SNP	C	C	T	c.C60T	p.C20C	ENST00000447484
P003	DGKD	hg19	chr2	234294640	234294640	+	Intron	SNP	C	C	T	c.C50T	p.A17V	ENST00000447484
P003	PAK3	hg19	chrX	110463624	110463624	+	Silent	SNP	G	G	T	c.G1647T	p.L549L	ENST00000519681
P003	APBB1IP	hg19	chr10	26856214	26856216	+	In_Frame_Del	DEL	CCG	CCG	-	c.1798_1800del	p.600_600del	ENST00000376236
P003	FAM76B	hg19	chr11	95516250	95516250	+	Missense_Mutation	SNP	C	C	T	c.G542A	p.R181H	ENST00000543641
P003	TYR	hg19	chr11	88911388	88911388	+	Silent	SNP	C	C	T	c.C267T	p.C89C	ENST00000263321
P003	SLC25A43	hg19	chrX	118540447	118540447	+	Missense_Mutation	SNP	C	C	G	c.C300G	p.D100E	ENST00000336249
P003	SLC25A43	hg19	chrX	118586931	118586956	+	Frame_Shift_Del	DEL	CCCCAGGAGTCGATCAGAGTTTGCAG	CCCCAGGAGTCGATCAGAGTTTGCAG	-	c.929_954del	p.T310fs	ENST00000217909
P003	FBLN1	hg19	chr22	45972924	45972924	+	Silent	SNP	C	C	A	c.C1908A	p.I636I	ENST00000348697
P003	FBLN1	hg19	chr22	45996294	45996294	+	Missense_Mutation	SNP	G	G	A	c.G2080A	p.V694I	ENST00000348697
P003	MCCC1	hg19	chr3	182759476	182759476	+	Silent	SNP	G	G	A	c.C1032T	p.F344F	ENST00000497959
P003	ADCY2	hg19	chr5	7654219	7654219	+	Intron	SNP	G	G	A	c.G90A	p.T30T	ENST00000537121
P003	ITM2A	hg19	chrX	78618954	78618954	+	Missense_Mutation	SNP	C	C	A	c.G209T	p.G70V	ENST00000373298
P003	TNRC6C	hg19	chr17	76047441	76047441	+	Silent	SNP	T	T	C	c.T2298C	p.T766T	ENST00000588847
P003	UBE2D4	hg19	chr7	43988342	43988342	+	RNA	SNP	G	G	T	c.G310T	p.D104Y	ENST00000446008
P003	THOC1	hg19	chr18	226865	226865	+	Nonsense_Mutation	SNP	G	G	A	c.C955T	p.R319X	ENST00000261600
P003	TNS1	hg19	chr2	218683134	218683134	+	Silent	SNP	G	G	A	c.C3609T	p.S1203S	ENST00000171887
P003	RAPGEF3	hg19	chr12	48141527	48141527	+	Missense_Mutation	SNP	G	G	A	c.C1441T	p.H481Y	ENST00000389212
P003	LIPE	hg19	chr19	42907041	42907041	+	Silent	SNP	C	C	T	c.G2685A	p.S895S	ENST00000244289
P003	OPHN1	hg19	chrX	67273563	67273563	+	Missense_Mutation	SNP	G	G	A	c.C2248T	p.R750W	ENST00000355520
P003	EPHA6	hg19	chr3	97278475	97278475	+	Intron	SNP	G	G	A	c.G603A	p.G201G	ENST00000503760
P003	SMARCA2	hg19	chr9	2039779	2039779	+	Silent	SNP	G	G	A	c.G669A	p.Q223Q	ENST00000450198
P003	SESN1	hg19	chr6	109321871	109321871	+	Silent	SNP	C	C	T	c.G552A	p.A184A	ENST00000436639
P003	PSEN1	hg19	chr14	73675553	73675553	+	Intron	SNP	C	C	T	c.C977T	p.A326V	ENST00000344094
P003	PSEN1	hg19	chr14	73675551	73675551	+	Intron	SNP	T	T	C	c.T975C	p.A325A	ENST00000344094
P003	PSEN1	hg19	chr14	73675539	73675539	+	Intron	SNP	T	T	C	c.T963C	p.C321C	ENST00000344094
P003	IGSF9B	hg19	chr11	133790345	133790345	+	Missense_Mutation	SNP	G	G	A	c.C3275T	p.P1092L	ENST00000533871
P003	IGSF9B	hg19	chr11	133799648	133799648	+	Missense_Mutation	SNP	G	G	A	c.C1549T	p.R517W	ENST00000533871
P003	CACNA1S	hg19	chr1	201009103	201009103	+	Silent	SNP	C	C	T	c.G5478A	p.E1826E	ENST00000362061
P003	CACNA1S	hg19	chr1	201079377	201079377	+	Missense_Mutation	SNP	A	A	G	c.T173C	p.L58S	ENST00000367338
P003	ZNF506	hg19	chr19	19905748	19905748	+	Silent	SNP	C	C	T	c.G948A	p.E316E	ENST00000591639
P003	ZNF506	hg19	chr19	19905508	19905508	+	Silent	SNP	C	C	G	c.G1188C	p.P396P	ENST00000591639
P003	KIAA0141	hg19	chr5	141313807	141313807	+	Silent	SNP	G	G	A	c.G900A	p.A300A	ENST00000432126
P003	KCNK2	hg19	chr1	215408191	215408191	+	Silent	SNP	C	C	T	c.C984T	p.H328H	ENST00000444842
P003	GEMIN5	hg19	chr5	154284925	154284925	+	Missense_Mutation	SNP	G	G	A	c.C2507T	p.P836L	ENST00000285873
P003	DOPEY1	hg19	chr6	83866970	83866970	+	Missense_Mutation	SNP	G	G	T	c.G6674T	p.R2225I	ENST00000349129
P003	KAT6A	hg19	chr8	41790653	41790653	+	Silent	SNP	A	A	G	c.T5085C	p.P1695P	ENST00000406337
P003	GRHL2	hg19	chr8	102643883	102643883	+	Nonsense_Mutation	SNP	C	C	T	c.C1228T	p.R410X	ENST00000395927
P003	NUFIP1	hg19	chr13	45523888	45523888	+	Silent	SNP	G	G	T	c.C1107A	p.G369G	ENST00000379161
P003	APLP2	hg19	chr11	130011833	130011833	+	Missense_Mutation	SNP	G	G	A	c.G2054A	p.R685Q	ENST00000263574
P003	EFR3B	hg19	chr2	25354683	25354683	+	Silent	SNP	G	G	A	c.G1050A	p.A350A	ENST00000403714
P003	CD59	hg19	chr11	33732991	33732991	+	Intron	SNP	A	A	G	c.T230C	p.L77P	ENST00000533403
P003	PDCD6IP	hg19	chr11	33732961	33732961	+	Intron	INS	-	-	CACC	c.259_260insGGTG	p.S87fs	ENST00000430877
P003	CD59	hg19	chr11	33732958	33732960	+	Intron	DEL	TGT	TGT	-	c.261_263del	p.87_88del	ENST00000533403
P003	CD82	hg19	chr11	44640633	44640633	+	Missense_Mutation	SNP	G	G	A	c.G761A	p.R254Q	ENST00000227155
P003	CD82	hg19	chr11	44609065	44609065	+	5'UTR	SNP	C	C	A	c.C131A	p.A44E	ENST00000527737
P003	MECOM	hg19	chr3	169283762	169283762	+	Intron	SNP	T	T	A	c.A104T	p.Q35L	ENST00000486748
P003	CTTN	hg19	chr11	70281132	70281132	+	Missense_Mutation	SNP	C	C	T	c.C1517T	p.A506V	ENST00000301843
P003	MAST2	hg19	chr1	46501478	46501478	+	Missense_Mutation	SNP	C	C	A	c.C4567A	p.L1523M	ENST00000372009
P003	HBQ1	hg19	chr16	230859	230859	+	Missense_Mutation	SNP	C	C	A	c.C290A	p.A97D	ENST00000199708
P003	FAT2	hg19	chr5	150901609	150901609	+	Silent	SNP	C	C	T	c.G10545A	p.T3515T	ENST00000261800
P003	HUWE1	hg19	chrX	53579642	53579642	+	Missense_Mutation	SNP	T	T	A	c.A8707T	p.R2903W	ENST00000262854
P003	HUWE1	hg19	chrX	53586351	53586351	+	Missense_Mutation	SNP	A	A	G	c.T7879C	p.F2627L	ENST00000262854
P003	MYBPC2	hg19	chr19	50957375	50957375	+	Silent	SNP	C	C	T	c.C1848T	p.Y616Y	ENST00000357701
P003	MYBPC2	hg19	chr19	50944180	50944180	+	Missense_Mutation	SNP	G	G	A	c.G616A	p.D206N	ENST00000357701
P003	MYBPC2	hg19	chr19	50965184	50965184	+	Missense_Mutation	SNP	A	A	T	c.A3119T	p.K1040M	ENST00000357701
P003	NLK	hg19	chr17	26370045	26370045	+	Missense_Mutation	SNP	C	C	A	c.C146A	p.P49H	ENST00000582037
P003	ADAMTS2	hg19	chr5	178578171	178578171	+	Missense_Mutation	SNP	A	A	T	c.T1660A	p.Y554N	ENST00000274609
P003	ADAMTS2	hg19	chr5	178578187	178578187	+	Silent	SNP	C	C	T	c.G1644A	p.A548A	ENST00000274609
P003	ADAMTS2	hg19	chr5	178578144	178578144	+	Missense_Mutation	SNP	T	T	C	c.A1687G	p.R563G	ENST00000274609
P003	ADAMTS2	hg19	chr5	178578178	178578178	+	Silent	SNP	A	A	G	c.T1653C	p.H551H	ENST00000274609
P003	ADAMTS2	hg19	chr5	178578190	178578190	+	Silent	SNP	G	G	A	c.C1641T	p.G547G	ENST00000274609
P003	ADAMTS2	hg19	chr5	178578135	178578135	+	Missense_Mutation	SNP	C	C	T	c.G1696A	p.A566T	ENST00000274609
P003	ADAMTS2	hg19	chr5	178578149	178578149	+	Missense_Mutation	SNP	T	T	C	c.A1682G	p.Q561R	ENST00000274609
P003	ADAMTS2	hg19	chr5	178578145	178578145	+	Silent	SNP	A	A	G	c.T1686C	p.G562G	ENST00000274609
P003	PGS1	hg19	chr17	76400008	76400008	+	Missense_Mutation	SNP	G	G	A	c.G1240A	p.E414K	ENST00000262764
P003	PGS1	hg19	chr17	76399995	76399995	+	Silent	SNP	G	G	A	c.G1227A	p.L409L	ENST00000262764
P003	SF3B2	hg19	chr11	65822615	65822615	+	Silent	SNP	A	A	C	c.A327C	p.P109P	ENST00000533595
P003	METTL2A	hg19	chr17	60503924	60503924	+	Missense_Mutation	SNP	C	C	A	c.C467A	p.P156H	ENST00000311506
P003	GP6	hg19	chr19	55525616	55525616	+	Missense_Mutation	SNP	G	G	C	c.C1697G	p.S566C	ENST00000310373
P003	GP6	hg19	chr19	55525697	55525697	+	Missense_Mutation	SNP	A	A	G	c.T1616C	p.I539T	ENST00000310373
P003	GP6	hg19	chr19	55543517	55543517	+	Silent	SNP	G	G	A	c.C315T	p.L105L	ENST00000417454
P003	ASAP3	hg19	chr1	23757615	23757615	+	Silent	SNP	G	G	A	c.C2550T	p.S850S	ENST00000336689
P003	DOCK9	hg19	chr13	99452560	99452560	+	Missense_Mutation	SNP	C	C	A	c.G5940T	p.Q1980H	ENST00000376460
P003	ARHGAP28	hg19	chr18	6898507	6898507	+	Intron	SNP	G	G	A	c.G2103A	p.S701S	ENST00000400091
P003	ATRN	hg19	chr20	3565404	3565404	+	Missense_Mutation	SNP	T	T	A	c.T3061A	p.Y1021N	ENST00000446916
P003	ZNF343	hg19	chr20	2472688	2472688	+	Missense_Mutation	SNP	T	T	C	c.A347G	p.H116R	ENST00000358413
P003	ZNF343	hg19	chr20	2472699	2472699	+	Missense_Mutation	SNP	T	T	C	c.A336G	p.I112M	ENST00000358413
P003	ZNF343	hg19	chr20	2472687	2472687	+	Silent	SNP	A	A	G	c.T348C	p.H116H	ENST00000358413
P003	ZNF343	hg19	chr20	2472692	2472692	+	Missense_Mutation	SNP	A	A	G	c.T343C	p.S115P	ENST00000358413
P003	ZNF343	hg19	chr20	2472720	2472720	+	Silent	SNP	G	G	A	c.C315T	p.I105I	ENST00000358413
P003	ZNF343	hg19	chr20	2472712	2472712	+	Missense_Mutation	SNP	A	A	C	c.T323G	p.I108S	ENST00000358413
P003	ZNF343	hg19	chr20	2472689	2472689	+	Missense_Mutation	SNP	G	G	A	c.C346T	p.H116Y	ENST00000358413
P003	RPL6	hg19	chr12	112846125	112846127	+	In_Frame_Del	DEL	CTT	CTT	-	c.253_255del	p.85_85del	ENST00000551291
P003	SLC23A2	hg19	chr20	4864294	4864294	+	Missense_Mutation	SNP	G	G	T	c.C818A	p.A273D	ENST00000379333
P003	GCN1L1	hg19	chr12	120602289	120602289	+	Missense_Mutation	SNP	G	G	A	c.C1699T	p.R567W	ENST00000300648
P003	KCNH4	hg19	chr17	40323960	40323960	+	Silent	SNP	C	C	T	c.G1041A	p.L347L	ENST00000607371
P003	KCNH4	hg19	chr17	40315676	40315676	+	Nonsense_Mutation	SNP	G	G	A	c.C2425T	p.Q809X	ENST00000607371
P003	KCNH4	hg19	chr17	40315747	40315747	+	Missense_Mutation	SNP	G	G	A	c.C2354T	p.A785V	ENST00000607371
P003	GANAB	hg19	chr11	62406579	62406579	+	Silent	SNP	A	A	G	c.T256C	p.L86L	ENST00000356638
P003	BIRC5	hg19	chr17	76212078	76212078	+	Missense_Mutation	SNP	A	A	C	c.A253C	p.T85P	ENST00000301633
P003	BIRC5	hg19	chr17	76212106	76212106	+	Missense_Mutation	SNP	G	G	A	c.G281A	p.R94Q	ENST00000301633
P003	BIRC5	hg19	chr17	76212057	76212057	+	Missense_Mutation	SNP	A	A	G	c.A232G	p.T78A	ENST00000301633
P003	BIRC5	hg19	chr17	76212059	76212059	+	Silent	SNP	G	G	A	c.G234A	p.T78T	ENST00000301633
P003	BIRC5	hg19	chr17	76212069	76212069	+	Missense_Mutation	SNP	G	G	A	c.G244A	p.A82T	ENST00000301633
P003	BIRC5	hg19	chr17	76212066	76212066	+	Missense_Mutation	SNP	T	T	C	c.T241C	p.Y81H	ENST00000301633
P003	BIRC5	hg19	chr17	76212096	76212096	+	Nonsense_Mutation	SNP	C	C	T	c.C271T	p.R91X	ENST00000301633
P003	ARHGAP4	hg19	chrX	153185087	153185087	+	Nonsense_Mutation	SNP	C	C	T	c.G735A	p.W245X	ENST00000370028
P003	SLC9A1	hg19	chr1	27427701	27427701	+	Silent	SNP	G	G	A	c.C2103T	p.I701I	ENST00000263980
P003	NUDC	hg19	chr1	27272083	27272083	+	Missense_Mutation	SNP	C	C	T	c.C850T	p.R284C	ENST00000321265
P003	MAEA	hg19	chr4	1316280	1316280	+	Missense_Mutation	SNP	C	C	T	c.C565T	p.R189W	ENST00000510794
P003	LEPREL1	hg19	chr3	189838364	189838364	+	Missense_Mutation	SNP	C	C	A	c.G157T	p.A53S	ENST00000319332
P003	CHRD	hg19	chr3	184105771	184105771	+	Missense_Mutation	SNP	G	G	T	c.G2504T	p.C835F	ENST00000450923
P003	CHRD	hg19	chr3	184100538	184100538	+	Missense_Mutation	SNP	G	G	T	c.G958T	p.G320W	ENST00000450923
P003	CHRD	hg19	chr3	184100697	184100697	+	Nonsense_Mutation	SNP	C	C	T	c.C1036T	p.R346X	ENST00000450923
P003	CHRD	hg19	chr3	184105731	184105731	+	Nonsense_Mutation	SNP	G	G	T	c.G2464T	p.E822X	ENST00000450923
P003	FLT3LG	hg19	chr19	49982262	49982262	+	Missense_Mutation	SNP	C	C	T	c.C439T	p.R147C	ENST00000600429
P003	GOLGA3	hg19	chr12	133365862	133365862	+	Silent	SNP	G	G	T	c.C2562A	p.A854A	ENST00000545875
P003	PABPC4	hg19	chr1	40030977	40030977	+	Missense_Mutation	SNP	G	G	A	c.C1046T	p.A349V	ENST00000372862
P003	EFNB1	hg19	chrX	68058584	68058584	+	Missense_Mutation	SNP	C	C	A	c.C253A	p.Q85K	ENST00000204961
P003	EFNB1	hg19	chrX	68059593	68059593	+	Missense_Mutation	SNP	G	G	T	c.G493T	p.G165W	ENST00000204961
P003	PDPR	hg19	chr16	70190684	70190684	+	Missense_Mutation	SNP	C	C	T	c.C2542T	p.R848C	ENST00000568530
P003	KIF4A	hg19	chrX	69550108	69550108	+	Missense_Mutation	SNP	G	G	A	c.G997A	p.A333T	ENST00000374403
P003	FCGBP	hg19	chr19	40419597	40419597	+	Missense_Mutation	SNP	G	G	A	c.C3397T	p.P1133S	ENST00000221347
P003	PUS7	hg19	chr7	105111271	105111271	+	Missense_Mutation	SNP	C	C	A	c.G1262T	p.C421F	ENST00000481939
P003	LAMB4	hg19	chr7	107743529	107743529	+	Silent	SNP	C	C	T	c.G1140A	p.R380R	ENST00000418464
P003	LAMB4	hg19	chr7	107716203	107716203	+	Intron	SNP	G	G	A	c.C2299T	p.Q767X	ENST00000418464
P003	LAMB4	hg19	chr7	107716202	107716202	+	Intron	SNP	T	T	C	c.A2300G	p.Q767R	ENST00000418464
P003	WDR7	hg19	chr18	54363505	54363505	+	Missense_Mutation	SNP	C	C	T	c.C1390T	p.R464W	ENST00000357574
P003	MYO15A	hg19	chr17	18077229	18077229	+	Silent	SNP	G	G	C	c.G10485C	p.L3495L	ENST00000205890
P003	MYO15A	hg19	chr17	18047189	18047189	+	Missense_Mutation	SNP	G	G	A	c.G6052A	p.G2018R	ENST00000205890
P003	NLRP1	hg19	chr17	5418347	5418347	+	Missense_Mutation	SNP	G	G	C	c.C4149G	p.D1383E	ENST00000572272
P003	PITPNM3	hg19	chr17	6367543	6367543	+	Silent	SNP	C	C	A	c.G2103T	p.V701V	ENST00000262483
P003	ZFHX4	hg19	chr8	77617508	77617508	+	Silent	SNP	G	G	T	c.G1185T	p.P395P	ENST00000521891
P003	ZC3HC1	hg19	chr7	129679176	129679176	+	Intron	SNP	C	C	G	c.G499C	p.V167L	ENST00000480193
P003	ZC3HC1	hg19	chr7	129664219	129664219	+	Missense_Mutation	SNP	T	T	C	c.A841G	p.S281G	ENST00000311873
P003	TMEM101	hg19	chr17	42092316	42092316	+	Missense_Mutation	SNP	G	G	A	c.C5T	p.A2V	ENST00000589334
P003	TMEM67	hg19	chr14	24040435	24040435	+	Frame_Shift_Ins	INS	-	-	C	c.1504dupG	p.A502fs	ENST00000409623
P003	RPGRIP1	hg19	chr14	21769276	21769276	+	Missense_Mutation	SNP	C	C	A	c.C370A	p.L124M	ENST00000557771
P003	CAPN3	hg19	chr15	42684879	42684879	+	Missense_Mutation	SNP	C	C	A	c.C727A	p.L243M	ENST00000356316
P003	CAPN3	hg19	chr15	42689049	42689049	+	Silent	SNP	C	C	T	c.C906T	p.H302H	ENST00000356316
P003	PHGDH	hg19	chr1	120278051	120278051	+	Silent	SNP	G	G	A	c.G777A	p.L259L	ENST00000369409
P003	TEKT2	hg19	chr1	36552338	36552338	+	Silent	SNP	C	C	T	c.C522T	p.S174S	ENST00000207457
P003	RFFL	hg19	chr17	33344587	33344587	+	Silent	SNP	G	G	C	c.C630G	p.V210V	ENST00000447669
P003	RAD51L3-RFFL	hg19	chr17	33353559	33353559	+	Missense_Mutation	SNP	C	C	T	c.G568A	p.A190T	ENST00000592181
P003	CDC45	hg19	chr22	19492948	19492948	+	Silent	SNP	C	C	T	c.C864T	p.N288N	ENST00000437685
P003	CDC45	hg19	chr22	19492894	19492894	+	Silent	SNP	C	C	T	c.C810T	p.Y270Y	ENST00000437685
P003	UPRT	hg19	chrX	74494453	74494453	+	Silent	SNP	C	C	T	c.C364T	p.L122L	ENST00000462237
P003	DHPS	hg19	chr19	12791921	12791921	+	Missense_Mutation	SNP	T	T	C	c.A7G	p.I3V	ENST00000594424
P003	DHPS	hg19	chr19	12791909	12791909	+	Missense_Mutation	SNP	A	A	G	c.T19C	p.F7L	ENST00000594424
P003	DHPS	hg19	chr19	12791901	12791901	+	Silent	SNP	T	T	C	c.A27G	p.E9E	ENST00000594424
P003	ARCN1	hg19	chr11	118452021	118452021	+	Missense_Mutation	SNP	G	G	T	c.G187T	p.V63L	ENST00000359415
P003	SEMA4G	hg19	chr10	102732914	102732914	+	Silent	SNP	C	C	T	c.C153T	p.G51G	ENST00000521006
P003	TREM2	hg19	chr6	41129309	41129309	+	Missense_Mutation	SNP	G	G	A	c.C83T	p.A28V	ENST00000373122
P003	NCR2	hg19	chr6	41310681	41310681	+	Missense_Mutation	SNP	C	C	T	c.C706T	p.H236Y	ENST00000373086
P003	HSP90AB1	hg19	chr6	44221299	44221299	+	Silent	SNP	C	C	T	c.C2139T	p.G713G	ENST00000371646
P003	HSP90AB1	hg19	chr6	44221293	44221293	+	Silent	SNP	C	C	T	c.C2133T	p.L711L	ENST00000371646
P003	PCSK5	hg19	chr9	78790151	78790151	+	Intron	SNP	T	T	C	c.T2006C	p.M669T	ENST00000376767
P003	PCSK5	hg19	chr9	78790138	78790138	+	Intron	SNP	A	A	G	c.A1993G	p.K665E	ENST00000376767
P003	NRP1	hg19	chr10	33475258	33475258	+	Missense_Mutation	SNP	G	G	A	c.C2221T	p.R741C	ENST00000265371
P003	CATSPERG	hg19	chr19	38828428	38828428	+	Intron	SNP	G	G	A	c.G373A	p.G125S	ENST00000471517
P003	CATSPERG	hg19	chr19	38828389	38828389	+	Intron	SNP	T	T	C	c.T334C	p.C112R	ENST00000471517
P003	CATSPERG	hg19	chr19	38828397	38828397	+	Intron	SNP	T	T	C	c.T342C	p.V114V	ENST00000471517
P003	CATSPERG	hg19	chr19	38828404	38828404	+	Intron	SNP	A	A	G	c.A349G	p.T117A	ENST00000471517
P003	CATSPERG	hg19	chr19	38828444	38828444	+	Intron	SNP	C	C	T	c.C389T	p.P130L	ENST00000471517
P003	CATSPERG	hg19	chr19	38828392	38828392	+	Intron	SNP	G	G	T	c.G337T	p.A113S	ENST00000471517
P003	MED15	hg19	chr22	20937639	20937639	+	Missense_Mutation	SNP	G	G	T	c.G1695T	p.K565N	ENST00000263205
P003	MED15	hg19	chr22	20922814	20922814	+	Missense_Mutation	SNP	G	G	A	c.G970A	p.A324T	ENST00000541476
P003	SNAP29	hg19	chr22	21235389	21235389	+	Missense_Mutation	SNP	A	A	G	c.A208G	p.S70G	ENST00000439214
P003	LZTR1	hg19	chr22	21347974	21347974	+	Silent	SNP	G	G	T	c.G1284T	p.T428T	ENST00000215739
P003	MMP11	hg19	chr22	24122672	24122672	+	Silent	SNP	C	C	T	c.C417T	p.I139I	ENST00000437086
P003	CECR2	hg19	chr22	18028770	18028770	+	Missense_Mutation	SNP	G	G	A	c.G3301A	p.V1101M	ENST00000400585
P003	P2RX6	hg19	chr22	21380547	21380547	+	Frame_Shift_Del	DEL	T	T	-	c.898delT	p.F300fs	ENST00000443995
P003	CABIN1	hg19	chr22	24567937	24567937	+	Missense_Mutation	SNP	C	C	T	c.C6014T	p.T2005I	ENST00000398319
P003	CABIN1	hg19	chr22	24567800	24567800	+	Silent	SNP	C	C	A	c.C5877A	p.P1959P	ENST00000398319
P003	CABIN1	hg19	chr22	24563238	24563238	+	Missense_Mutation	SNP	G	G	A	c.G5639A	p.R1880H	ENST00000398319
P003	TBC1D10A	hg19	chr22	30688383	30688383	+	Missense_Mutation	SNP	C	C	A	c.G1529T	p.S510I	ENST00000403477
P003	SF3A1	hg19	chr22	30752759	30752759	+	Missense_Mutation	SNP	G	G	A	c.C23T	p.A8V	ENST00000447376
P003	GGT5	hg19	chr22	24628080	24628080	+	Silent	SNP	G	G	A	c.C693T	p.G231G	ENST00000398292
P003	SPECC1L	hg19	chr22	24810544	24810544	+	Missense_Mutation	SNP	A	A	G	c.A3307G	p.N1103D	ENST00000314328
P003	SNRPD3	hg19	chr22	24964059	24964059	+	Missense_Mutation	SNP	G	G	T	c.G234T	p.K78N	ENST00000404603
P003	PES1	hg19	chr22	30977347	30977347	+	Missense_Mutation	SNP	C	C	A	c.G379T	p.A127S	ENST00000405677
P003	MAPK1	hg19	chr22	22221709	22221714	+	In_Frame_Del	DEL	CCGCCG	CCGCCG	-	c.17_22del	p.6_8del	ENST00000544786
P003	SLC35E4	hg19	chr22	31042631	31042631	+	Nonsense_Mutation	SNP	C	C	A	c.C666A	p.Y222X	ENST00000343605
P003	CYTH4	hg19	chr22	37699332	37699332	+	Frame_Shift_Del	DEL	C	C	-	c.585delC	p.L195fs	ENST00000248901
P003	DGCR14	hg19	chr22	19126770	19126770	+	Missense_Mutation	SNP	G	G	A	c.C724T	p.R242W	ENST00000434568
P003	CARD10	hg19	chr22	37892518	37892518	+	Missense_Mutation	SNP	G	G	T	c.C1997A	p.A666D	ENST00000403299
P003	HIRA	hg19	chr22	19381914	19381914	+	Missense_Mutation	SNP	C	C	A	c.G641T	p.W214L	ENST00000546308
P003	SH3BP1	hg19	chr22	38046214	38046214	+	Missense_Mutation	SNP	G	G	T	c.G1372T	p.V458F	ENST00000357436
P003	SH3BP1	hg19	chr22	38061727	38061727	+	Missense_Mutation	SNP	G	G	T	c.G1667T	p.G556V	ENST00000599616
P003	SEZ6L	hg19	chr22	26709810	26709810	+	Missense_Mutation	SNP	G	G	T	c.G1957T	p.D653Y	ENST00000529632
P003	LGALS1	hg19	chr22	38075698	38075698	+	Missense_Mutation	SNP	C	C	A	c.C350A	p.A117D	ENST00000215909
P003	PIK3IP1	hg19	chr22	31685488	31685488	+	Missense_Mutation	SNP	G	G	T	c.C505A	p.L169M	ENST00000441972
P003	PIK3IP1	hg19	chr22	31685637	31685637	+	Missense_Mutation	SNP	G	G	A	c.C424T	p.R142C	ENST00000443175
P003	PATZ1	hg19	chr22	31723140	31723140	+	Missense_Mutation	SNP	C	C	T	c.G1801A	p.G601R	ENST00000266269
P003	TRIOBP	hg19	chr22	38109353	38109353	+	Missense_Mutation	SNP	G	G	A	c.G391A	p.G131S	ENST00000406386
P003	TRIOBP	hg19	chr22	38153973	38153973	+	Missense_Mutation	SNP	T	T	C	c.T6041C	p.L2014P	ENST00000406386
P003	TFIP11	hg19	chr22	26895304	26895304	+	Silent	SNP	G	G	A	c.C1095T	p.H365H	ENST00000405938
P003	TFIP11	hg19	chr22	26895451	26895451	+	Silent	SNP	C	C	T	c.G948A	p.A316A	ENST00000405938
P003	GCAT	hg19	chr22	38211166	38211166	+	Missense_Mutation	SNP	G	G	T	c.G688T	p.A230S	ENST00000323205
P003	ANKRD54	hg19	chr22	38229100	38229100	+	Intron	SNP	C	C	A	c.G598T	p.G200C	ENST00000434930
P003	EIF3L	hg19	chr22	38271941	38271941	+	Missense_Mutation	SNP	C	C	T	c.C1000T	p.R334W	ENST00000412331
P003	MICALL1	hg19	chr22	38313757	38313757	+	Silent	SNP	G	G	A	c.G129A	p.P43P	ENST00000445494
P003	MICALL1	hg19	chr22	38302574	38302574	+	Silent	SNP	C	C	T	c.C145T	p.L49L	ENST00000215957
P003	DEPDC5	hg19	chr22	32293491	32293491	+	Silent	SNP	C	C	A	c.C4227A	p.A1409A	ENST00000400246
P003	DEPDC5	hg19	chr22	32218753	32218753	+	Missense_Mutation	SNP	G	G	A	c.G2081A	p.G694D	ENST00000400249
P003	PICK1	hg19	chr22	38464107	38464107	+	Intron	SNP	G	G	A	c.G378A	p.G126G	ENST00000437453
P003	TTC28	hg19	chr22	28692281	28692281	+	Missense_Mutation	SNP	G	G	T	c.C838A	p.L280M	ENST00000397906
P003	SLC5A1	hg19	chr22	32462940	32462940	+	Missense_Mutation	SNP	G	G	T	c.G226T	p.A76S	ENST00000266088
P003	SLC5A4	hg19	chr22	32614594	32614594	+	Silent	SNP	G	G	A	c.C1887T	p.D629D	ENST00000266086
P003	SLC5A4	hg19	chr22	32643415	32643415	+	Missense_Mutation	SNP	C	C	A	c.G460T	p.V154L	ENST00000266086
P003	RTDR1	hg19	chr22	23466628	23466628	+	3'UTR	SNP	C	C	T	c.G109A	p.A37T	ENST00000421213
P003	RTCB	hg19	chr22	32784007	32784007	+	Missense_Mutation	SNP	A	A	T	c.T1490A	p.L497Q	ENST00000216038
P003	RTCB	hg19	chr22	32784003	32784003	+	Missense_Mutation	SNP	T	T	G	c.A1494C	p.R498S	ENST00000216038
P003	FBXO7	hg19	chr22	32875001	32875001	+	Nonsense_Mutation	SNP	C	C	A	c.C156A	p.Y52X	ENST00000266087
P003	RAB36	hg19	chr22	23492255	23492255	+	Silent	SNP	C	C	T	c.C273T	p.Y91Y	ENST00000341989
P003	PPP6R2	hg19	chr22	50860808	50860808	+	Missense_Mutation	SNP	A	A	G	c.A971G	p.K324R	ENST00000216061
P003	PPP6R2	hg19	chr22	50857824	50857824	+	Missense_Mutation	SNP	C	C	T	c.C778T	p.R260W	ENST00000216061
P003	PPP6R2	hg19	chr22	50879450	50879450	+	Silent	SNP	C	C	T	c.C2595T	p.V865V	ENST00000216061
P003	SBF1	hg19	chr22	50893976	50893976	+	Silent	SNP	C	C	A	c.G4302T	p.V1434V	ENST00000380817
P003	SBF1	hg19	chr22	50903734	50903734	+	Missense_Mutation	SNP	G	G	T	c.C1113A	p.F371L	ENST00000390679
P003	SBF1	hg19	chr22	50906056	50906056	+	Missense_Mutation	SNP	G	G	T	c.C343A	p.H115N	ENST00000390679
P003	SUN2	hg19	chr22	39136280	39136280	+	Missense_Mutation	SNP	G	G	A	c.C1348T	p.R450W	ENST00000406622
P003	SUN2	hg19	chr22	39148566	39148566	+	Missense_Mutation	SNP	C	C	A	c.G68T	p.G23V	ENST00000452294
P003	CYB5R3	hg19	chr22	43032744	43032744	+	Missense_Mutation	SNP	G	G	T	c.C61A	p.P21T	ENST00000402438
P003	CYB5R3	hg19	chr22	43032835	43032835	+	Silent	SNP	G	G	T	c.C138A	p.L46L	ENST00000361740
P003	PACSIN2	hg19	chr22	43287137	43287137	+	Missense_Mutation	SNP	G	G	T	c.C269A	p.A90E	ENST00000453643
P003	TTLL1	hg19	chr22	43459882	43459882	+	Silent	SNP	C	C	T	c.G684A	p.P228P	ENST00000331018
P003	AP1B1	hg19	chr22	29745284	29745284	+	Missense_Mutation	SNP	C	C	T	c.G1360A	p.E454K	ENST00000432560
P003	TOM1	hg19	chr22	35730348	35730348	+	Missense_Mutation	SNP	G	G	A	c.G1055A	p.G352D	ENST00000449058
P003	TOM1	hg19	chr22	35729449	35729449	+	Missense_Mutation	SNP	C	C	T	c.C968T	p.P323L	ENST00000456128
P003	NEFH	hg19	chr22	29881776	29881776	+	Missense_Mutation	SNP	G	G	A	c.G1148A	p.R383Q	ENST00000310624
P003	HMOX1	hg19	chr22	35782856	35782856	+	Missense_Mutation	SNP	C	C	A	c.C323A	p.T108K	ENST00000412893
P003	THOC5	hg19	chr22	29924442	29924442	+	Missense_Mutation	SNP	G	G	T	c.C972A	p.D324E	ENST00000442555
P003	ARSA	hg19	chr22	51066199	51066199	+	Missense_Mutation	SNP	C	C	G	c.G3C	p.M1I	ENST00000547805
P003	TTLL12	hg19	chr22	43569829	43569829	+	Silent	SNP	G	G	A	c.C1233T	p.G411G	ENST00000216129
P003	RPL3	hg19	chr22	39710139	39710139	+	Missense_Mutation	SNP	G	G	T	c.C768A	p.D256E	ENST00000402527
P003	TAB1	hg19	chr22	39811635	39811635	+	Missense_Mutation	SNP	G	G	A	c.G301A	p.D101N	ENST00000331454
P003	APOL4	hg19	chr22	36587468	36587468	+	Silent	SNP	G	G	A	c.C699T	p.D233D	ENST00000332987
P003	MYH9	hg19	chr22	36691002	36691002	+	Silent	SNP	C	C	G	c.G3606C	p.A1202A	ENST00000216181
P003	MYH9	hg19	chr22	36685336	36685336	+	Missense_Mutation	SNP	G	G	T	c.C4352A	p.A1451E	ENST00000216181
P003	MYH9	hg19	chr22	36684901	36684901	+	Missense_Mutation	SNP	G	G	T	c.C4642A	p.L1548M	ENST00000216181
P003	GOLGA6L2	hg19	chr22	36684984	36684984	+	Frame_Shift_Ins	INS	-	-	C	c.4558dupG	p.V1520fs	ENST00000567107
P003	CACNA1I	hg19	chr22	40042709	40042709	+	Missense_Mutation	SNP	G	G	A	c.G1285A	p.A429T	ENST00000400164
P003	GRAP2	hg19	chr22	40364201	40364201	+	Silent	SNP	G	G	A	c.G615A	p.P205P	ENST00000344138
P003	EIF3D	hg19	chr22	36907689	36907689	+	Silent	SNP	G	G	A	c.C1494T	p.C498C	ENST00000405442
P003	TNRC6B	hg19	chr22	40662156	40662156	+	Missense_Mutation	SNP	G	G	A	c.G1922A	p.R641K	ENST00000454349
P003	TNRC6B	hg19	chr22	40717139	40717139	+	Silent	SNP	C	C	T	c.C2608T	p.L870L	ENST00000402203
P003	SGSM3	hg19	chr22	40800662	40800662	+	Silent	SNP	C	C	A	c.C468A	p.A156A	ENST00000248929
P003	SGSM3	hg19	chr22	40804317	40804317	+	Missense_Mutation	SNP	G	G	C	c.G1666C	p.V556L	ENST00000248929
P003	SGSM3	hg19	chr22	40804297	40804297	+	Missense_Mutation	SNP	A	A	G	c.A1646G	p.D549G	ENST00000248929
P003	NCF4	hg19	chr22	37273859	37273859	+	Missense_Mutation	SNP	G	G	T	c.G1014T	p.M338I	ENST00000248899
P003	KCTD17	hg19	chr22	37448603	37448603	+	Intron	SNP	C	C	A	c.C24A	p.P8P	ENST00000431531
P003	IL2RB	hg19	chr22	37524543	37524543	+	Missense_Mutation	SNP	C	C	T	c.G1249A	p.A417T	ENST00000216223
P003	CHADL	hg19	chr22	41633191	41633191	+	Missense_Mutation	SNP	C	C	A	c.G1885T	p.G629C	ENST00000216241
P003	ZC3H7B	hg19	chr22	41735935	41735935	+	Missense_Mutation	SNP	C	C	T	c.C932T	p.P311L	ENST00000352645
P003	ZC3H7B	hg19	chr22	41745174	41745174	+	Missense_Mutation	SNP	G	G	A	c.G1817A	p.R606H	ENST00000352645
P003	ACO2	hg19	chr22	41922457	41922457	+	Missense_Mutation	SNP	G	G	T	c.G2028T	p.K676N	ENST00000396512
P003	ACO2	hg19	chr22	41921267	41921267	+	Missense_Mutation	SNP	G	G	T	c.G1751T	p.S584I	ENST00000396512
P003	ACO2	hg19	chr22	41923325	41923325	+	Missense_Mutation	SNP	G	G	A	c.G2062A	p.E688K	ENST00000396512
P003	PMM1	hg19	chr22	41973359	41973359	+	Missense_Mutation	SNP	C	C	T	c.G752A	p.R251Q	ENST00000216259
P003	CERK	hg19	chr22	47085979	47085979	+	Missense_Mutation	SNP	C	C	A	c.G1451T	p.C484F	ENST00000216264
P003	CERK	hg19	chr22	47116016	47116016	+	Missense_Mutation	SNP	G	G	T	c.C346A	p.L116M	ENST00000443629
P003	BRD1	hg19	chr22	50216832	50216832	+	Silent	SNP	G	G	A	c.C1134T	p.S378S	ENST00000404760
P003	BRD1	hg19	chr22	50216604	50216604	+	Silent	SNP	C	C	T	c.G1362A	p.P454P	ENST00000404760
P003	ZBED4	hg19	chr22	50277665	50277665	+	Missense_Mutation	SNP	C	C	A	c.C355A	p.P119T	ENST00000216268
P003	ZBED4	hg19	chr22	50280244	50280244	+	Silent	SNP	C	C	T	c.C2934T	p.I978I	ENST00000216268
P003	HDAC10	hg19	chr22	50688856	50688856	+	Silent	SNP	C	C	T	c.G291A	p.P97P	ENST00000454936
P003	TRIM9	hg19	chr14	51452834	51452834	+	Intron	SNP	A	A	T	c.T1620A	p.P540P	ENST00000338969
P003	PIGH	hg19	chr14	68066796	68066796	+	Missense_Mutation	SNP	G	G	T	c.C125A	p.T42N	ENST00000561303
P003	AHSA1	hg19	chr14	77935256	77935256	+	Intron	SNP	A	A	G	c.A118G	p.S40G	ENST00000557476
P003	AHSA1	hg19	chr14	77935294	77935294	+	Intron	SNP	G	G	A	c.G156A	p.P52P	ENST00000557476
P003	AHSA1	hg19	chr14	77935271	77935271	+	Intron	SNP	G	G	A	c.G133A	p.E45K	ENST00000557476
P003	AHSA1	hg19	chr14	77935270	77935270	+	Intron	SNP	G	G	C	c.G132C	p.L44L	ENST00000557476
P003	AHSA1	hg19	chr14	77935285	77935285	+	Intron	SNP	T	T	A	c.T147A	p.S49S	ENST00000557476
P003	AHSA1	hg19	chr14	77935298	77935298	+	Intron	SNP	A	A	G	c.A160G	p.T54A	ENST00000557476
P003	AHSA1	hg19	chr14	77935285	77935286	+	Intron	DEL	TG	TG	-	c.147_148del	p.S49fs	ENST00000557476
P003	AHSA1	hg19	chr14	77935286	77935286	+	Intron	SNP	G	G	A	c.G148A	p.G50S	ENST00000557476
P003	AHSA1	hg19	chr14	77935303	77935303	+	Intron	SNP	A	A	G	c.A165G	p.S55S	ENST00000557476
P003	AHSA1	hg19	chr14	77935308	77935308	+	Intron	SNP	G	G	C	c.G170C	p.C57S	ENST00000557476
P003	AHSA1	hg19	chr14	77935242	77935242	+	Intron	SNP	A	A	G	c.A104G	p.E35G	ENST00000557476
P003	AHSA1	hg19	chr14	77935273	77935273	+	Intron	SNP	A	A	T	c.A135T	p.E45D	ENST00000557476
P003	AHSA1	hg19	chr14	77934954	77934954	+	Intron	SNP	A	A	G	c.A866G	p.X289W	ENST00000535854
P003	RIN3	hg19	chr14	93119233	93119233	+	Silent	SNP	C	C	A	c.C1839A	p.G613G	ENST00000216487
P003	CHGA	hg19	chr14	93398988	93398990	+	In_Frame_Del	DEL	AGG	AGG	-	c.1082_1084del	p.361_362del	ENST00000216492
P003	SERPINA4	hg19	chr14	95030168	95030168	+	Missense_Mutation	SNP	G	G	T	c.G349T	p.V117F	ENST00000557004
P003	DICER1	hg19	chr14	95566251	95566251	+	Missense_Mutation	SNP	G	G	A	c.C4072T	p.R1358C	ENST00000526495
P003	ZC3H14	hg19	chr14	89069404	89069404	+	Missense_Mutation	SNP	G	G	A	c.G1747A	p.A583T	ENST00000251038
P003	YY1	hg19	chr14	100705708	100705710	+	In_Frame_Del	DEL	GAG	GAG	-	c.127_129del	p.43_43del	ENST00000262238
P003	EFS	hg19	chr14	23826575	23826575	+	Missense_Mutation	SNP	G	G	A	c.C1039T	p.R347W	ENST00000429593
P003	SEC23A	hg19	chr14	39562360	39562360	+	Intron	SNP	T	T	C	c.A310G	p.S104G	ENST00000548032
P003	SEC23A	hg19	chr14	39562351	39562351	+	Intron	SNP	A	A	G	c.T319C	p.C107R	ENST00000548032
P003	SEC23A	hg19	chr14	39562362	39562362	+	Intron	SNP	C	C	T	c.G308A	p.R103H	ENST00000548032
P003	SEC23A	hg19	chr14	39562350	39562350	+	Intron	SNP	C	C	T	c.G320A	p.C107Y	ENST00000548032
P003	PROCR	hg19	chr20	33762543	33762543	+	Missense_Mutation	SNP	C	C	T	c.C109T	p.R37C	ENST00000216968
P003	SALL4	hg19	chr20	50405552	50405552	+	Missense_Mutation	SNP	G	G	A	c.C1279T	p.R427C	ENST00000395997
P003	DIDO1	hg19	chr20	61528268	61528268	+	Missense_Mutation	SNP	C	C	T	c.G1669A	p.V557M	ENST00000395343
P003	CSNK2A1	hg19	chr20	459315	459315	+	IGR	SNP	C	C	G	c.G1150C	p.E384Q	ENST00000400227
P003	FERMT1	hg19	chr20	6064731	6064731	+	Silent	SNP	C	C	A	c.G1674T	p.A558A	ENST00000217289
P003	PDYN	hg19	chr20	1963660	1963660	+	Missense_Mutation	SNP	G	G	A	c.C71T	p.S24L	ENST00000540134
P003	BPI	hg19	chr20	36917508	36917508	+	3'Flank	SNP	A	A	G	c.A151G	p.S51G	ENST00000451435
P003	BPI	hg19	chr20	36917510	36917510	+	3'Flank	SNP	T	T	C	c.T153C	p.S51S	ENST00000451435
P003	BPI	hg19	chr20	36917521	36917521	+	3'Flank	SNP	A	A	G	c.A164G	p.H55R	ENST00000451435
P003	BPI	hg19	chr20	36917522	36917522	+	3'Flank	SNP	C	C	T	c.C165T	p.H55H	ENST00000451435
P003	BPI	hg19	chr20	36917526	36917526	+	3'Flank	SNP	A	A	C	c.A169C	p.K57Q	ENST00000451435
P003	AHCY	hg19	chr20	32873314	32873314	+	Missense_Mutation	SNP	T	T	G	c.A1015C	p.M339L	ENST00000538132
P003	METTL4	hg19	chr18	2554991	2554991	+	Missense_Mutation	SNP	C	C	T	c.G65A	p.G22D	ENST00000577166
P003	LPIN2	hg19	chr18	2923798	2923798	+	Missense_Mutation	SNP	C	C	A	c.G2149T	p.A717S	ENST00000261596
P003	MYOM1	hg19	chr18	3215044	3215044	+	Missense_Mutation	SNP	C	C	T	c.G178A	p.A60T	ENST00000400569
P003	CEP192	hg19	chr18	13095644	13095644	+	Missense_Mutation	SNP	C	C	A	c.C6397A	p.L2133I	ENST00000506447
P003	CEP192	hg19	chr18	13049584	13049584	+	Nonsense_Mutation	SNP	G	G	T	c.G2794T	p.E932X	ENST00000506447
P003	LAMA1	hg19	chr18	7024406	7024406	+	Missense_Mutation	SNP	G	G	A	c.C2462T	p.P821L	ENST00000389658
P003	LAMA1	hg19	chr18	6961626	6961626	+	Missense_Mutation	SNP	C	C	T	c.G7585A	p.G2529R	ENST00000389658
P003	STS	hg19	chrX	7243474	7243474	+	Silent	SNP	C	C	T	c.C1191T	p.P397P	ENST00000217961
P003	STS	hg19	chrX	7243507	7243507	+	Silent	SNP	C	C	A	c.C1224A	p.A408A	ENST00000217961
P003	TBL1X	hg19	chrX	9656180	9656182	+	In_Frame_Del	DEL	GCG	GCG	-	c.328_330del	p.110_110del	ENST00000536365
P003	TBL1X	hg19	chrX	9682954	9682954	+	Missense_Mutation	SNP	G	G	T	c.G1465T	p.V489F	ENST00000536365
P003	GPR143	hg19	chrX	9727390	9727390	+	Missense_Mutation	SNP	C	C	T	c.G437A	p.R146Q	ENST00000467482
P003	POLA1	hg19	chrX	24833098	24833098	+	Missense_Mutation	SNP	T	T	C	c.T3299C	p.F1100S	ENST00000379068
P003	MID1	hg19	chrX	10450586	10450586	+	Missense_Mutation	SNP	G	G	A	c.C947T	p.A316V	ENST00000380785
P003	ATP1B4	hg19	chrX	119513472	119513472	+	Missense_Mutation	SNP	C	C	A	c.C1045A	p.L349M	ENST00000361319
P003	ALG13	hg19	chrX	111002994	111002994	+	Missense_Mutation	SNP	C	C	A	c.C3181A	p.P1061T	ENST00000394780
P003	WDR13	hg19	chrX	48462708	48462708	+	Silent	SNP	C	C	T	c.C1203T	p.I401I	ENST00000376729
P003	SRPX	hg19	chrX	38019391	38019391	+	Silent	SNP	G	G	A	c.C834T	p.D278D	ENST00000538295
P003	XIAP	hg19	chrX	123019534	123019534	+	Nonsense_Mutation	SNP	G	G	T	c.G22T	p.G8X	ENST00000422098
P003	ABCD1	hg19	chrX	153005577	153005577	+	Missense_Mutation	SNP	G	G	T	c.G1520T	p.G507V	ENST00000218104
P003	CCDC22	hg19	chrX	49105332	49105332	+	Missense_Mutation	SNP	C	C	T	c.C1486T	p.R496C	ENST00000376227
P003	CCDC22	hg19	chrX	49093644	49093644	+	Missense_Mutation	SNP	G	G	T	c.G142T	p.A48S	ENST00000376227
P003	CACNA1F	hg19	chrX	49076218	49076218	+	Silent	SNP	C	C	T	c.G2451A	p.E817E	ENST00000376265
P003	CACNA1F	hg19	chrX	49067882	49067882	+	Missense_Mutation	SNP	C	C	T	c.G4193A	p.C1398Y	ENST00000376265
P003	CACNA1F	hg19	chrX	49087437	49087437	+	Nonsense_Mutation	SNP	G	G	T	c.C396A	p.Y132X	ENST00000376265
P003	NAA10	hg19	chrX	153195556	153195556	+	Missense_Mutation	SNP	T	T	C	c.A592G	p.K198E	ENST00000464845
P003	ELF4	hg19	chrX	129208716	129208716	+	Silent	SNP	G	G	T	c.C33A	p.P11P	ENST00000434609
P003	ELF4	hg19	chrX	129201281	129201281	+	Missense_Mutation	SNP	G	G	T	c.C1407A	p.F469L	ENST00000335997
P003	MTMR8	hg19	chrX	63445540	63445540	+	5'UTR	SNP	A	A	G	c.T1116C	p.L372L	ENST00000453546
P003	SLC25A14	hg19	chrX	129493096	129493096	+	Missense_Mutation	SNP	G	G	C	c.G661C	p.A221P	ENST00000339231
P003	SLC25A14	hg19	chrX	129493064	129493064	+	Missense_Mutation	SNP	T	T	C	c.T629C	p.M210T	ENST00000339231
P003	SLC25A14	hg19	chrX	129493065	129493065	+	Missense_Mutation	SNP	G	G	A	c.G630A	p.M210I	ENST00000339231
P003	SLC25A14	hg19	chrX	129493095	129493095	+	Missense_Mutation	SNP	C	C	G	c.C660G	p.N220K	ENST00000339231
P003	PIM2	hg19	chrX	48772645	48772645	+	Missense_Mutation	SNP	C	C	T	c.G247A	p.E83K	ENST00000376509
P003	RS1	hg19	chrX	18662552	18662552	+	Missense_Mutation	SNP	G	G	A	c.C520T	p.R174W	ENST00000379984
P003	TAZ	hg19	chrX	153649259	153649259	+	Silent	SNP	C	C	T	c.C795T	p.A265A	ENST00000299328
P003	RAB40AL	hg19	chrX	102192772	102192772	+	Missense_Mutation	SNP	C	C	A	c.C526A	p.L176M	ENST00000218249
P003	MAGT1	hg19	chrX	77150998	77150998	+	Silent	SNP	C	C	T	c.G6A	p.R2R	ENST00000358075
P003	PHEX	hg19	chrX	22065299	22065299	+	Missense_Mutation	SNP	C	C	A	c.C319A	p.L107M	ENST00000537599
P003	CDK16	hg19	chrX	47083116	47083116	+	Missense_Mutation	SNP	G	G	A	c.G160A	p.G54R	ENST00000522883
P003	USP11	hg19	chrX	47102847	47102847	+	Missense_Mutation	SNP	G	G	A	c.G1636A	p.V546M	ENST00000377107
P003	TIMP1	hg19	chrX	47441988	47441988	+	Intron	SNP	G	G	A	c.G27A	p.A9A	ENST00000441738
P003	GABRE	hg19	chrX	151124222	151124230	+	In_Frame_Del	DEL	AGGAAACCC	AGGAAACCC	-	c.887_895del	p.296_299del	ENST00000370328
P003	PCDH11X	hg19	chrX	91542975	91542975	+	Missense_Mutation	SNP	A	A	C	c.A3154C	p.T1052P	ENST00000504220
P003	PORCN	hg19	chrX	48368339	48368339	+	Missense_Mutation	SNP	G	G	T	c.G131T	p.R44M	ENST00000489940
P003	PORCN	hg19	chrX	48369853	48369893	+	Frame_Shift_Del	DEL	ATCCTCATCTACCTACTCATGGGGTATGAGTATGCATCCTT	ATCCTCATCTACCTACTCATGGGGTATGAGTATGCATCCTT	-	c.307_329del	p.I103fs	ENST00000537758
P003	ITIH6	hg19	chrX	54777708	54777708	+	Missense_Mutation	SNP	C	C	T	c.G3458A	p.R1153Q	ENST00000218436
P003	DRP2	hg19	chrX	100505565	100505565	+	Missense_Mutation	SNP	G	G	A	c.G1694A	p.R565H	ENST00000402866
P003	DRP2	hg19	chrX	100497333	100497333	+	Missense_Mutation	SNP	C	C	A	c.C848A	p.S283Y	ENST00000402866
P003	DRP2	hg19	chrX	100492684	100492684	+	Missense_Mutation	SNP	C	C	A	c.C358A	p.Q120K	ENST00000402866
P003	DRP2	hg19	chrX	100513357	100513357	+	Missense_Mutation	SNP	C	C	T	c.C2450T	p.P817L	ENST00000402866
P003	KIAA0226L	hg19	chr13	46930625	46930625	+	Missense_Mutation	SNP	G	G	T	c.C1272A	p.D424E	ENST00000429979
P003	FLT1	hg19	chr13	28942736	28942736	+	Silent	SNP	C	C	T	c.G2181A	p.S727S	ENST00000541932
P003	MLLT4	hg19	chr13	28942771	28942771	+	In_Frame_Ins	INS	-	-	TGCTGCTGCTGT	c.2145_2146insACAGCAGCAGCA	p.S716delinsTAAAS	ENST00000447894
P003	MEDAG	hg19	chr13	31495164	31495164	+	Silent	SNP	G	G	A	c.G402A	p.A134A	ENST00000380482
P003	OLFM4	hg19	chr13	53603031	53603031	+	Silent	SNP	G	G	T	c.G60T	p.G20G	ENST00000219022
P003	CORO1A	hg19	chr16	30197941	30197941	+	Missense_Mutation	SNP	C	C	T	c.C221T	p.A74V	ENST00000570045
P003	LONP2	hg19	chr16	48292550	48292550	+	Nonsense_Mutation	SNP	G	G	T	c.G622T	p.E208X	ENST00000566755
P003	MMP15	hg19	chr16	58060327	58060327	+	Missense_Mutation	SNP	G	G	A	c.G73A	p.A25T	ENST00000219271
P003	NPRL3	hg19	chr16	138887	138887	+	Silent	SNP	G	G	T	c.C1353A	p.T451T	ENST00000399953
P003	NECAB2	hg19	chr16	84031838	84031838	+	Missense_Mutation	SNP	C	C	T	c.C878T	p.A293V	ENST00000305202
P003	WFDC1	hg19	chr16	84328619	84328619	+	Missense_Mutation	SNP	G	G	T	c.G42T	p.Q14H	ENST00000568638
P003	SEC14L5	hg19	chr16	5053525	5053525	+	Missense_Mutation	SNP	G	G	A	c.G1253A	p.R418Q	ENST00000251170
P003	NARFL	hg19	chr16	786393	786393	+	Silent	SNP	C	C	T	c.G6A	p.A2A	ENST00000566614
P003	EARS2	hg19	chr16	23540895	23540895	+	Missense_Mutation	SNP	C	C	T	c.G1280A	p.R427H	ENST00000564501
P003	STX4	hg19	chr16	31049314	31049314	+	Missense_Mutation	SNP	G	G	A	c.G440A	p.R147Q	ENST00000394998
P003	TMC5	hg19	chr16	19451918	19451918	+	Missense_Mutation	SNP	G	G	T	c.G558T	p.K186N	ENST00000542583
P003	CORO2B	hg19	chr15	69003220	69003220	+	Missense_Mutation	SNP	G	G	T	c.G483T	p.K161N	ENST00000566799
P003	RASL12	hg19	chr15	65368872	65368872	+	5'Flank	SNP	G	G	A	c.C65T	p.P22L	ENST00000434605
P003	RHOV	hg19	chr15	41165619	41165619	+	Missense_Mutation	SNP	G	G	T	c.C348A	p.S116R	ENST00000220507
P003	EYA1	hg19	chr8	72111653	72111653	+	Silent	SNP	G	G	A	c.C1701T	p.H567H	ENST00000340726
P003	IKBKB	hg19	chr8	42174376	42174376	+	Missense_Mutation	SNP	C	C	T	c.C1079T	p.A360V	ENST00000521661
P003	SLC39A14	hg19	chr8	22291481	22291481	+	Missense_Mutation	SNP	G	G	C	c.G1410C	p.L470F	ENST00000240095
P003	SLC39A14	hg19	chr8	22291474	22291474	+	Missense_Mutation	SNP	T	T	C	c.T1403C	p.L468P	ENST00000240095
P003	SLC39A14	hg19	chr8	22291475	22291475	+	Silent	SNP	T	T	C	c.T1404C	p.L468L	ENST00000240095
P003	SLC39A14	hg19	chr8	22291472	22291472	+	Silent	SNP	G	G	T	c.G1401T	p.P467P	ENST00000240095
P003	ARHGEF10	hg19	chr8	1808193	1808193	+	Silent	SNP	C	C	T	c.C396T	p.P132P	ENST00000518288
P003	MCM4	hg19	chr8	48874746	48874746	+	Silent	SNP	G	G	A	c.G369A	p.K123K	ENST00000523944
P003	NUCB1	hg19	chr19	49416427	49416427	+	Missense_Mutation	SNP	C	C	T	c.C640T	p.R214C	ENST00000452087
P003	PPP1R37	hg19	chr19	45649076	45649076	+	Missense_Mutation	SNP	A	A	C	c.A1750C	p.T584P	ENST00000421905
P003	DOT1L	hg19	chr19	2214480	2214480	+	Missense_Mutation	SNP	G	G	A	c.G1808A	p.R603H	ENST00000398665
P003	MED25	hg19	chr19	50331794	50331794	+	Missense_Mutation	SNP	C	C	T	c.C394T	p.R132C	ENST00000595185
P003	TIMM44	hg19	chr19	8000073	8000073	+	Intron	SNP	G	G	T	c.C378A	p.L126L	ENST00000595876
P003	PPP6R1	hg19	chr19	55743537	55743537	+	Missense_Mutation	SNP	G	G	C	c.C2031G	p.D677E	ENST00000412770
P003	ILVBL	hg19	chr19	15226670	15226670	+	Silent	SNP	G	G	T	c.C1605A	p.V535V	ENST00000263383
P003	SLC1A6	hg19	chr19	15067354	15067354	+	Missense_Mutation	SNP	C	C	T	c.G911A	p.R304Q	ENST00000430939
P003	ANKRD27	hg19	chr19	33095324	33095324	+	Missense_Mutation	SNP	C	C	A	c.G2500T	p.A834S	ENST00000306065
P003	PIAS4	hg19	chr19	4037775	4037777	+	In_Frame_Del	DEL	GAG	GAG	-	c.1435_1437del	p.479_479del	ENST00000262971
P003	ATP5SL	hg19	chr19	41939573	41939573	+	Missense_Mutation	SNP	C	C	T	c.G302A	p.R101Q	ENST00000589970
P003	PLIN3	hg19	chr19	4861415	4861415	+	5'UTR	SNP	C	C	T	c.G55A	p.A19T	ENST00000589494
P003	MYH14	hg19	chr19	50796511	50796511	+	Missense_Mutation	SNP	G	G	T	c.G5278T	p.A1760S	ENST00000601313
P003	MYH14	hg19	chr19	50735295	50735295	+	Missense_Mutation	SNP	G	G	A	c.G1082A	p.R361Q	ENST00000601313
P003	CD79A	hg19	chr19	42383144	42383144	+	Missense_Mutation	SNP	C	C	T	c.C164T	p.P55L	ENST00000597454
P003	ICAM4	hg19	chr19	10398859	10398859	+	Nonstop_Mutation	SNP	G	G	C	c.G818C	p.X273S	ENST00000340992
P003	CRX	hg19	chr19	48339506	48339506	+	Missense_Mutation	SNP	C	C	A	c.C107A	p.P36H	ENST00000566686
P003	NAPA	hg19	chr19	47998827	47998827	+	Missense_Mutation	SNP	T	T	C	c.A172G	p.I58V	ENST00000597118
P003	MEIS3	hg19	chr19	47920916	47920916	+	Intron	SNP	T	T	A	c.A89T	p.H30L	ENST00000561096
P003	MAST1	hg19	chr19	12962751	12962751	+	Missense_Mutation	SNP	T	T	C	c.T766C	p.Y256H	ENST00000591495
P003	DDX49	hg19	chr19	19031688	19031688	+	Intron	SNP	A	A	G	c.A274G	p.T92A	ENST00000594021
P003	ARMC6	hg19	chr19	19148395	19148395	+	Intron	SNP	A	A	G	c.A64G	p.K22E	ENST00000539985
P003	ARMC6	hg19	chr19	19162900	19162900	+	Missense_Mutation	SNP	C	C	A	c.C674A	p.T225N	ENST00000537263
P003	ARMC6	hg19	chr19	19148442	19148442	+	Intron	SNP	A	A	T	c.A111T	p.A37A	ENST00000539985
[truncated: 28,683 more rows]

## Sheet: Supplementary Table S5
Supplementary Table S5. Summary of the number of identified somatic mutations, predicted neoantigens and synthesized vaccine peptides
Patient ID		P001	P002	P003	P004	P005	P006	P007	P008	P009	P010	P011	P012	P013	P014	P015	P016	P017	P018	P019	P020	P021	P022
Total mutations	Total number	707	542	3970	2257	54	1615	509	446	265	4325	6002	992	274	2751	907	1052	224	122	126	2921	2577	838
	Missense_Mutation	325	248	1939	810	34	903	235	211	149	2725	3540	567	131	650	545	674	139	60	94	110	1308	350
	In_Frame_InDel	47	46	70	2	1	45	36	39	19	30	36	31	15	33	23	9	8	11	4	4	42	2
	Frame_Shift_InDel	26	8	66	5	2	37	7	14	2	65	99	19	10	9	5	27	1	5	7	12	27	12
	Nonstop_Mutation	1	1	11	0	0	1	0	0	0	0	7	2	1	2	3	2	1	0	0	0	3	1
	Other	308	239	1884	1440	17	629	231	182	95	1505	2320	373	117	2057	331	340	75	46	21	2795	1197	473
Mutations with more than one noeantigen	Total number	345	259	1622	788	32	832	246	210	134	1336	3232	559	141	633	544	650	128	63	95	110	1281	344
	Missense_Mutation	286	210	1484	785	31	758	217	182	120	1304	3130	520	120	607	528	614	121	56	84	104	1216	330
	In_Frame_InDel	32	42	67	0	0	40	22	17	12	6	24	21	11	20	11	8	6	6	4	0	38	2
	Frame_Shift_InDel	26	7	64	3	1	34	7	11	2	26	75	18	10	6	5	27	1	1	7	6	27	12
	Nonstop_Mutation	1	0	7	0	0	0	0	0	0	0	3	0	0	0	0	1	0	0	0	0	0	0
Number of peptides included in vaccine		18	14	11	17	7	11	14	15	11	13	15	15	14	18	14	17	14	18	9	7	6	6

## Sheet: Supplementary Table S6
Supplementary Table S6. HLA allotypes in both normal and tumor cells for each patient
	Normal						Tumor
Patient ID	HLA-class I			HLA-class II			HLA-class I			HLA-class II
P001	A*02:07	B*27:04	C*01:02	DPB1*02:02	DQB1*03:01	DRB1*08:03	A*02:07	B*27:04	C*01:02	DPB1*02:02	DQB1*03:01	DRB1*08:03
P001	A*11:02	B*46:01	C*12:02	DPB1*03:01	DQB1*06:01	DRB1*12:01	A*11:02	B*46:01	C*12:02	DPB1*03:01	DQB1*06:01	DRB1*12:01
P002	A*11:01	B*39:01	C*03:04	DPB1*05:01	DQB1*05:02	DRB1*08:01	A*11:01	B*39:01	C*03:04	DPB1*05:01	DQB1*05:02	DRB1*08:01
P002	A*24:02	B*40:01	C*07:02	DPB1*05:01	DQB1*06:01	DRB1*16:01	A*24:02	B*40:01	C*07:02	DPB1*05:01	DQB1*06:01	DRB1*16:01
P003	A*02:01	B*13:01	C*03:04	DPB1*05:01	DQB1*03:03	DRB1*09:01	A*02:01	B*13:01	C*03:04	DPB1*05:01	DQB1*03:03	DRB1*09:01
P003	A*11:01	B*40:06	C*08:22	DPB1*05:01	DQB1*06:01	DRB1*15:01	A*11:01	B*40:06	C*08:22	DPB1*05:01	DQB1*06:01	DRB1*15:01
P004	A*02:01	B*39:01	C*03:04		DQB1*05:01	DRB1*08:03	A*02:01	B*39:01	C*03:04		DQB1*05:01	DRB1*08:03
P004	A*24:02	B*40:03	C*07:02		DQB1*06:01	DRB1*10:01	A*24:02	B*40:03	C*07:02		DQB1*06:01	DRB1*10:01
P005	A*02:01	B*13:01	C*01:02		DQB1*03:01	DRB1*04:07	A*02:01	B*13:01	C*01:02		DQB1*03:01	DRB1*04:07
P005	A*33:03	B*27:05	C*03:04		DQB1*03:01	DRB1*12:02	A*33:03	B*27:05	C*03:04		DQB1*03:01	DRB1*12:02
P006	A*02:01	B*40:01	C*01:02	DPB1*02:02	DQB1*03:01	DRB1*12:02	A*02:01	B*40:01	C*01:02	DPB1*02:02	DQB1*03:01	DRB1*12:02
P006	A*02:07	B*46:01	C*07:02	DPB1*05:01	DQB1*05:02	DRB1*16:02	A*02:07	B*46:01	C*07:02	DPB1*05:01	DQB1*05:02	DRB1*16:02
P007	A*11:01	B*15:01	C*04:01	DPB1*05:01	DQB1*04:01	DRB1*04:05	A*11:01	B*15:01	C*04:01	DPB1*05:01	DQB1*04:01	DRB1*04:05
P007	A*24:02	B*48:01	C*08:01	DPB1*05:01	DQB1*04:02	DRB1*08:02	A*24:02	B*48:01	C*08:01	DPB1*05:01	DQB1*04:02	DRB1*08:02
P008	A*31:01	B*07:05	C*03:03	DPB1*02:01	DQB1*03:01	DRB1*08:03	A*31:01	B*07:05	C*03:03	DPB1*02:01	DQB1*03:01	DRB1*08:03
P008	A*34:01	B*55:02	C*15:05	DPB1*05:01	DQB1*05:02	DRB1*16:02	A*31:01	B*55:02	C*15:05	DPB1*05:01	DQB1*05:02	DRB1*16:02
P009	A*02:06	B*13:01	C*03:03	DPB1*05:01	DQB1*03:01	DRB1*12:02	A*02:06	B*13:01	C*03:03	DPB1*05:01	DQB1*03:01	DRB1*12:02
P009	A*24:02	B*35:01	C*03:04	DPB1*05:01	DQB1*06:02	DRB1*15:01	A*24:02	B*35:01	C*03:04	DPB1*05:01	DQB1*06:02	DRB1*15:01
P010	A*02:01	B*46:01	C*01:02		DQB1*03:03	DRB1*09:01	A*02:01	B*46:01	C*01:02		DQB1*03:03	DRB1*09:01
P010	A*02:07	B*51:01	C*14:02		DQB1*03:03	DRB1*09:01	A*02:07	B*51:01	C*14:02		DQB1*03:03	DRB1*09:01
P011	A*02:03	B*48:01	C*08:03	DPB1*03:01	DQB1*04:02	DRB1*04:10	A*02:03	B*48:01	C*08:03	DPB1*03:01	DQB1*04:02	DRB1*04:10
P011	A*11:01	B*51:01	C*15:02	DPB1*03:01	DQB1*05:02	DRB1*15:02	A*11:01	B*51:01	C*15:02	DPB1*03:01	DQB1*05:02	DRB1*15:02
P012	A*02:01	B*13:02	C*03:02	DPB1*02:01	DQB1*02:01	DRB1*03:01	A*02:01	B*13:02	C*03:02	DPB1*02:01	DQB1*02:01	DRB1*03:01
P012	A*33:03	B*58:01	C*06:02	DPB1*03:01	DQB1*02:02	DRB1*07:01	A*33:03	B*58:01	C*06:02	DPB1*03:01	DQB1*02:02	DRB1*07:01
P013	A*02:01	B*15:11	C*03:03	DPB1*02:02	DQB1*03:03	DRB1*04:05	A*02:01	B*15:11	C*03:03	DPB1*02:02	DQB1*03:03	DRB1*04:05
P013	A*03:01	B*51:01	C*15:02	DPB1*05:01	DQB1*04:01	DRB1*09:01	A*03:01	B*51:01	C*15:02	DPB1*05:01	DQB1*04:01	DRB1*09:01
P014	A*02:01	B*40:01	C*07:02	DPB1*05:01	DQB1*03:01	DRB1*04:05	A*02:01	B*40:01	C*07:02	DPB1*05:01	DQB1*03:01	DRB1*04:05
P014	A*02:06	B*48:03	C*08:01	DPB1*27:01	DQB1*04:01	DRB1*11:01	A*02:06	B*48:03	C*08:01	DPB1*27:01	DQB1*04:01	DRB1*11:01
P015	A*11:01	B*13:01	C*01:02	DPB1*03:01	DQB1*04:02	DRB1*04:10	A*11:01	B*13:01	C*01:02	DPB1*03:01	DQB1*04:02	DRB1*04:10
P015	A*24:02	B*55:01	C*03:04	DPB1*13:01	DQB1*06:03	DRB1*13:01	A*24:02	B*55:01	C*03:04	DPB1*13:01	DQB1*06:03	DRB1*13:01
P016	A*11:01	B*14:02	C*03:03	DPB1*04:01	DQB1*05:01	DRB1*01:02	A*11:01	B*14:02	C*03:03	DPB1*04:01	DQB1*05:01	DRB1*01:02
P016	A*24:02	B*55:01	C*08:02	DPB1*04:01	DQB1*05:03	DRB1*14:54	A*24:02	B*55:01	C*08:02	DPB1*04:01	DQB1*05:03	DRB1*14:54
P017	A*02:07	B*46:01	C*01:02	DPB1*05:01	DQB1*03:01	DRB1*09:01	A*02:07	B*46:01	C*01:02	DPB1*05:01	DQB1*03:01	DRB1*09:01
P017	A*11:01	B*51:01	C*01:02	DPB1*05:01	DQB1*03:03	DRB1*12:02	A*11:01	B*51:01	C*01:02	DPB1*05:01	DQB1*03:03	DRB1*12:02
P018	A*01:01	B*37:01	C*06:02		DQB1*05:01	DRB1*01:01	A*01:01	B*37:01	C*06:02		DQB1*05:01	DRB1*01:01
P018	A*02:07	B*38:01	C*12:03		DQB1*05:01	DRB1*10:01	A*02:07	B*38:01	C*12:03		DQB1*05:01	DRB1*10:01
P019	A*01:01	B*37:01	C*06:02	DPB1*02:01	DQB1*03:01	DRB1*04:01	A*01:01	B*37:01	C*06:02	DPB1*02:01	DQB1*03:01	DRB1*04:01
P019	A*33:03	B*51:01	C*07:02	DPB1*05:01	DQB1*05:01	DRB1*10:01	A*33:03	B*51:01	C*07:02	DPB1*05:01	DQB1*05:01	DRB1*10:01
P020	A*03:01	B*08:01	C*03:04		DQB1*02:01	DRB1*03:01	A*03:01	B*08:01	C*03:04		DQB1*02:01	DRB1*03:01
P020	A*11:01	B*40:01	C*07:02		DQB1*06:01	DRB1*08:03	A*11:01	B*40:01	C*07:02		DQB1*06:01	DRB1*08:03
P021	A*02:01	B*13:02	C*03:03	DPB1*05:01	DQB1*03:03	DRB1*09:01	A*02:01	B*13:02	C*03:03	DPB1*05:01	DQB1*03:03	DRB1*09:01
P021	A*30:01	B*48:01	C*06:02	DPB1*05:01	DQB1*05:03	DRB1*14:54	A*30:01	B*48:01	C*06:02	DPB1*05:01	DQB1*05:03	DRB1*14:54
P022	A*02:06	B*13:02	C*03:03	DPB1*135:01	DQB1*02:02	DRB1*07:01	A*02:06	B*13:02	C*03:03	DPB1*135:01	DQB1*02:02	DRB1*07:01
P022	A*30:01	B*35:01	C*06:02	DPB1*17:01	DQB1*03:03	DRB1*09:01	A*30:01	B*35:01	C*06:02	DPB1*17:01	DQB1*03:03	DRB1*09:01

## Sheet: Supplementary Table S7
S pplementary Table S7. S mmary of designed and synthesized peptides for each patient
Patient ID	Immunizing pools	Gene_name	Chr	POSITION	Ref_bp	Alt_bp	Mutation_type	Peptide ID	Designed_peptide_for_synthesis	Tumor Variant Freq.(exome)	Number of Class I epitopes	Number of Class II epitopes	Water solubility
P001	A	EIF2B3	chr1	45407265	C	T	SNV	04	LITDVALHEVVDLFRTYDASLAMLMRKGQDS	0.3525	18	58	Yes
P001	A	RBMXL2	chr11	7110547	G	A	SNV	10	GFAFVTFESPADAKAATRDMNGKSLD	0.4425	5	26	Yes
P001	A	TMBIM4	chr12	66531936	-	A	INDEL	16	SKKDFSKFGAGFFFYSEII	0.14	6	16	Yes
P001	A	TNFAIP2	chr14	103601678	C	T	SNV	18	SMGAQEPSRPLFFLIKVG	0.7875	13	58	Yes
P001	A	FLNB	chr3	58094257	C	T	SNV	33	KSGCIVNNLAEFTVDSKDAGKAPLK	0.3675	6	13	Yes
P001	B	AHNAK	chr11	62284394	C	G	SNV	06	KHGKLKFGTFGGLGSKTKGHYEVTGS	0.4	8	29	Yes
P001	B	AZI1	chr17	79163569	T	C	SNV	09	ELLEQHRRPTPSTKWLKTTASFTVKMQPQVLS	0.16	24	22	Yes
P001	B	KLK6	chr19	51466584	A	G	SNV	12	CSANTTSCHTLGWGKTADG	0.6025	16	16	Yes
P001	B	RBM28	chr7	127981201	G	A	SNV	17	SNAVEREVEHMNYVSFSGSKACR	0.475	4	54	Yes
P001	B	GIMAP6	chr7	150324934	C	A	SNV	31	YQYTQQNFRLKELQEMQVSQGQGS	0.3625	3	21	Yes
P001	C	ATP2A1	chr16	28913639	-	C	INDEL	05	HQWLALLPLHGNRGLCGCSHR	0.2	21	27	Yes
P001	C	CYP4F2	chr19	15989613	C	T	SNV	11	EPRRKPELVLRAEGRLWLRVEPLS	0.7425	18	18	Yes
P001	C	ANKRD30BL	chr2	132905706	A	G	SNV	28B	RTPDTAESLVERTPDEQC	0.11	7	50	Yes
P001	C	MAGEC3	chrX	140969189	C	A	SNV	34	KRLWGEKAGRLPESEPLFTYTLDEK	0.4025	13	58	Yes
P001	D	ATP2A1	chr16	28913639	-	C	INDEL	07	DLDIMDRPPPEPQGAPHQWLALLPLHGNRGL	0.2	30	35	Yes
P001	D	DNMT1	chr19	10250935	G	A	SNV	08	IEMWDPAAQAFRLNNLGSTVFTEDCNILLKL	0.48	9	14	Yes
P001	D	ARID1B	chr6	157511195	A	G	SNV	25	MTPMQGGRSSTISVHGPFSDVSD	0.3375	7	25	Yes
P001	D	HNRNPK	chr9	86587020	C	G	SNV	27	FYDETYDYGGFTMMFHDRRGRPVGFPMRGR	0.5	17	22	Yes
P002	A	ND FS8	chr11	67799635	C	A	SNV	02	LVRVGDHWEDALPDQAYAAAGPGPG	0.1133	11	55	Yes
P002	A	STAB2	chr12	104056702	G	A	SNV	10	IEITAKNGRIYTLTRVLIPPSIVPILPHRC	0.1333	11	58	Yes
P002	A	IRS2	chr13	110435612	C	T	SNV	11	SPGEYINIDFGEPGAHLSPPAPPLLASAASS	0.1975	9	44	Yes
P002	A	CCDC176	chr14	74489820	G	T	SNV	19	CKMEKDIMSVLSYLNKQDQEKDNM	0.14	12	30	Yes
P002	A	SCML4	chr6	108066160	C	A	SNV	29	GCSASEKVQEKEEGRIESGG	0.1267	1	24	Yes
P002	B	CALHM1	chr10	105215056	G	T	SNV	05	GWAGGGPRPQRKEVATYFSKV	0.16	7	22	Yes
P002	B	ND FS8	chr11	67799635	C	A	SNV	09	MRCLTKPMLLRALAQAARAGP	0.1133	11	42	Yes
P002	B	SS18	chr18	23615857	G	A	SNV	17	DGHNDYGYQQPLYPEQGYDRPY	0.1825	14	58	Yes
P002	B	SCML4	chr6	108066160	C	A	SNV	20	KVQEKEEGRIESVVFVVALGF	0.1267	14	46	Yes
P002	B	PPP1R17	chr7	31746839	A	G	SNV	30	LHMSPFAAGVTLLRDGRPKAIVEDDEK	0.1267	5	51	Yes
P002	C	CALHM1	chr10	105215057	G	T	SNV	06	GWAGGGPRPTRKEVATYFSKV	0.17	6	26	Yes
P002	C	CCDC176	chr14	74489828	A	G	SNV	08	MEKDIMSVLSYLKKQGQEKDNMIEKLKQQLN	0.1267	5	24	Yes
P002	C	HNF1B	chr17	36104805	TCCTTGG	-	INDEL	14	SLQQELLSALLSSGVRCWFRPWRS	0.175	42	37	Yes
P002	C	LMBR1	chr7	156529243	C	G	SNV	28	TGRQVPEEQAAQLLLGKWIQEGGDMI	0.1133	16	43	Yes
P003	A	SFSWAP	chr12	132237680	C	G	SNV	04	VQPSQVEYTADSTVAGMYYSYYMLPDGTYCLKK	0.1975	12	54	No
P003	A	ACACB	chr12	109604701	-	A	INDEL	14	LHLVKRGAGTQEAGPAQRLYRGFSR	0.195	32	29	Yes
P003	A	PHF23	chr17	7139413	G	C	SNV	30B	ATVVGGEAPVPVLPTRPEAPRPPA	0.4267	2	19	Yes
P003	A	GLE1	chr9	131287558	A	G	SNV	37	RALREMRDLLMNLGQEVTRACEDKRR	0.3733	13	23	Yes
P003	B	CTNNB1	chr3	41266136	T	C	SNV	05	YLDSGIHSGATTTAPPLSGKG	0.365	8	50	Yes
P003	B	LSM11	chr5	157178426	-	T	INDEL	15	RMPLHEGSPLGELSSLYP	0.17	2	11	Yes
P003	B	ARMC2	chr6	109232129	A	T	SNV	50	AKIILALKVSRKNLLYVCKLIFKISRNEKND	0.4225	18	19	Yes
P003	C	KIF17	chr1	21024942	A	G	SNV	02	LSALLSRQVPPDPVQAEEKLLPQPVIQH	0.4567	4	1	Yes
P003	C	SLC30A1	chr1	211751563	A	T	SNV	03	VLGVGVAGLLVNVLGHCLFHHHSGFSQDSG	0.44	20	49	Yes
P003	C	SLC2A2	chr3	170723180	T	G	SNV	06	EMRKEREEASSAQKVSIIQLFTNSSYR	0.34	10	41	Yes
P003	C	DST	chr6	56382361	T	C	SNV	07B	KKADAELSWITETEKKLVSLGDIRLEQDQTS	0.41	12	23	Yes
P003	C	AMD1	chr6	111214789	T	A	SNV	16	QSAMFNDYNFVFTSLAKKQQQQQS	0.415	12	33	Yes
P004	A	GREM2	chr1	240656691	C	T	SNV	13	VLVKVAEARKNRPAGTIPSPYKDGS	0.4233	6	3	Yes
P004	A	REC8	chr14	24649065	CT	-	INDEL	17B	SLVSPQPPQDGCPGLLPAPGALSATKK	0.38	8	21	Yes
P004	A	ANKMY1	chr2	241463499	TG	-	INDEL	23B	HVESGLEDVLGNRPGQSVQ	0.37	14	33	Yes
P004	A	IL20RB	chr3	136701087	G	T	SNV	60	KKTEGPECDVTYDITATVPYNLRVRAT	0.4025	12	17	Yes
P004	A	SLC4A2	chr7	150761800	G	-	INDEL	61	GVPRGAPCPKPSLGTAATTFRRGGASGA	0.36	13	25	Yes
P004	B	REC8	chr14	24649065	CT	-	INDEL	14	RLESIYKAARKPATSSKPRRASLGPAYLISEC	0.38	18	35	Yes
P004	B	PTPRG	chr3	61734656	G	T	SNV	48	KASGDPYWAYSCAYGPEHWVTS	0.4225	1	22	Yes
P004	B	SLC4A2	chr7	150761800	G	-	INDEL	56	DEASEAEGPGLSLSRPLSPHPPRC SKRMT	0.36	25	26	Yes
P004	B	SLC4A2	chr7	150761800	G	-	INDEL	58	LPLHHCPTRRRLLGPPKGPRLEPRWRRRRRR	0.36	24	46	Yes
P004	B	SHROOM2	chrX	9864161	C	G	SNV	63	TVPHFWEAGLAQPPSCTSGGPHPPRI	0.41	11	10	Yes
P004	C	REC8	chr14	24649065	CT	-	INDEL	02B	AYLISECAFPAFLLSELLFKQKTSCFYYKKKK	0.38	45	58	Yes
P004	C	BDKRB1	chr14	96730965	G	T	SNV	10B	AFTNSSLNPVIYVFVCRLFRTKVWELYKQCTKK	0.4325	21	59	Yes
P004	C	SLC4A2	chr7	150761800	G	-	INDEL	57	RC SKRMTVLTGRQRGPVHLPLHHCPTRRR	0.36	28	42	Yes
P004	C	TEK	chr9	27220069	G	T	SNV	64	KLWEIVSLGGTPYCGITCAELYEKLPQGYRL	0.5133	5	18	Yes
P004	D	NLRP3	chr1	247588106	G	T	SNV	04	KKTTAVYVFFLSSLLQPLGGSQEHGL	0.4567	8	26	Yes
P004	D	SLC12A7	chr5	1057683	C	T	SNV	05B	RTQAPPTPDKMQMTWTREKLIAEKYRS	0.4625	16	24	Yes
P004	D	SLC4A2	chr7	150761800	G	-	INDEL	59	EPRWRRRRRRRWRWPVALQGVTTGVPRG	0.36	42	45	Yes
P005	A	TNKS1BP1	chr11	57080853	T	C	SNV	01	SLVQRRFSEGVLQSPGQDQEKLGGSLAALPQ	0.035	1	13	Yes
P005	A	RAB3IP	chr12	70189165	T	C	SNV	02	KEVTHQGLSPLTLLIPVSSHH	0.05	10	24	Yes
P005	A	KIAA1191	chr5	175774751	C	T	SNV	04	AQKPSPLELIHAQANRMAEDPAALKP	0.0533	3	34	Yes
P005	A	MAD2L1BP	chr6	43597487	A	G	SNV	12	VARVPLGRSLTLSPR	0.045	1	0	Yes
P005	B	PIGK	chr1	77558142	C	A	SNV	03	IIHQKPKLKDWHPPGCFILGLWALI	0.04	21	23	Yes
P005	B	KIF7	chr15	90188645	G	T	SNV	07	NRISNCSQRAGASPGSLPERKGPE	0.04	7	30	Yes
P005	B	SPEG	chr2	220313630	G	A	SNV	08B	GRTEPGKGPQQEVRRRDQFPLT	0.05	8	3	Yes
P006	A	SETD1B	chr12	122248450	CTC	-	INDEL	01	KKKDTELQMEGSPISSSSQLSPLAPFGTNSQ	0.15	11	30	Yes
P006	A	FGF11	chr17	7342994	G	-	INDEL	11B	REVREPGAAGRCRRSGACVPAAPSPFARSSSS	0.14	16	42	Yes
P006	A	MTIF2	chr2	55481231	G	C	SNV	24	VDHGKTTLLDKFRKTEVAAVETGGITQHIGA	0.2475	8	58	Yes
P006	A	BRD2	chr6	32947705	C	T	SNV	27	SRPMSYDEKWQLSLDINKLPGEKLGR	0.1325	13	27	Yes
P006	B	PIWIL1	chr12	130847536	C	T	SNV	02	DRGQELVDGLKVCLQVALRAWNSCNEYMPSR	0.24	21	50	Yes
P006	B	TRAF3	chr14	103363722	A	G	SNV	10	IEIERQKEMLRNNESRILHLQRVIDSQAEKL	0.1533	13	54	Yes
P006	B	FGF11	chr17	7342994	G	-	INDEL	26	RSLSSKASSPNCSAARVSTSRRIPTEAS	0.14	7	53	Yes
P006	B	EFNA5	chr5	106763121	T	G	SNV	29	YLDVFCPHYEDSVPEAKTERYVLYMVNFDGY	0.1233	5	22	Yes
P006	C	CDYL2	chr16	80666993	C	T	SNV	06	VRQNESNCRFRDIIVRKEEGFTHILLSSQT	0.1875	5	50	Yes
P006	C	FGF11	chr17	7342994	G	-	INDEL	12	AARVSTSRRIPTEASRAPQRIPAPSPTST	0.14	6	24	Yes
P006	C	SHANK1	chr19	51170859	G	T	SNV	30	PAARRSLLHRLPPTAHGVGPLLLQLGTEPPA	0.15	17	51	Yes
P007	A	SP48	chr1	22033385	-	A	INDEL	04	KKKKNEDILCPHAVFFFFQIYFFKLR	0.14	26	30	Yes
P007	A	DCTPP1	chr16	30435635	C	A	SNV	08	RSSSRKYTEFPHGAISEDQAVGPA	0.19	7	16	Yes
P007	A	PPP1R9B	chr17	48226952	-	G	INDEL	22	GARGGDPGRGYGPRGPGEWQHR	0.15	10	10	Yes
P007	A	ARHGEF26	chr3	153840733	C	T	SNV	25	SPGSLRRGLRSTSYCRAVVSGFDFDSPT	0.2125	14	36	Yes
P007	B	NOTCH2	chr1	120611964	G	C	SNV	03	RPALLWALLALWLCWAAPAHALQCRDGKKKKK	0.15	25	29	Yes
P007	B	PPP1R9B	chr17	48226952	-	G	INDEL	10	GEWQHRGNCSQPRARGAK	0.15	1	25	Yes
P007	B	GNRH2	chr20	3026345	-	GCCCC	INDEL	14	RKRHLARTLLTAAREPRPAPPRHPPIKCEVLR	0.15	15	11	Yes
P007	B	ZNF117	chr7	64439449	C	T	SNV	21	RIHTGEKPYKYKECGKAFNQTSHLIR	0.225	1	14	Yes
P007	B	H WE1	chrX	53657949	A	C	SNV	23	DKQMLLFTHIRLAHGCSNHRKRLQAVQARLH	0.1725	15	21	Yes
P007	C	PPP1R9B	chr17	48226952	-	G	INDEL	01	SAAREGGGQWPGPGRG	0.15	5	28	Yes
P007	C	HIST1H2BE	chr6	26184252	G	C	SNV	12	IMNSFVNDIFERIAGQASRLAHYNKRSTIT	0.17	9	29	Yes
P007	C	EGFR	chr7	55242468	ATTAAGAGAAGCAAC	-	INDEL	13	PEGEKVKIPVAIKESPKANKEILD	0.635	10	3	Yes
P007	C	FAM47A	chrX	34149314	C	A	SNV	16	SEPSETGVSLLRLAPPKTRRGSSLH	0.1667	10	26	Yes
P007	C	MORF4L2	chrX	102931220	C	G	SNV	24	KKLFVRIGAMLAYTPLDQKSLALLLGYLHDFLK	0.1367	7	35	Yes
P008	A	WDR64	chr1	241912926	G	A	SNV	02	EGKDWKEDKHCLRRLIFLKAQEKH	0.08	1	30	Yes
P008	A	KCNJ1	chr11	128709618	G	A	SNV	27	ILAKISRPKKRAKTIMFSKNAVISKRGGKLC	0.0633	16	58	Yes
P008	A	KRAS	chr12	25398284	C	A	SNV	29	TEYKLVVVGAVGVGKSALTIQLIQNH	0.165	24	44	Yes
P008	A	CYHR1	chr8	145689658	-	C	INDEL	33	YGMWGGGDAGCGRPPEPAGGGQAAAATEGGKK	0.1	12	24	Yes
P008	B	ARSI	chr5	149677547	G	A	SNV	13	SGGSNWPLRGCKGTYWEGGVRGL	0.1067	11	8	Yes
P008	B	MARCKS	chr6	114181209	-	A	INDEL	26	KKKEALFLQEVFQAERLLLQEEQEGGWRRR	0.12	22	58	Yes
P008	B	C6orf211	chr6	151790093	T	G	SNV	32	RKWEFSVPFHQALNGVHPAPLCTIRTLKAEI	0.08	11	55	Yes
P008	C	LCP1	chr13	46732737	G	A	SNV	03	FHGLKSTDVAKTFRKVINKKEGICAIGGTSE	0.1033	17	51	Yes
P008	C	SENP3	chr17	7466503	C	G	SNV	14	PAYSSPRRERLRWPPRPKPRLKSGGG	0.16	7	22	Yes
P008	C	LYSMD3	chr5	89814637	TA	-	INDEL	24	IVKILSHLLLNRKQQLDSLASIL	0.07	17	26	Yes
P008	C	PCDH12	chr5	141334823	A	G	SNV	28	RNASRENLNPPEPQPATGQ	0.0933	1	4	Yes
P008	D	ILDR2	chr1	166891884	C	T	SNV	05	KPDYWSGVMGGSSGASHGPSAMEYNKEDR	0.1233	12	46	Yes
P008	D	MYO3B	chr2	171248925	G	T	SNV	21	YIADETGRVMHYITSKESYRRQFEAIQ	0.1	17	42	Yes
P008	D	MARCKS	chr6	114181209	-	A	INDEL	25	SPSNETPKKKKEALFLQEVFQAERLL	0.12	10	37	Yes
P008	D	GABBR2	chr9	101340354	A	G	SNV	31	LLRPYFLDLRLYDTERDNAKGLKAFYDAIKY	0.09	11	21	Yes
P009	A	MRPL55	chr1	228294582	C	T	SNV	04	TLSPEEHRARLRKREAQLQSRK	0.04	4	22	Yes
P009	A	CHD4	chr12	6711207	CTT	-	INDEL	05	DYTPGKKKKKLGPKK	0.05	1	0	Yes
P009	A	SALL2	chr14	21993502	CTCCT	-	INDEL	15	RRGPDLGQSQAGSNPITSRIDPCTPSSSTTP	0.03	16	26	Yes
P009	B	TCHH	chr1	152083965	A	C	SNV	02	EQEERREQLLKREEERRQQRL	0.06	3	1	Yes
P009	B	SALL2	chr14	21993502	CTCCT	-	INDEL	03	PERRGVSRAFPGRCHRYSGWGRRGPDLG	0.03	25	34	Yes
P009	B	SALL2	chr14	21993502	CTCCT	-	INDEL	13	TPSSSTTPSAPRGRQWPLEYPPDLGR	0.03	1	24	Yes
P009	B	ANKHD1	chr5	139781730	G	A	SNV	16	RLFGEAGPASGVGSSSGGGSGSGTGGGDAALK	0.055	1	26	Yes
P009	C	SALL2	chr14	21993502	CTCCT	-	INDEL	01	ERRGVSRSFPGRCHRYSGWGRRGPDLG	0.03	28	26	Yes
P009	C	SALL2	chr14	21993502	CTCCT	-	INDEL	06	KKKKKPLEYPPDLGRATGAAAAADPSDADD	0.03	8	40	Yes
P009	C	NPIPB6	chr16	28354457	G	A	SNV	14	MVAAEHRHSSGLPYWLYLTAETLKNRMGRQP	0.11	1	43	Yes
P009	C	CHPF2	chr7	150931207	A	G	SNV	17	LRTSLSLLRVSWIQGGGEDPCV	0.03	3	22	Yes
P010	C	ZNF829	chr19	37406711	A	C	SNV	02	GGSRGQEIETSLANMETSLRSGQIPTK	0.21	6	38	No
P010	C	ADRA1A	chr8	26606058	T	C	SNV	05	KFVFLVETGFHHVGQDGLD	0.25	2	6	No
P010	D	AREL1	chr14	75145005	C	G	SNV	18	YKIFQPGIGSHYVAQAGLELLDSSNLPALAF	0.22	7	51	No
P010	D	MEGF8	chr19	42855694	G	C	SNV	21	CFLFAAYLARYPHGGSRGWD	0.17	6	10	No
P010	A	RASGRF1	chr15	79265685	T	C	SNV	25	KKKMYLTDLAFIEEGTPNCTEDGLVNFSKMRMIS	0.245	6	9	Yes
P010	A	BIRC5	chr17	76212078	A	C	SNV	04	IGPGTVAYACNPSTLGGRGR	0.16	10	16	Yes
P010	A	NFKBID	chr19	36381515	T	C	SNV	07	PPSSASQSAGITGVSHRT	0.1625	4	1	Yes
P010	A	DGCR8	chr22	20080391	G	C	SNV	14	DGVTYGSRTASSKKLAKNKAARA	0.1667	3	10	Yes
P010	A	KIF4A	chrX	69635208	T	C	SNV	19B	SRKNIQGVLLLTPVIPALWEAEARGLLEARS	0.255	17	52	Yes
P010	B	DCN	chr12	91563626	A	G	SNV	22	ETGFHRVSQDGLDLLTSK	0.23	1	7	Yes
P010	B	AREL1	chr14	75144951	A	G	SNV	03	ELLDSSNLPALAFQSAGITGMSQVTQPKK	0.16	12	41	Yes
P010	B	NMRAL1	chr16	4519642	A	G	SNV	11	HQAKIVPLHFSLGDRARLHLKKIK	0.245	8	31	Yes
P010	B	REL	chr2	61147587	T	C	SNV	16	LLTSGDPPTSASQSAGITVKK	0.165	8	1	Yes
P010	B	ADAMTS2	chr5	178578171	A	T	SNV	26	CAPGKFRPGAVAHACNPSTL	0.2	5	15	Yes
P010	C	C4BPB	chr1	207268738	G	C	SNV	12	LRQSLALFPRLECSGTISAHCNLHL	0.16	13	10	Yes
P010	C	FAM178A	chr10	102685952	A	C	SNV	17	RIRYVGRTQWLMPVIPTLWETQARLLEPRSS	0.1767	19	58	Yes
P010	D	MTO1	chr6	74190042	A	C	SNV	24	AKVIQPDGVLLLLPRLECNGVISAHHNLPL	0.2067	17	35	Yes
P011	A	CCP110	chr16	19562530	G	T	SNV	01	NAPVHRLLSRQGSICSKNPKKAAKC	0.375	14	12	Yes
P011	A	FGF22	chr19	643528	G	-	INDEL	13	HVPGAGQEGGPRPGGRTRRYHLSAHFLPVLVS	0.12	25	24	Yes
P011	A	TLR9	chr3	52257116	C	A	SNV	15	PMLQTLRLQMNFINQSQLGIFRAFPGLRYVD	0.6933	14	58	Yes
P011	A	MTDH	chr8	98673355	G	A	SNV	36	EAVRTPQNVTAKQPPEIDKKN	0.3725	6	0	Yes
P011	B	MS4A8	chr11	60482829	C	-	INDEL	09	SKHLCSKPSDHPEPVTSPPS	0.335	9	0	Yes
P011	B	MIA2	chr14	39717126	G	A	SNV	19	KTDKSDTIPYLKKFLYNFDN	0.4875	10	10	Yes
P011	B	AATF	chr17	35306477	C	G	SNV	24	GPQPLALQLEQLLNPGPSEADP	0.345	5	22	Yes
P011	B	PRODH	chr22	18908866	GGACTACCAAGTGCTT	-	INDEL	31	LDWSSLIDSRTKLSPTHRQ	0.31	1	1	Yes
P011	C	ITGAL	chr16	30486657	C	A	SNV	06	NGVIVGAPGEGKSTGSLYQCQS	0.5267	5	0	Yes
P011	C	PRODH	chr22	18908866	GGACTACCAAGTGCTT	-	INDEL	23	RQDSWSPCCPGSLRRRSYR	0.31	2	19	Yes
P011	C	EREG	chr4	75246742	G	C	SNV	32	PGESSDNCTALVQTEHNPRVAQVSI	0.3025	14	15	Yes
P011	C	GRIK2	chr6	102516258	A	T	SNV	35	QLEKRSFCSAMVEELRLSLKCQRRLKHKPQA	0.3375	14	54	Yes
P011	D	CCP110	chr16	19562530	G	T	SNV	08	PNRVPVSGVYAVKIQRKRPNVATI	0.375	16	24	Yes
P011	D	LY75	chr2	160746753	T	C		14	AYVSCQNQGADLLSISSAAELTYLKEKEGIAK	0.4925	32	40	Yes
P011	E	SYB	chr8	110587940	-	A	INDEL	37	GSLRDELCLDFPCDFPREELNPQPPS	0.11	17	18	Yes
P012	A	MDGA2	chr14	47812207	G	T	SNV	01	GSAACFSHSVADSHEVAFCQAKLPFLPPT	0.24	17	25	Yes
P012	A	PRKD3	chr2	37483861	ATTTGGTC	-	INDEL	10	KKSGTFPFNEDEDINPKCCIYVPTKSMERNFW	0.1	25	26	Yes
P012	A	BMPR1B	chr4	96035947	C	G	SNV	11	DDSGLPVVTSGCLGVEGSDFQCRKKK	0.2425	5	6	Yes
P012	A	SHROOM1	chr5	132161294	G	A	SNV	16	MSLPARLRPTVPARPLATHPRSASLSHPG	0.385	10	21	Yes
P012	A	FAM47A	chrX	34149473	G	T	SNV	25	KFCPRPFENPLSHLR	0.1867	9	1	Yes
P012	B	TP53	chr17	7578535	T	A	SNV	02B	GTAKSVTCTYSPALNMMFCQLAKTCPVQLWVKKK	0.36	26	58	Yes
P012	B	RAB3GAP1	chr2	135908033	G	T	SNV	04	GTSAEGAHLRALMQSACLLSDMESFKA	0.1825	14	41	Yes
P012	B	ZNF280A	chr22	22868414	T	C	SNV	17	SSGMASVIVSNTGPQSSPVKTKK	0.18	10	7	Yes
P012	B	ABCC5	chr3	183667631	G	T	SNV	18	VSRVLIRELKRLDNIKQSPFLSHITSSIQGL	0.18	9	48	Yes
P012	B	LDOC1	chrX	140270830	T	C	SNV	21	KKKKKKKDSPILGDYRAFLDEMRQCFGWDDDED	0.3125	13	30	Yes
P012	C	RALGAPB	chr20	37144977	A	-	INDEL	08	KHLPQIFFRACVESAVWWMHSKKK	0.12	21	30	Yes
P012	C	KNG1	chr3	186443016	C	G	SNV	12	GIQYFNNNTQHSSLLTLNEVKRAQRQDTGE	0.18	20	47	Yes
P012	C	MMRN1	chr4	90848981	C	A	SNV	19	MQKMTDQVNYKAMKLTLLQKKIDNIS	0.235	15	37	Yes
P012	C	DDX60	chr4	169157430	A	C	SNV	20	AHLFGRRYFPPKFQEAHFEFYQSKVFLDDL	0.18	12	56	Yes
P012	C	SP26	chrX	132159778	T	C	SNV	24	RNDDKGDHTCRLISVVSHLGKTLKS	0.2775	9	22	Yes
P013	C	SP4	chr7	21468306	G	A	SNV	05	SDQKKKEEEEAAAAAAMATEGKKK	0.045	1	18	No
P013	A	SMAP2	chr1	40878733	-	A	INDEL	07	KWKRGSEPVPEKKIG	0.06	5	1	Yes
P013	A	SDE2	chr1	226175664	T	G	SNV	11	TEERTDGERVAAVAPEERENVAVAKKKK	0.1775	5	31	Yes
P013	A	ABCC10	chr6	43400685	GG	-	INDEL	14	GQEPLSHPALCSGASRWGCAG	0.195	1	11	Yes
P013	A	HSP90AB1	chr6	44221316	G	A	SNV	16	GDEDASHMEEVKKKK	0.075	2	1	Yes
P013	A	RBMX	chrX	135958730	C	A	SNV	04	RGPPPRSVGPPPKRSAA	0.0567	10	1	Yes
P013	B	MINK1	chr17	4793851	G	A	SNV	08	RKQLEEQRQSKRLQRQLQQEHAYLK	0.2	10	7	Yes
P013	B	OGFR	chr20	61444637	G	C	SNV	10	EPAETPSETPGPRPKK	0.1	3	1	Yes
P013	B	LK4	chr3	41860984	-	T	INDEL	12	KGELIYLVATQEEKKKEP	0.06	1	7	Yes
P013	B	PQBP1	chrX	48759668	AG	-	INDEL	15	KVDRERARQGTGSGPRV	0.07	5	1	Yes
P013	B	RBMX	chrX	135960230	C	T	SNV	01	KSLDGKTIKVEQATKP	0.13	10	1	Yes
P013	C	ATP7B	chr13	52549264	G	T	SNV	09	RKILSKLSLPTRAWEQAMKKSFAFDNVGYE	0.2975	19	20	Yes
P013	C	SIGLEC10	chr19	51920196	G	T	SNV	17	NFMNDGFFLKVTALTKKPDVYI	0.04	14	23	Yes
P013	C	CNOT3	chr19	54649666	-	C	INDEL	18	LDLEDIPQALVATSPSQPQPHGKK	0.05	10	12	Yes
P013	C	NT5C3A	chr7	33054388	T	C	SNV	19	KYMDSYDIVLVQGESLEVANSILQKILKK	0.11	7	41	Yes
P014	A	ESPN	chr1	6517242	AGG	-	INDEL	03	EEEQRRKRRRRRPGWPACPPGGGTSCGRSW	0.06	18	30	Yes
P014	A	NBPF10	chr1	145323690	A	G	SNV	10	EEEEDQGPPCPRLSRELLEVVAKKKKK	0.11	8	3	Yes
P014	A	HNRNPH1	chr5	179046317	T	A	SNV	18	GRSTGEAFVQFASQDIAEKALKKHKERIG	0.06	5	41	Yes
P014	A	R NX2	chr6	45296445	-	A	INDEL	23	TRPHRQPQLPVLGAALALALQQDPARGL	0.05	26	51	Yes
P014	A	R NX2	chr6	45296445	-	A	INDEL	26	YLKKKRRDYGIKQPLQHSDTMSAKLLLGS	0.05	15	58	Yes
P014	B	ESPN	chr1	6517242	AGG	-	INDEL	05	PACPPGGGTSCGRSWKKRGSRSGKRRSD	0.06	10	37	Yes
P014	B	VRK3	chr19	50510991	A	C	SNV	08	RKSPQVTRGSPQKTSGSPQKT	0.08	1	18	Yes
P014	B	R NX2	chr6	45296445	-	A	INDEL	11	GLQGGSPRRGTRWDCGYCHGG	0.05	8	6	Yes
P014	B	R NX2	chr6	45296445	-	A	INDEL	24	KLLLGSEHQPALQPPLQQPAARQNERREPG	0.05	1	23	Yes
P014	B	RPGR	chrX	38146456	T	C	SNV	27	KEGAEDSKGSGIEEQEVEANKKKKK	0.0767	2	18	Yes
P014	C	ESPN	chr1	6517242	AGG	-	INDEL	06	RRSDRSRRSCGGRRNSQRSCGRWATMRAS	0.06	12	4	Yes
P014	C	ZNF607	chr19	38189221	A	C	SNV	12	ECKECGETFSHASHRIIHERIHTSDKPYE	0.08	5	52	Yes
P014	C	R NX2	chr6	45296445	-	A	INDEL	22	VAAAPRQPHHGGDHRRPPGRTRPHRQPQ	0.05	10	2	Yes
P014	C	ABCB8	chr7	150741189	G	C	SNV	25	SALDAESERVLQEALDRASAGRTVLVKK	0.05	9	28	Yes
P014	D	RAF1	chr3	12633229	T	A	SNV	01	ILKVVDPTPEQFQAFWNEVAVLRKTRHVNI	0.0767	15	43	Yes
P014	D	OSMR	chr5	38869210	C	A	SNV	02	TLLSLRTYKSEVLAERLPLTPVSL	0.14	11	34	Yes
P014	D	CYP7B1	chr8	65509203	G	A	SNV	07	IQYPDSDVLFRYKVKF	0.06	1	4	Yes
P014	D	THEM6	chr8	143809193	C	T	SNV	09	KKKRAFYLEARFVSLRDVFVCALLRFRQH	0.785	20	47	Yes
P015	A	SH2D4A	chr8	19250935	T	-	INDEL	01	SIPVVSRTSCLTTWSCLSDSLHQGHPTASK	0.105	30	31	No
P015	B	ADAM21	chr14	70924499	G	A	SNV	06	KLLVSRHLPVFTYTDNRALLEDQLFIPD	0.1775	14	50	No
P015	C	SH2D4A	chr8	19250935	T	-	INDEL	12	MPLQTPTASWAWTSYSMPPWRIWWNITRR	0.105	61	54	No
P015	A	N MA1	chr11	71719812	T	C	SNV	16	GKFQVATDALKSREPRAKPQLDLS	0.205	3	10	Yes
P015	A	KRAS	chr12	25380275	T	G	SNV	17	KKKLLDILDTAGHEEYSAMRDQYMRTGE	0.1633	1	22	Yes
P015	A	SLC35C2	chr20	44979141	C	G	SNV	02	LKALHSRGDGGPKAFKGLGSSPDLELLLRS	0.11	3	22	Yes
P015	A	SH2D4A	chr8	19250935	T	-	INDEL	05	KKHPTASKRAFPWTNATATFMCEAKITLQQ	0.105	38	37	Yes
P015	B	IDH1	chr2	209113113	G	T	SNV	10	IPRLVSGWVKPIIIGSHAYGDQYRATD	0.13	7	34	Yes
P015	B	RCHY1	chr4	76419376	C	T	SNV	15	CGICRIGPKKDFFHCLK	0.185	11	3	Yes
P015	B	TMEM176B	chr7	150490210	TTCTGCCATTGG	-	INDEL	18	PTTGYRWMRRSQEKEECRAYMQMLRKLF	0.09	3	20	Yes
P015	B	SH2D4A	chr8	19250935	T	-	INDEL	03	RIWWNITRRNPSLPWGR SIPVVSRTSC	0.105	34	30	Yes
P015	C	CDCA5	chr11	64847248	G	T	SNV	04	AVQSPRRSPRISFLLEKENEPPGRE	0.18	11	32	Yes
P015	C	AHNAK2	chr14	105412066	C	T	SNV	07	LPKLQMPSFKMPKVDHKGPQIDI	0.16	7	6	Yes
P015	C	BNIP1	chr5	172578611	T	-	INDEL	14	KKKKPVLYQRAFIWTASTFFLS	0.07	10	12	Yes
P015	C	PKHD1	chr6	51609233	G	C	SNV	20	RALGLPPPVCVFPKTEAEWTASFFN	0.1825	17	9	Yes
P015	D	CMAS	chr12	22211625	T	-	INDEL	19	AKRHLIEMGTCRVEKWHTTKCELNIVWIKK	0.13	27	40	Yes
P015	D	FAM86A	chr16	5140182	C	G	SNV	09	VLLNGLSLEADITANLDSPRVTVAQLKK	0.08	8	44	Yes
P016	A	SEC23IP	chr10	121692629	AGAG	-	INDEL	03	KKKFSLFRVTYAIGNLKILLCYYLKKFIEQ	0.38	48	54	Yes
P016	A	TP53	chr17	7578457	C	A	SNV	17	STPPPGTRVLAMAIYKQSQHMTEVV	0.6125	21	38	Yes
P016	A	PPP6R1	chr19	55756911	G	-	INDEL	20	GFLQSTGSLNPLLAASSARSWASSSTARQT	0.33	11	49	Yes
P016	A	EIF2B5	chr3	183856009	G	-	INDEL	27	LRWHNSLQTTLTTKLEMTLCEVKKK	0.14	19	33	Yes
P016	B	HIPK1	chr1	114499802	A	-	INDEL	04	FQNMEICKRRVHMYVQ	0.395	2	7	Yes
P016	B	POSTN	chr13	38154065	C	G	SNV	12	LKELLTQPGDCTLFVPTNDAFKGMTSK	0.5675	8	34	Yes
P016	B	PPP6R1	chr19	55756911	G	-	INDEL	21	SSARSWASSSTARQTSSCPFFGRRMTSWT	0.33	27	37	Yes
P016	B	BTN2A1	chr6	26468777	G	T	SNV	28	EGLTLHRVGTHQSLYNQFLGLTAMK	0.3067	19	38	Yes
P016	C	PPP6R1	chr19	55756911	G	-	INDEL	01	KKKKSTLAPRPSWTS	0.33	4	1	Yes
P016	C	APP	chr21	27484418	-	G	INDEL	14	KPTDGNAGLLAEPQIRHVLWQTEHAHECPE	0.145	18	55	Yes
P016	C	PIK3R1	chr5	67575539	T	A	SNV	22	KKKNPVIPAAVYREMISLAPEVQSSEEY	0.7275	9	40	Yes
P016	C	TRAF3IP2	chr6	111912640	G	A	SNV	24	IRQLERPLLLTSVCYPQDLPRPLR	0.3925	12	32	Yes
P016	D	CAMKK2	chr12	121691141	C	A	SNV	02	VSNEFKGSDALLSNTLGTPAFMAPESLSKK	0.36	12	52	Yes
P016	D	SMCR8	chr17	18219186	A	T	SNV	07	EPYNEPALPVEYSVPLFPFASQGANKKK	0.6475	14	28	Yes
P016	D	PPP6R1	chr19	55756911	G	-	INDEL	19	KKKKKACSPVWSGLS	0.33	2	1	Yes
P016	D	MRPS26	chr20	3027156	A	T	SNV	23	NQAENRRLLELRIARLRQEEREQE	0.4925	9	36	Yes
P016	D	APP	chr21	27484418	-	G	INDEL	25	RHVLWQTEHAHECPEWEVGFRSIRDQNLH	0.145	27	18	Yes
P017	A	HPS1	chr10	100177382	A	G	SNV	04	ALHLSVIPTDLLAQQAGQLARRLWEASR	0.08	10	49	Yes
P017	A	AKAP13	chr15	86077162	-	T	INDEL	08	KKKKKKLFFLMGLLFYGHHIQVFHRGCVNL	0.06	32	42	Yes
P017	A	AC092964.1	chr3	172034980	T	-	INDEL	16	ALSPRLECSGHSLGSLQRLPGASNSPASAS	0.06	11	39	Yes
P017	A	SP53	chr4	120212365	A	C	SNV	18	AGYKSPEFHPESHLQIKNHLI	0.16	6	9	Yes
P017	A	BEND3	chr6	107390054	G	A	SNV	26	NKKQLDPTRLRLICHYVEAVYPVEKMEEV	0.165	19	55	Yes
P017	B	METTL12	chr11	62433991	T	C	SNV	03	KKFFGYDEVQGLPLPLLQEAQAASPLRV	0.0767	12	39	Yes
P017	B	AKAP13	chr15	86077162	-	T	INDEL	07	KKYGHHIQVFHRGCVNLRITVGKWPQWHLF	0.06	29	58	Yes
P017	B	PHKB	chr16	47723069	G	T	SNV	09	LSPSEVKQLLLDILHPQQNGRCWLNRRQID	0.1675	18	41	Yes
P017	B	MMP16	chr8	89053886	G	A	SNV	19	RVKEGYSPPDDVDIVIKK	0.1033	6	1	Yes
P017	C	TPP2	chr13	103328650	T	C	SNV	02	KWTDLFDNKVSTFAYKHALVNKMYGR	0.07	11	34	Yes
P017	C	NGDN	chr14	23946435	T	C	SNV	06	HRINYEESMMARLSVSKREKGRRKRA	0.0767	13	44	Yes
P017	C	AGO2	chr8	141595330	C	T	SNV	10	PPRPDFGTSRRTIKLQANFFEMDIP	0.07	3	37	Yes
P017	C	TFE3	chrX	48889007	G	A	SNV	11	RWNKGTILKASVDYICKLQKEQQRSKDLES	0.1267	12	54	Yes
P017	C	PGK1	chrX	77378386	T	G	SNV	13	ADKIQLINNMLDKVKEMIIGGGMAFTFLKV	0.18	9	52	Yes
P018	D	TAF2	chr8	120801888	C	A	SNV	03	SHMWSQMLVSTSGFFKSISNVSGKDIQPLI	0.2625	10	56	No
P018	D	NOTCH1	chr9	139400209	C	-	INDEL	08	NSTGSCATSWTTASGVGPGATS	0.13	11	7	No
P018	A	RIF1	chr2	152311442	A	C	SNV	14	PQRPSDWSKKTNEPLGKLTSLFKLIV	0.12	7	10	Yes
P018	A	M C4	chr3	195508393	A	G	SNV	21	VTDTSSASTGHATPLPVTGLSS	0.18	10	7	Yes
P018	A	PIK3R1	chr5	67589588	-	A	INDEL	22	VKEDNIEAVGKKLHEI	0.27	1	2	Yes
P018	A	BCLAF1	chr6	136594292	T	C	SNV	01	HHVKEQYFKSAAMTLSERFTSYQKATEE	0.115	15	38	Yes
P018	A	NOTCH1	chr9	139400209	C	-	INDEL	12	VSPHPRAPSTVACAPPNSTGSCA	0.13	9	2	Yes
P018	B	ACVR2A	chr2	148677910	-	C	INDEL	26	KSAGDTHGPGWYPEVHGSRGIRGCYKLPK	0.1	21	15	Yes
P018	B	ACVR2A	chr2	148677910	-	C	INDEL	27	SRGIRGCYKLPKGCIFEDRYVCHGISPMGT	0.1	27	35	Yes
P018	B	SOWAHB	chr4	77818548	T	C	SNV	28	RAADAACNGLPGSGSRRAPGKG	0.52	1	22	Yes
P018	B	XPO5	chr6	43538244	G	T	SNV	02	SFLLNTLQENVNKYQKVKTDTSQESKA	0.11	3	18	Yes
P018	B	NOTCH1	chr9	139400209	C	-	INDEL	05	TCLCLGPFTAPNASSRPAAP	0.13	12	20	Yes
P018	C	PBX1	chr1	164781235	C	G	SNV	09	ELAKKCGITVSQVSKWFGNKRIRYKKNIG	0.2325	6	35	Yes
P018	C	FH	chr1	241682991	G	C	SNV	13	YRALRLLARWRPLVRAPAAALASAPKK	0.2825	13	40	Yes
P018	C	TAF1C	chr16	84213650	-	G	INDEL	20	AEGASVPRLAGPPPV QDRLPPCISSAGA	0.13	11	37	Yes
P018	C	M C4	chr3	195508265	T	A	SNV	04	KDISSASTGQATPLPVSNTSSVST	0.1667	5	18	Yes
P018	C	NOTCH1	chr9	139400209	C	-	INDEL	06	ASSRPAAPAWAATPATTRGPVSPH	0.13	5	24	Yes
P018	D	MGA	chr15	42005513	GAAAA	-	INDEL	15	RRPDCMFGCTCLKSCTC	0.23	6	3	Yes
P018	D	ACVR2A	chr2	148677910	-	C	INDEL	24	FEDRYVCHGISPMGTGFSLYC	0.1	21	30	Yes
P018	D	CAND2	chr3	12858436	C	G	SNV	29	LHILASFLRKNQRALGLATLAALDALAQSQG	0.11	13	58	Yes
P019	B	BE2S	chr19	55915721	C	T	SNV	04	YFLTKIFHPNVGANGKICVNVLKRDWTAEL	0.117	11	4	No
P019	A	PPP6R3	chr11	68367856	G	A	SNV	06	KKNWSANFDVPMETTHSAPLDSVG	0.107	9	5	Yes
P019	A	MPZL2	chr11	118133218	TGGCAGGTGTA	-	INDEL	12	KKKSILLWKLQFDDNGTGEEPT	0.135	1	3	Yes
P019	A	MLXIP	chr12	122618364	G	A	SNV	16	GLVITTHHPAPSAAPYGLALSPVTRPPQPR	0.265	7	46	Yes
P019	A	NCOR2	chr12	124810745	G	A	SNV	19	LTNRVWEDRPLSAGSTPFPYNPLI	0.32	8	10	Yes
P019	A	EIF3J	chr15	44843703	G	A	SNV	01	ERQQKKRQKEIKKRLE	0.097	3	0	Yes
P019	B	ZNF48	chr16	30409982	C	A	SNV	03	CGKGFRRSSDLVKHHSVHTGEKPY	0.198	9	15	Yes
P019	B	TP53	chr17	7578528	A	C	SNV	13	KSVTCTYSPALNKMLCQLAKTCPVQLWVDS	0.497	13	56	Yes
P019	B	BRD4	chr19	15349706	GCT	-	INDEL	14	RRRQEQQQQRQEQKK	0.054	4	0	Yes
P019	B	TFPI	chr2	188332651	C	T	SNV	20	TPQSTKVPSLFEFHSPSWCLTPADR	0.087	22	29	Yes
P020	A	YBX1	chr1	43166460	C	T	SNV	06	QNMYRGYRPRFRRGPLRQRQPREDG	0.18	11	34	Yes
P020	A	STXBP3	chr1	109315323	T	A	SNV	14	HESQVYTLDVPDAFYYSYSPDPGNAKGKK	0.136667	8	17	Yes
P020	A	ERF	chr19	42753002	G	A	SNV	17	KAGGLAEGAGALAPPPLPPQIKVEPI	0.15	6	28	Yes
P020	A	ARFGEF3	chr6	138617948	A	-	INDEL	18	HSVTDTVDYSLAMPGSK	0.23	0	8	Yes
P020	B	BCL9L	chr11	118779326	G	A	SNV	07	LPHPRRREAPGSLPLSPRGHCPP	0.103333	6	25	Yes
P020	B	GNAS	chr20	57415807	C	T	SNV	12	ESKEPKEEKQWRRCKPKKPTRRDAS	0.1875	9	18	Yes
P020	B	CAMK2D	chr4	114468842	TG	-	INDEL	21	KKADASHCIQQILEAATLPSDGRGPSGPEA	0.225	6	45	Yes
P021	A	VPS13C	chr15	62234073	A	G	SNV	02	VSPNAVIADPGLIRVENKFSLVPMEH	0.1633	5	16	No
P021	A	MIB1	chr18	19345847	G	T	SNV	07	KKKKNYDLCTVCYHVDKHHLRHRFYRITTP	0.05	13	34	No
P021	A	BRD3	chr9	136918529	G	-	INDEL	09	TPGPVNPPPRRSPTPASPAARPTSCSTCR	0.11	1	12	No
P021	B	ZAN	chr7	100386847	A	G	SNV	19	YKVQLQAGLELVVNSQKMAVPYRPNEHLRV	0.3967	9	40	No
P021	B	C9orf3	chr9	97690750	G	T	SNV	21	YEAREQQELRAFLRWRRLQDEMQCSP	0.11	10	38	No
P021	C	CPNE8	chr12	39154676	T	A	SNV	03	KKLCNGDYDRTIKVVVYDWDRDG	0.06	9	2	No
P021	C	COMMD2	chr3	32806558	-	T	INDEL	10	KQDSVFVLGFSEELKQIVASALSGQQKRDQ	0.335	8	49	No
P021	C	AASS	chr7	121738625	C	T	SNV	12	RDGNIEITVGSNMKNQIEQLGKK	0.0633	4	2	No
P021	A	NBPF14	chr1	148011037	C	G	SNV	18	PRLSRELLHEKGPEVLQDSL	0.06	12	8	Yes
P021	A	EGFR	chr7	55242465	GGAATTAAGAGAAGC	-	INDEL	04	KVKIPVAIKTSPKANKE	0.415	1	1	Yes
P021	B	ZDHHC5	chr11	57466073	G	A	SNV	05	SLKEPTSIAKSSRHPSYRS	0.0667	10	1	Yes
P021	B	DYNC1I2	chr2	73631166	-	TA	INDEL	11	KRKEEERKKKRNRPEEGSC	0.06	1	1	Yes
P021	C	PCSK7	chr11	117079626	G	C	SNV	13	KKLFCPSGMMSLIGAPGSMDSDPNG	0.09	9	20	Yes
P021	C	PPP1R13L	chr19	45898793	G	T	SNV	17	QTQSKPQPQLPPQPQT	0.2575	5	1	Yes
P022	A	TP53	chr17	7578539	TGAGGGCAGGGGAGTAC	-	INDEL	07	KGFLHSGTAKSVTCTTRCFANWPRPAL	0.265	29	20	No
P022	A	CPE	chr4	166300442	GGGCGCCGAAGCCCAGGAGCCCG	-	INDEL	11	KKALAACGWLLGARGGHEAAPAA	0.1	7	7	No
P022	A	EMC2	chr8	109455907	T	C	SNV	13	MAKVSEPYDVTWEEMRDKM	0.1975	10	4	No
P022	B	TP53	chr17	7578539	TGAGGGCAGGGGAGTAC	-	INDEL	21	ALCSCGLIPHPRPAPASAPWPSTSSHST	0.265	1	32	No
P022	B	CPE	chr4	166300442	GGGCGCCGAAGCCCAGGAGCCCG	-	INDEL	08	EAAPAAAARGRHLLRVPPLPRAA	0.1	19	36	No
P022	C	FOXO1	chr13	41134571	C	T	SNV	09	GDVHSMVYPPSATKMASTLPSLSEISNP	0.163333	19	47	No
P022	C	CPE	chr4	166300442	GGGCGCCGAAGCCCAGGAGCCCG	-	INDEL	16	PRAARGARVRVAAVHRHQQDLH	0.1	19	29	No
P022	C	TRERF1	chr6	42211081	CCACCGTC	-	INDEL	22	HAAGAETPDTPGRNHRRLCDK	0.105	28	58	No
P022	D	APC	chr5	112175202	T	-	INDEL	05	TTQEADSANTLQKQK	0.1	2	50	No
P022	D	SQSTM1	chr5	179248085	G	A	SNV	12	AAGPGPCERLLSQVAALFPALRPGGFQA	0.38	14	43	No
P022	D	TRERF1	chr6	42211081	CCACCGTC	-	INDEL	19	SKDFIFVQKMVKSNSVRGVLLHVEKDHAA	0.105	28	58	No
P022	A	WSB1	chr17	25639273	C	T	SNV	23	GTHDGSVYFWATPWQVPSLQHLCRMSIRR	0.1525	29	38	Yes
P022	B	PRRC2C	chr1	171505315	G	C	SNV	02	HRPLYQPMQPHPQHLPSMGFDPRWLMMQSY	0.245	8	19	Yes
P022	B	B D13	chr11	116633758	C	A	SNV	10	ARHDSDTSPPRRIRHYSSDTSPPRRARH	0.11	14	28	Yes
P022	C	HAGH	chr16	1869983	T	A	SNV	18	HAGGNEKLVMLESGLKVYGGDDR	0.3125	12	26	Yes
P022	D	GCAT	chr22	38204072	G	A	SNV	20	RRAQSALAQLRGILEEELEGICGAK	0.24	3	37	Yes
P022	D	CPE	chr4	166300442	GGGCGCCGAAGCCCAGGAGCCCG	-	INDEL	24	QQDLHGGAQLRGPGAPGHRAVRQPWRP	0.1	2	11	Yes

## Sheet: Supplementary Table S8
Supplementary Table S8. The best response of each peptide/peptide pool for all 21 patients
Patient ID	Experimental control / ID Number of peptide	IFN-γ spots	IFN-γ spots per 105 PBMCs	Response
P001	Positive control	56	37.3333	/
		50	33.3333
	Negative control	0	0	/
		0	0
	07, 08, 09	1	0.666667	Negative
		1	0.666667
	04, 05, 06	32	21.3333	Medium Positive
		39	26
	10, 11, 12	65	43.3333	Medium Positive
		42	28
	16, 17, 18	2	1.33333	Negative
		5	3.33333
	25, 27, 28B	6	2.4	Negative
		7	2.8
	31, 33, 34	36	24	Medium Positive
		48	32
P002	Positive control	236	118	/
		224	112
	Negative control	0	0	/
		2	1
	02, 05, 06	37	18.5	Medium Positive
		26	13
	08, 09, 10	16	8	Weak Positive
		19	9.5
	11, 14, 17	27	13.5	Medium Positive
		35	17.5
	19, 20, 28	24	12	Medium Positive
		25	12.5
	29, 30	26	13	Medium Positive
		23	11.5
P003	Positive control	1022	340.667	/
		1079	359.667
	Negative control	3	1	/
	02, 03, 04	247	82.3333	Strong Positive
		289	96.3333
	05, 06, 07B	186	62	Strong Positive
		240	80
	14, 15, 16	319	106.333	Strong Positive
		356	118.667
	37, 50	348	116	Strong Positive
		394	131.333
P004	Positive control	212	106	/
		212	106
	Negative control	52	26	/
		73	36.5
	02B, 04, 05B	318	159	Strong Positive
		337	168.5
	10B, 13, 14	274	137	Strong Positive
		328	164
	17B, 23B, 48	197	98.5	Strong Positive
		279	139.5
	56, 57, 58	232	116	Strong Positive
		262	131
	59, 60, 61	187	93.5	Strong Positive
		230	115
	63, 64	269	134.5	Strong Positive
		371	185.5
P005	Positive control	201	100.5	/
		225	112.5
	Negative control	4	2	/
		3	1.5
	1	18	9	Weak Positive
		13	6.5
	2	13	6.5	Weak Positive
		21	10.5
	3	26	13	Medium Positive
		48	24
	4	13	6.5	Weak Positive
		15	7.5
	7	39	19.5	Medium Positive
		17	8.5
	8B	26	13	Medium Positive
		50	25
	12	26	13	Weak Positive
		11	5.5
	8B-wild-type	3	1.5	Negative
		4	2
P006	Positive control	833	277.667	/
		815	271.667
	Negative control	1	0.333333	/
		1	0.333333
	01, 02, 06	14	4.66667	Weak Positive
		20	6.66667
	10, 11B, 12	17	5.66667	Weak Positive
		13	4.33333
	24, 26, 27	16	5.33333	Weak Positive
		13	4.33333
	29, 30	17	5.66667	Weak Positive
		12	4
P007	Positive control	62	31	/
		59	29.5
	Negative control	4	2	/
		0	0
	01, 03	10	5	Weak Positive
		11	5.5
	04, 08	12	6	Weak Positive
		9	4.5
	10, 12	10	5	Weak Positive
		12	6
	13, 14	10	5	Weak Positive
		11	5.5
	16, 21	18	9	Weak Positive
		5	2.5
	22, 23	12	6	Weak Positive
		11	5.5
	24, 25	12	6	Weak Positive
		9	4.5
P008	Positive control	94	47	/
		55	27.5
	Negative control	8	4	/
		17	8.5
	02, 03, 05	658	219.333	Strong Positive
		621	207
	13, 14, 21	649	216.333	Strong Positive
		649	216.333
	24, 25, 26	615	205	Strong Positive
		623	207.667
	27, 28, 29	624	208	Strong Positive
		666	222
	31, 32, 33	667	222.333	Strong Positive
		644	214.667
P009	Positive control	450	225	/
		558	279
	Negative control	1	0.5	/
		1	0.5
	01, 02, 03	39	19.5	Medium Positive
		33	16.5
	04, 05, 06	61	30.5	Medium Positive
		32	16
	13, 14, 15	103	51.5	Medium Positive
		83	41.5
	16, 17	78	39	Medium Positive
		35	17.5
P010	Positive control	156	78	/
	Negative control	3	1.5	/
	2	11	5.5	Weak Positive
		13	6.5
	4	2	1	Negative
		3	1.5
	5	12	6	Weak Positive
		11	5.5
	7	14	7	Weak Positive
		12	6
	12	11	5.5	Weak Positive
		13	6.5
	14	1	0.5	Negative
		3	1.5
	16	14	7	Weak Positive
		9	4.5
	18	9	4.5	Weak Positive
		14	7
	19	1	0.5	Negative
		1	0.5
	21	15	7.5	Weak Positive
		8	4
	22	2	1	Negative
		1	0.5
	25	14	7	Weak Positive
		9	4.5
	26	4	2	Negative
		1	0.5
P011	Positive control	1734	693.6	/
		1738	695.2
	Negative control	3	1.2	/
	01, 06, 08	5	2	Negative
	09, 13, 14	5	2	Negative
	15, 19, 23	7	2.8	Negative
	24, 31, 32	0	0	Negative
	35, 36, 37	2	0.8	Negative
P012	Positive control	759	379.5	/
		816	408
	Negative control	0	0	/
		0	0
	01, 02B, 04	122	48.8	Strong Positive
		156	62.4
	08, 10, 11	112	44.8	Medium Positive
		101	40.4
	12, 16, 17	101	40.4	Medium Positive
		65	26
	18, 19, 20	127	50.8	Medium Positive
		93	37.2
	21, 24, 25	116	46.4	Medium Positive
		59	23.6
P013	Positive control	53	26.5	/
		50	25
	Negative control	3	1.5	/
		2	1
	1	10	5	Weak Positive
		12	6
	4	13	6.5	Weak Positive
		10	5
	5	12	6	Weak Positive
		10	5
	7	12	6	Weak Positive
		10	5
	8	11	5.5	Weak Positive
		11	5.5
	9	15	7.5	Weak Positive
		16	8
	10	14	7	Weak Positive
		9	4.5
	11	13	6.5	Weak Positive
		9	4.5
	12	16	8	Weak Positive
		10	5
	14	14	7	Weak Positive
		13	6.5
	15	19	9.5	Weak Positive
		13	6.5
	16	18	9	Weak Positive
		14	7
	17	13	6.5	Weak Positive
		14	7
	19	15	7.5	Weak Positive
		19	9.5
P015	Positive control	857	428.5	/
		789	394.5
	Negative control	3	1.5	/
		5	2.5
	1	20	10	Weak Positive
		22	11
	2	19	9.5	Weak Positive
		20	10
	3	13	6.5	Weak Positive
		12	6
	4	25	12.5	Weak Positive
		17	8.5
	6	26	13	Weak Positive
		14	7
	7	17	8.5	Weak Positive
		12	6
	9	30	15	Weak Positive
		19	9.5
	10	14	7	Weak Positive
		11	5.5
	12	11	5.5	Weak Positive
		14	7
	15	11	5.5	Weak Positive
		19	9.5
	16	12	6	Weak Positive
		13	6.5
	18	14	7	Weak Positive
		25	12.5
	19	14	7	Weak Positive
		23	11.5
	20	14	7	Weak Positive
		16	8
P016	Positive control	1123	561.5	/
		1103	551.5
	Negative control	3	1.5	/
		2	1
	1	2	0.606061	Negative
		3	0.909091
	2	1	0.30303	Negative
		0	0
	3	2	0.606061	Negative
		1	0.30303
	4	0	0	Negative
		1	0.30303
	7	1	0.30303	Negative
		1	0.30303
	12	0	0	Negative
		0	0
	14	2	0.606061	Negative
		1	0.30303
	17	3	0.909091	Negative
		0	0
	19	1	0.30303	Negative
		0	0
	20	1	0.30303	Negative
		0	0
	21	1	0.30303	Negative
		3	0.909091
	22	2	0.606061	Negative
		2	0.606061
	23	0	0	Negative
		1	0.30303
	24	1	0.30303	Negative
		0	0
	25	1	0.30303	Negative
		3	0.909091
	27	2	0.606061	Negative
		1	0.30303
	28	2	0.606061	Negative
		0	0
P017	Positive control	188	94	/
	Negative control	25	7.57576	/
	2	46	13.9394	Weak Positive
		44	13.3333
	3	50	15.1515	Weak Positive
		48	14.5455
	4	42	12.7273	Weak Positive
		36	10.9091
	6	38	11.5152	Weak Positive
		41	12.4242
	7	45	13.6364	Weak Positive
		34	10.303
	8	43	13.0303	Weak Positive
		36	10.9091
	9	45	13.6364	Weak Positive
		55	16.6667
	10	28	8.48485	Negative
		19	5.75758
	11	48	14.5455	Weak Positive
		55	16.6667
	13	28	8.48485	Weak Positive
		52	15.7576
	16	18	5.45455	Negative
		26	7.87879
	18	21	6.36364	Negative
		37	11.2121
	19	33	10	Weak Positive
		46	13.9394
	26	47	14.2424	Weak Positive
		41	12.4242
P018	Positive control	1114	557	/
		1103	551.5
	Negative control	1	0.5	/
		0	0
	1	6	3	Weak Positive
		14	7
	2	7	3.5	Weak Positive
		11	5.5
	3	13	6.5	Weak Positive
		16	8
	5	10	5	Weak Positive
		8	4
	6	11	5.5	Weak Positive
		9	4.5
	8	8	4	Weak Positive
		11	5.5
	9	10	5	Weak Positive
		8	4
	12	11	5.5	Weak Positive
		9	4.5
	13	12	6	Weak Positive
		9	4.5
	14	10	5	Weak Positive
		9	4.5
	20	8	4	Weak Positive
		10	5
	21	15	7.5	Weak Positive
		17	8.5
	22	13	6.5	Weak Positive
		16	8
	24	27	13.5	Weak Positive
		11	5.5
	26	7	3.5	Weak Positive
		11	5.5
	27	10	5	Weak Positive
		8	4
	28	8	4	Weak Positive
		11	5.5
	29	16	8	Weak Positive
		19	9.5
P019	Positive control	761	380.5	/
		681	340.5
	Negative control	33	16.5	/
		40	20
	3	101	50.5	Medium Positive
		105	52.5
	4	70	35	Medium Positive
		63	31.5
	6	83	41.5	Medium Positive
		89	44.5
	12	64	32	Medium Positive
		58	29
	13	62	31	Medium Positive
		77	38.5
	14	71	35.5	Medium Positive
		50	25
	16	65	32.5	Medium Positive
		65	32.5
	19	50	25	Negative
		38	19
	20	72	36	Medium Positive
		88	44
	3-wild-type	35	17.5	Negative
		38	19
P020	Positive control	238	119	/
		240	120
	Negative control	5	2.5	/
		2	1
	6	8	4	Weak Positive
		16	8
	7	178	89	Strong Positive
		175	87.5
	12	78	39	Strong Positive
		132	66
	14	17	8.5	Weak Positive
		18	9
	17	25	12.5	Weak Positive
		18	9
	18	129	64.5	Medium Positive
		20	10
	21	20	10	Weak Positive
		10	5
	7-Wild Type	4	2	Negative
		3	1.5
	12-Wild Type	3	1.5	Negative
		5	2.5
P021	Positive control	223	111.5	/
		269	134.5
	Negative control	3	1.5	/
		2	1
	2	12	6	Weak Positive
		13	6.5
	5	10	5	Weak Positive
		12	6
	11	8	4	Weak Positive
		14	7
	12	10	5	Weak Positive
		16	8
	18	10	5	Weak Positive
		12	6
	19	10	5	Weak Positive
		12	6
P022	Positive control	136	68	/
		140	70
	Negative control	7	3.5	/
		6	3
	5	38	19	Medium Positive
		18	9
	9	154	77	Strong Positive
		96	48
	10	37	18.5	Medium Positive
		42	21
	13	16	8	Weak Positive
		18	9
	16	15	7.5	Weak Positive
		20	10
	24	115	57.5	Strong Positive
		122	61
	9-wild-type	7	3.5	Negative
		9	4.5
	24-wild-type	6	3	Negative
		8	4

## Sheet: Supplementary Table S9
Supplementary Table S9. Proportion of all TCR clones abundance that are in top 0.5% during the treatment
Patient ID	CDR3 AA Squence	Clone Frequency (%)
		Baseline	Post vaccination timepoint 1	Post vaccination timepoint 2	Post vaccination timepoint 3	Post vaccination timepoint 4	Post vaccination timepoint 5	Post vaccination timepoint 6
P001	CASSFSQVLNEQFF	1.69	0.91	0.25	1.59	2.36	-	-
P001	CSANHPTSFYNEQFF	0	1.09	0	0	0	-	-
P001	CASARRTGENTGELFF	0	0.01	1.01	0	0	-	-
P001	CASSPEIYRDESYNEQFF	0.4	0	0	0.45	0.96	-	-
P001	CASSLQENTEAFF	0.56	1.15	0.45	0.46	0.7	-	-
P001	CASSAPGTHDQETQYF	0.02	0.3	0.55	0.03	0.03	-	-
P001	CASRGGSYEQYF	1.22	2.03	0.39	1.17	0.88	-	-
P001	CASSHGTSNEQFF	5	2.64	1.1	3.28	2.61	-	-
P001	CASSRQRTETQYF	0	1.03	0	0	0	-	-
P001	CAISDVVNEQFF	0.72	0.77	0.13	0.6	0.53	-	-
P001	CASSQENRGSCEQYF	0.18	1.34	0.61	0.25	0.13	-	-
P001	CASSPTDPPAITDTQYF	0.54	0	0.02	0.17	0.02	-	-
P001	CASSLTVNEKLFF	0.52	0.5	0.13	0.64	0.74	-	-
P001	CASVQRRSSYEQYF	0.29	0	0.64	0.31	0.24	-	-
P001	CASSYTWTGSPAFF	8.34	12.12	7.56	5.29	2.53	-	-
P001	CASTLTSGSSYEQYF	0.02	0.21	1.41	0.01	0.01	-	-
P001	CASSFLNNEQFF	0.39	1.34	0.66	0.34	0.34	-	-
P001	CASSSGEDEQFF	0.25	0.01	0.9	0.28	0.17	-	-
P001	CASSARLVSDTQYF	0.74	0.34	0.26	0.6	0.8	-	-
P001	CSASGFGSRGNTEAFF	0.23	0.13	0.35	0.2	0.61	-	-
P001	CASSYQTGGSFGAFF	0.01	0.01	4.54	0.01	0	-	-
P001	CASKIGGDGYTF	0.04	0.01	0.84	0.01	0.01	-	-
P001	CASSQDLAGVNTEAFF	0	0	0.98	0	0	-	-
P001	CASSFYINSYEQYF	0.1	0.69	0.15	0.15	0.12	-	-
P001	CASTDRFTDTQYF	0	0	0.58	0	0	-	-
P001	CASSPAPGNEQFF	1.75	0.49	0.43	1.56	1.81	-	-
P001	CAISDLPGGSNQPQHF	0.01	0	0.58	0	0	-	-
P001	CASSSPDREEEREPDTQYF	0.01	0.01	1.44	0.01	0	-	-
P001	CASSLKGVIGLGSNQPQHF	0.32	0.06	0.86	0.23	0.09	-	-
P001	CASSFTQTPRWDEQYF	5.06	1.12	0.66	3.23	1.42	-	-
P001	CASSEGGGLSETQYF	0.6	0.01	0.01	0.4	0.13	-	-
P001	CASSYSDRNTEAFF	0	0	0.58	0	0	-	-
P001	CASSVEGKTEAFF	0.41	0.78	0.4	0.39	0.24	-	-
P001	CASSFYPGSSYNEQFF	0	0.01	0.63	0	0	-	-
P001	CSARDYRAPSLYSPLHF	0.44	0.42	0.73	0.16	0.24	-	-
P001	CSARVDGRESWEQYF	0	1.01	0	0	0	-	-
P001	CASSLVGTGTGELFF	0.76	0.05	0.08	0.42	0.39	-	-
P001	CASKLSGTSGRNEQFF	12.77	15.13	2.09	15.71	19.17	-	-
P001	CASSLAGQPNEKLFF	0	0	0.67	0	0	-	-
P002	CATSRDAGETQYF	2.7	1.7	2.11	-	-	-	-
P002	CASSLGTGGSYNEQFF	0.55	0.34	0.93	-	-	-	-
P002	CSARDEGDTEAFF	0.78	0.72	0.23	-	-	-	-
P002	CASSQGPASTDTQYF	0.38	0.24	0.9	-	-	-	-
P002	CASSPSPGTGVEQYF	0.28	0.58	0.34	-	-	-	-
P002	CASSFDAGNTEAFF	0.53	0.34	0.59	-	-	-	-
P002	CASSQVQGNPSGEQYF	0	0	0.76	-	-	-	-
P002	CASSQDAADRGSTVQYF	0	3.51	0.67	-	-	-	-
P002	CASSIEGTEAFF	0.2	0.55	0.95	-	-	-	-
P002	CASRGQPGQSYTQYF	0	0.68	0.17	-	-	-	-
P002	CATGDSGYYNEQFF	0	0	0.83	-	-	-	-
P003	CASSWSGSDEQYF	8.11	2.95	2.54	2.44	-	-	-
P003	CATSDPLAAAYEQYF	1.53	0.61	0.65	0.52	-	-	-
P003	CASSLDGKGYTF	0.96	0.32	0.25	0.2	-	-	-
P003	CASSLTSGTGTYEQYF	2.93	1.08	1.14	1.07	-	-	-
P003	CASTWTGGDEQFF	0.53	0.22	0.26	0.23	-	-	-
P003	CASSPPSQGSNTEAFF	1.69	0.56	0.96	0.77	-	-	-
P003	CASSLRVVGGADEQYF	0.82	0.2	0.03	0.02	-	-	-
P003	CASSLARRDTQYF	1.53	0.51	0.6	0.47	-	-	-
P003	CATSAGTGGGDLKNIQYF	0.92	0.34	0.35	0.32	-	-	-
P003	CASSASAWDSPLHF	2.83	1.04	0.89	0.7	-	-	-
P003	CASSTRLAGGTDTQYF	4.02	1.6	1.88	1.85	-	-	-
P003	CASSRRDSSYNEQFF	0.69	0.24	0.29	0.22	-	-	-
P004	CASSWSGSDEQYF	0.53	0	0	0.01	0	0	0
P004	CASSQDSTGAVNEQFF	3.59	0.62	0.74	0.74	1.87	0.94	7
P004	CAWSVGKYGDTQYF	2.02	0.3	0.43	0.96	1.96	1.27	5.25
P004	CASSQGPTYYGYTF	0.56	0.1	0.13	0.14	0.16	0.05	0.3
P005	CASSWSGSDEQYF	0.53	0	0	0.01	0	0	0
P005	CASSQDSTGAVNEQFF	3.59	0.62	0.74	0.74	1.87	0.94	7
P005	CAWSVGKYGDTQYF	2.02	0.3	0.43	0.96	1.96	1.27	5.25
P005	CASSFITEAKNIQYF	0	0.65	0.01	0	0.01	0	0
P005	CASSQGPTYYGYTF	0.56	0.1	0.13	0.14	0.16	0.05	0.3
P006	CASSPDRGVNTEAFF	0.33	0.54	0.6	-	-	-	-
P006	CARSSSGKLGTRNEQFF	0.37	2.87	1.24	-	-	-	-
P006	CASSQEDASGGNTQYF	0.33	0.88	0.76	-	-	-	-
P006	CASSLANWGDTQYF	0.41	0.33	0.55	-	-	-	-
P006	CASSSGDTQYF	0.96	0.27	0.67	-	-	-	-
P006	CASSLEQRARDTQYF	0.53	0.25	0.32	-	-	-	-
P006	CASSLEGADNEQFF	0.75	0.46	0.67	-	-	-	-
P006	CASSYPPSPADF	1.08	0.57	1.14	-	-	-	-
P006	CASSVGSSPDTQYF	0.62	0.85	0.58	-	-	-	-
P006	CASSYQTGAAYGYTF	0.98	1.18	1.52	-	-	-	-
P006	CASKHSSYNEQFF	1.49	3.38	2.13	-	-	-	-
P006	CASSAGQVFF	1.07	1.68	1.53	-	-	-	-
P006	CASSLVGTQETQYF	1	0.76	1.32	-	-	-	-
P006	CSALPTSGGDEQFF	42.57	27.3	33.3	-	-	-	-
P006	CASSQDIAGVNTGELFF	0.7	1.05	1.32	-	-	-	-
P006	CASSFRVGELFF	2.15	3.39	2.22	-	-	-	-
P007	CASSPATGFSLLSSYEQYF	0.7	0.4	0.49	0.58	-	-	-
P007	CASSFGLAGVNEQFF	0.54	0.41	0.52	0.34	-	-	-
P007	CASSGTSGSSYEQYF	1.72	1.58	1.4	1.41	-	-	-
P007	CASSRTLELFF	0.65	0.45	0.39	0.54	-	-	-
P007	CATPDPEQETQYF	0.54	0.47	0.45	0.39	-	-	-
P007	CASSPSGSSGNTIYF	1.29	1.06	1.22	1.06	-	-	-
P007	CASSRDGSSYNEQFF	2.48	2.07	2.49	1.95	-	-	-
P007	CASSAGDRGINSPLHF	0.89	0.55	0.43	0.72	-	-	-
P007	CASSLTSGYNEQFF	5.24	3.57	3.62	2.87	-	-	-
P007	CASAGQGTYEQYF	0.9	0.57	0.52	0.38	-	-	-
P007	CASSDWDSTDTQYF	0.7	0.45	0.34	0.4	-	-	-
P007	CASSFSLAEPRYEQYF	0.55	0.54	0.7	0.34	-	-	-
P007	CASSLTGSLVEQFF	0.57	0.49	0.74	0.51	-	-	-
P007	CASSPGQGEKLFF	1.39	0.61	1.04	0.98	-	-	-
P007	CASRPIRGFYEQYF	1.95	1.57	1.51	1.4	-	-	-
P008	CASSWSGSDEQYF	0.53	0	0	0.01	0	0	0
P008	CASSQDSTGAVNEQFF	3.59	0.62	0.74	0.74	1.87	0.94	7
P008	CAWSVGKYGDTQYF	2.02	0.3	0.43	0.96	1.96	1.27	5.25
P008	CASSFITEAKNIQYF	0	0.65	0.01	0	0.01	0	0
P008	CASSQGPTYYGYTF	0.56	0.1	0.13	0.14	0.16	0.05	0.3
P009	CASSSRLAGGTDTQYF	0.58	0.53	0.52	0.45	0.45	0.47	-
P009	CASSLFTGGEETQYF	0.77	0.7	0.69	0.62	0.6	0.61	-
P009	CASSAWTASTDTQYF	0.82	0.73	0.52	0.56	0.5	0.67	-
P009	CASSSGENQPQHF	0.59	0.65	0.86	0.76	0.55	0.2	-
P009	CASSSRTGAYNEQFF	1.49	1.89	0.87	1.51	0.76	1.59	-
P009	CASSLQGTSAQETQYF	0.49	0.43	0.41	0.36	0.4	0.7	-
P009	CASSSLTGFLNTEAFF	3.41	4.09	3.04	4.15	2.6	4.1	-
P009	CASSLPSDRYNEQFF	0.39	0.38	0.21	0.31	0.2	0.52	-
P009	CSVEEGGLMNTEAFF	7.2	8.78	5.47	6.07	3.22	8.17	-
P009	CASSYSLQGPLRF	1.31	1.3	1.1	1.28	0.91	0.98	-
P009	CASSSPLAENTDTQYF	1.97	1.46	0.86	1.53	1.18	1.91	-
P009	CASSSRLAGGSNEQYF	0.56	0.6	0.61	0.48	0.45	0.37	-
P009	CSASYDSGTQETQYF	0.97	1.21	0.73	1.11	0.74	1.12	-
P009	CSVEGDRGRSETQYF	0.76	0.84	0.37	0.58	0.33	1.03	-
P009	CSAVSDRDFAGELFF	0.78	0.6	0.37	0.46	0.41	0.58	-
P009	CASSSSQADTGELFF	0.49	0.39	0.42	0.37	0.53	0.62	-
P009	CAISTGDSNQPQHF	0.54	0.71	1.04	0.4	0.58	0.26	-
P009	CASSVEVMVSSGNTIYF	1.15	0.84	0.57	0.74	0.68	1.1	-
P009	CSARDYKGAVFTEAFF	0.51	0.36	0.33	0.39	0.36	0.59	-
P009	CASSQGSGGGLNIQYF	1.16	0.93	0.52	0.9	0.69	2.03	-
P009	CASSLQAGANEQFF	4.35	5.28	2.87	4.16	2.82	5.07	-
P009	CASSFLGEQYF	2.63	4.11	2.05	3.04	1.4	3.19	-
P010	CASSLVSGSTYNEQFF	0	0	0	1.47	-	-	-
P010	CASREPGQRQETQYF	0	0	0	1.59	-	-	-
P010	CATSVGAYGYTF	0.7	0.49	0.55	0	-	-	-
P010	CASSLTDRAGEQYF	0.75	0.95	0.83	0	-	-	-
P010	CASSAEQVARGKQYF	1.07	0.87	0.95	0	-	-	-
P010	CASSVGDEQFF	0	0	0	0.53	-	-	-
P010	CASRYGPATEAFF	0.51	0.52	0.37	0	-	-	-
P010	CASSSWTDTGELFF	0.82	0.81	0.81	0	-	-	-
P010	CASSPSFLAGGPTDTQYF	0	0	0	1.33	-	-	-
P010	CASSFGTSSEQYF	0.26	0.38	1.03	0	-	-	-
P010	CASSYSVVGRHNEQFF	0.56	0.77	0.8	0	-	-	-
P010	CASSLEGGVRTQYF	3.26	3.78	3.53	0	-	-	-
P010	CASSLGLGTEAFF	1.19	0.74	0.76	0	-	-	-
P010	CASSPPEGVLDTQYF	0	0	0	0.66	-	-	-
P010	CASSLARGIQTEAFF	0	0	0	0.59	-	-	-
P010	CASSRQGPTYEQYF	0	0	0	2	-	-	-
P010	CASSLDQGYNSPLHF	1.68	2.16	1.89	0	-	-	-
P010	CASSLVAGSYYEQYF	0	0	0	2.02	-	-	-
P010	CSVRTGGETQYF	0	0	0	3.2	-	-	-
P010	CATSDTLWTGESNQPQHF	0	0	0	2.94	-	-	-
P010	CASSQDWGGDTEAFF	3.05	2.76	3.02	0	-	-	-
P010	CATSAPLLAGEDNEQFF	0.92	0.77	0.74	0	-	-	-
P010	CASSDILTGMLEQYF	1.72	1.89	2.49	0	-	-	-
P010	CSAGADNQPQHF	1.45	0.72	0.81	0	-	-	-
P010	CSVGRLEGETQYF	1.64	1.36	1.33	0	-	-	-
P010	CSALPGTALRETQYF	0	0.87	0.02	0	-	-	-
P010	CASNGFRDRVDNEQFF	0	0	0	0.65	-	-	-
P010	CSAAGEKVLDTQYF	3.96	2.54	2.85	0	-	-	-
P011	CASSLETQPSGANVLTF	0.06	0.05	0.01	0.74	-	-	-
P011	CASRSKTDSGTSVHEQYF	0.67	0.67	2.08	1.24	-	-	-
P011	CASSVSSLTPYNEQFF	0.34	0.21	0.68	0.41	-	-	-
P011	CASSPWASTNEKLFF	0.41	0.71	1.04	1.14	-	-	-
P011	CASSYEYEQYF	0.24	0.24	0.55	0.5	-	-	-
P011	CSARDAEGSYNEQFF	0.05	0.16	1.38	0.5	-	-	-
P011	CASRGDSSYEQYF	0.64	0.75	1.02	1.53	-	-	-
P011	CASAGYNTEAFF	2.05	0.92	2.02	0.93	-	-	-
P011	CASSYGNTEAFF	0.86	0.56	1.02	0.89	-	-	-
P011	CAISKTGRETNTDTQYF	0.05	0.96	0.38	0.45	-	-	-
P011	CASRIRLGSGELFF	0.26	0.57	0.67	1.03	-	-	-
P011	CASSFSGSGYGYTF	1.06	1.15	1.93	1.31	-	-	-
P011	CSVPSTRTGSNTEAFF	0.15	0.17	0.59	0.41	-	-	-
P011	CASSQSLAGVFPNEQFF	1.83	1.56	3.74	2.47	-	-	-
P011	CASSRTLELFF	0.09	1.02	1.38	0.58	-	-	-
P011	CASSTGTGYNEQFF	0.61	0.52	0.82	0.51	-	-	-
P011	CASSLWSATNEKLFF	0.73	0.65	1.98	1.33	-	-	-
P011	CASSLFISDGQYF	0.14	2.48	1.5	1.27	-	-	-
P012	CASSVKEGVGDTGELFF	0.68	0.45	0.34	0.28	0.21	0.12	-
P012	CASSQEPVREQFF	0.75	0.39	0.54	0.73	0.8	0.83	-
P012	CASSQGGKGTEAFF	2.63	1.46	1.67	2.13	1.72	1.26	-
P012	CATRLAGGPGNEQFF	0.6	0.6	1.51	1.45	1.52	0.88	-
P012	CATSLQGNQPQHF	7.99	4.57	4.98	4.85	6.01	3.21	-
P012	CASSSPGGAPSGANVLTF	6.87	3.71	3.03	6.25	5.38	4.96	-
P012	CASSYQGSTEAFF	1.99	1.97	3.4	3.39	3.15	2.57	-
P012	CATSDPLTASYEQYF	1.06	0.82	1.4	1.65	2.07	1.39	-
P012	CATSDPNNEAFF	0.5	0.25	0.3	0.6	0.84	0.55	-
P012	CSVEVYYEQYF	1.06	0.9	1.43	0.4	0.28	0.22	-
P012	CASSLEQETQYF	0.71	0.68	0.9	2.87	2.32	1.6	-
P012	CASSQDGATNQPQHF	5.05	2.51	2.6	3.76	3.37	2.07	-
P012	CASSHRDNEQFF	0.89	0.56	0.67	0.56	0.5	0.38	-
P012	CASSFQGYTEAFF	0.48	0.38	0.22	0.58	0.6	0.53	-
P012	CASTQGGLLNWDTEAFF	0.11	0.25	0.08	0.58	0.3	0.21	-
P012	CASVGASEQETQYF	1.66	1.39	0.82	1.93	1.63	1.51	-
P012	CASSASNTEAFF	2.25	1.47	1.61	1.62	1.67	1.49	-
P012	CAWSVGGNTEAFF	0.54	0.68	0.43	0.84	0.53	0.39	-
P012	CSARDRVGNTIYF	1.56	0.82	1.12	0.56	0.69	0.42	-
P012	CASSLEAGGPPEETQYF	2.24	1.26	0.53	2.07	1.99	1.14	-
P012	CASSPSDGELFF	1.76	0.8	0.79	0.98	1.11	0.78	-
P012	CASSGSNTEAFF	1.18	0.56	0.66	0.8	0.8	0.48	-
P012	CSVEVGGKATEAFF	0.63	0.57	0.7	0.26	0.2	0.25	-
P012	CASRGRGGHTEAFF	0.34	0.63	0.3	2.88	1.69	1.28	-
P012	CASRGTRYEQYF	0.75	0.41	0.27	0.23	0.16	0.12	-
P012	CASSLRGNEQFF	0.13	0.1	0.16	0.19	0.19	0.69	-
P013	CASSPDVGGRHTDTQYF	0.9	0.96	0.99	0.73	-	-	-
P013	CASSRDGRDGEQFF	0	7.77	0.01	0	-	-	-
P013	CASSPTGTSGSGNEQFF	0.69	1.71	1.15	1.61	-	-	-
P013	CASSSGQRGTQYF	0.59	0.98	1.02	0.74	-	-	-
P013	CATSRSEAQPQHF	0.97	1.58	0.58	0.47	-	-	-
P013	CASSLSGRDGEQFF	0	1.64	0	0	-	-	-
P013	CASSYSRGGAGQETQYF	8.34	7.98	6.92	4.95	-	-	-
P013	CASSRRDPRD	0	0	0	1.56	-	-	-
P013	CSARELGTSGGYNEQFF	0	0	0	0.5	-	-	-
P013	CASSLVARGKRSWDEQFF	1.99	3.48	3.22	4.15	-	-	-
P013	CSVETPGTSGRYEQFF	1.09	2.83	0.78	0.55	-	-	-
P013	CASSFEAQWGTRGEDTQYF	0.58	1.02	0.47	1.06	-	-	-
P013	CATSRDRAGRETQYF	0.68	1.52	0.77	0.62	-	-	-
P013	CATKTLRNTGELFF	1.16	1.83	1.69	0.85	-	-	-
P013	CSVEGSNTDTQYF	0	0	0.58	0	-	-	-
P013	CASSFGGPGELFF	0.43	0.67	0.24	0.11	-	-	-
P013	CASSLTDQTYEQYF	0.7	1.31	0.91	1.53	-	-	-
P013	CASSYGKNTGELFF	0.2	0.69	0.19	0.06	-	-	-
P013	CAWSVQGSGELFF	0	0	0	0.87	-	-	-
P013	CASSFSGSDEQYF	0.16	0.68	0.13	0.04	-	-	-
P013	CASRDTSRQVRDEQFF	1.48	0.15	0.03	0.02	-	-	-
P013	CASSTSGLAAYEQYF	0.48	1.07	1.12	1.49	-	-	-
P013	CASSLGRDRVTDEQYF	0	0	0.56	0	-	-	-
P013	CATSREEADEQYF	0.49	1.1	0.33	0.18	-	-	-
P013	CSVAGVVNEQFF	0.95	0.92	0.42	0.52	-	-	-
P013	CASSLGLANEQYF	0	0	0	1.75	-	-	-
P013	CAISDGGSSYNEQFF	0.26	0.35	0.4	0.74	-	-	-
P014	CASSLEGHNEQFF	3.27	-	-	-	-	-	-
P014	CASSYSTGTAYEQYF	0.51	-	-	-	-	-	-
P014	CSAKQGAVNEQYF	0.57	-	-	-	-	-	-
P014	CASSPFRLSGELFF	0.6	-	-	-	-	-	-
P014	CASSHPGGHHYGYTF	0.77	-	-	-	-	-	-
P014	CASSPRSAGGGNEQFF	0.75	-	-	-	-	-	-
P014	CAISRDNPWSEQYF	1.19	-	-	-	-	-	-
P014	CATSRFAGEEQFF	1.15	-	-	-	-	-	-
P014	CASEDTGELFF	3.32	-	-	-	-	-	-
P015	CASSYRGGTEAFF	0.99	0.87	1.27	1.12	0	-	-
P015	CASSLDWGITYEQYF	0	0	0	0	0.76	-	-
P015	CSVMEHTGSSYNEQFF	0	0	0	0	2.48	-	-
P015	CSARGPGQDYNEQFF	0.36	0.56	0.24	0.72	0	-	-
P015	CASSLAGYYEQYF	0	0	0	0	0.85	-	-
P015	CASSYRDSWGTEAFF	1.23	1.07	1.55	1.08	0	-	-
P015	CASSLADSYEQYF	1.11	1.45	1.13	1.21	0	-	-
P015	CASSFQGQGSGEQYF	0.42	0.38	0.55	0.42	0	-	-
P015	CASNLRDLYEQYF	0	0	0	0	1.5	-	-
P015	CASSYLAERSYNEQFF	0	0	0	0	1.88	-	-
P015	CASSQDQGGERYYGYTF	0	0	0	0	0.81	-	-
P015	CASSRRTSGIDNEQFF	0	0	0	0	0.89	-	-
P015	CASSEGTSGFSYEQYF	0	0	0	0	1.4	-	-
P015	CSVDWGQGNTEAFF	0.59	0.64	0.39	0.43	0	-	-
P015	CSARDRRVSYEQYF	1.03	1.25	1.31	1.68	0	-	-
P015	CASSREGSNQPQHF	0	0	0	0	3.76	-	-
P015	CATSRGTVSYEQYF	0	0	0	0	1.05	-	-
P015	CAWSQFTDTQYF	1.04	0.87	1.22	0.84	0	-	-
P015	CASSPPSGRARSYEQYF	0.45	0.37	0.81	0.17	0	-	-
P015	CASSYSYLAGHEQYF	1.26	1.28	1.68	0.88	0	-	-
P015	CASSQTTSGYTF	0	0	0	0	3	-	-
P015	CASSLGVRSTATNEKLFF	0	0	0	0	0.65	-	-
P015	CASSLLQGTGELFF	0	0	0	0	0.56	-	-
P015	CASSQDDPLADTQYF	0.49	0.55	0.45	0.2	0	-	-
P015	CASSETGGTYEQYF	0	0	0	0	2.74	-	-
P015	CSATDPISFYNEQFF	0	0	0	0	1.44	-	-
P015	CASSLTGLAGDEQYF	0	0	0	0	0.58	-	-
P016	CASSDPDDEMNTEAFF	3.04	3.25	3.29	-	-	-	-
P016	CASSLGSADTQYF	20.38	13.09	13.04	-	-	-	-
P016	CASSLGIGYEQYF	2.47	2.26	2.09	-	-	-	-
P016	CASSPVIGSSGANVLTF	5.05	3.8	5.18	-	-	-	-
P016	CASSKRAGVATDTQYF	0.6	0.46	0.3	-	-	-	-
P016	CAWDLGQVGWEQYF	0.56	0.49	0.39	-	-	-	-
P016	CASSLAGGSSYEQYF	1.21	1.06	1.29	-	-	-	-
P016	CASSQGHGSQPQHF	2.56	2.55	3.81	-	-	-	-
P016	CASSFPSAGQETQYF	1.8	1.7	2.93	-	-	-	-
P016	CASSLGLHYEQYF	0.97	1.11	1.34	-	-	-	-
P016	CASSVVPGPWGAFF	1	0.91	0.84	-	-	-	-
P016	CASSEGLAGGHTGELFF	0.54	0.45	0.48	-	-	-	-
P016	CASSLAASEDTQYF	4.66	4.84	10.71	-	-	-	-
P017	CSADPGEASTDTQYF	0.48	0.63	0.56	0.44	-	-	-
P017	CASSLEQAARADTQYF	1.03	1.13	1.24	1.17	-	-	-
P017	CASSPSSVGIQYF	4.73	3.11	2.85	5.88	-	-	-
P017	CASSASLLAGGLETQYF	0.02	0.02	0	0.5	-	-	-
P017	CASSLTGGGSPLHF	0.84	0.53	0.41	0.59	-	-	-
P017	CASSLVGVGEQFF	1.89	2.51	2.33	2.43	-	-	-
P017	CSVDPAFGQETQYF	0.73	0.48	0.41	0.51	-	-	-
P017	CASRGTYYEQYF	1	0.81	0.83	0.92	-	-	-
P017	CASSRGTSNEQYF	1.8	1.82	1.83	1.74	-	-	-
P017	CASSLEQGARTDTQYF	1.27	1.44	1.39	1.21	-	-	-
P017	CSARGAGGSSGVLEQYF	0.02	0.02	0.01	0.52	-	-	-
P017	CASSLEQGARSSQYF	0.51	0.54	0.58	0.77	-	-	-
P017	CASRARGTATDTQYF	0.5	0.41	0.49	0.76	-	-	-
P017	CASSLAGAGNTEAFF	0.03	0.01	0.02	0.53	-	-	-
P018	CASSGGEGYNEQFF	0.54	0.33	-	-	-	-	-
P018	CASRDSYNEQFF	1.73	1.62	-	-	-	-	-
P018	CASSPVGGVEKLFF	8.39	7.95	-	-	-	-	-
P018	CASSLGMGAAYEQYF	0.95	0.8	-	-	-	-	-
P018	CATVDGRGTGELFF	0.74	1.58	-	-	-	-	-
P018	CAWTPGFSDTQYF	0.4	0.51	-	-	-	-	-
P018	CASSFKGYETQYF	13.74	9.86	-	-	-	-	-
P018	CASSASAVVTGELFF	4.37	10.07	-	-	-	-	-
P018	CASGRPGYEQYF	0.63	0.59	-	-	-	-	-
P018	CASSLAQGQGDYEQYF	1.61	1.11	-	-	-	-	-
P019	CASSYLLPDREGQPQHF	1.05	1.01	-	-	-	-	-
P019	CASSPQSGIGEQYF	0.91	0.78	-	-	-	-	-
P019	CASRPPGTNTGELFF	1.25	0.98	-	-	-	-	-
P019	CASSFRADTQYF	0.68	1.24	-	-	-	-	-
P019	CASSPRQGETQYF	0.96	0.94	-	-	-	-	-
P019	CATGDLEGTEAFF	0.29	0.71	-	-	-	-	-
P019	CASSQAGDPSNQPQHF	1.35	2.81	-	-	-	-	-
P019	CAKNGTGGLNEQFF	1.85	1.16	-	-	-	-	-
P019	CASSLSREYTGELFF	0.94	0.27	-	-	-	-	-
P019	CASSPEGQPRETQYF	1.21	1.45	-	-	-	-	-
P019	CATSRDTLAGAGTDTQYF	0.8	1.55	-	-	-	-	-
P019	CATSRVAGETQYF	0.76	0.72	-	-	-	-	-
P019	CASSLGETQYF	11.84	18.51	-	-	-	-	-
P019	CASSMDFSETQYF	3.11	3.37	-	-	-	-	-
P019	CASSGPTSGRGVNEQFF	5.55	3.28	-	-	-	-	-
P019	CASSVGGGPQETQYF	2.26	2.19	-	-	-	-	-
P019	CATSRDSLAGAEGDTQYF	2.82	4.5	-	-	-	-	-
P019	CASSAFDEDEQFF	0.32	0.62	-	-	-	-	-
P020	CASSVGPHEQYF	0.54	-	-	-	-	-	-
P020	CASSQGPGDLYEQYF	5.5	-	-	-	-	-	-
P020	CARGSGYSTDTQYF	1.25	-	-	-	-	-	-
P020	CASTGPPNTGELFF	0.75	-	-	-	-	-	-
P020	CASSLEAGAGRETQYF	0.87	-	-	-	-	-	-
P020	CSVEASLAGGRYEQYF	0.56	-	-	-	-	-	-
P020	CASSYSTSGGVLETQYF	1.63	-	-	-	-	-	-
P020	CASSPWDTSYEQYF	0.71	-	-	-	-	-	-
P020	CATSDETDSGNTIYF	1.08	-	-	-	-	-	-
P020	CASSFEYGDGNTEAFF	1.2	-	-	-	-	-	-
P020	CASSQGDYEQYF	1.01	-	-	-	-	-	-
P020	CASSLGQRGTQYF	0.88	-	-	-	-	-	-
P020	CASTGGVTYEQYF	8.5	-	-	-	-	-	-
P021	CASSYAYMGERNF	0.7	-	-	-	-	-	-
P021	CASSPRESSGNTIYF	0.78	-	-	-	-	-	-
P021	CSAHHGTSTYEQYF	0.97	-	-	-	-	-	-
P021	CASKLSYRQGVTGYTF	1.06	-	-	-	-	-	-
P021	CASRGQETQYF	0.64	-	-	-	-	-	-
P021	CASSLRSGNTIYF	0.91	-	-	-	-	-	-
P021	CASSSTGTSGSGNTQYF	16.41	-	-	-	-	-	-
P021	CASSQGRPLAGASYEQYF	0.78	-	-	-	-	-	-
P021	CASSPVSGETQYF	0.88	-	-	-	-	-	-
P021	CASSLGGRGSNTEAFF	1.43	-	-	-	-	-	-
P021	CASSYWGKLFF	3.2	-	-	-	-	-	-
P021	CASSLSGANSYGYTF	3.8	-	-	-	-	-	-
P021	CASSLAGTSYEQYF	7.44	-	-	-	-	-	-
P021	CASSALGPVHYEQYF	1.81	-	-	-	-	-	-
P021	CASSQRDNEQFF	2	-	-	-	-	-	-
P021	CASSPNAGLEQFF	0.54	-	-	-	-	-	-
P021	CASTPRGQNTGELFF	1.02	-	-	-	-	-	-
P021	CASSYVPGNNEQFF	0.63	-	-	-	-	-	-
P021	CASSLWRAGTQYF	0.75	-	-	-	-	-	-
P021	CAISHDWDMNTEAFF	2.45	-	-	-	-	-	-
P021	CASSQEQGAGETQYF	0.52	-	-	-	-	-	-
P021	CASSPIGTLASEQFF	4.17	-	-	-	-	-	-
P021	CASATGPGRGEAFF	0.92	-	-	-	-	-	-
P022	CASSLVGREYEQYF	3.34	-	-	-	-	-	-
P022	CASSEFGEFNEQFF	1	-	-	-	-	-	-
P022	CATSRDTLAGAPTDTQYF	1.65	-	-	-	-	-	-
P022	CASSTDTTYEQYF	1.25	-	-	-	-	-	-
P022	CASWDHGNQPQHF	1.56	-	-	-	-	-	-
P022	CSVEGGQGTRDTEAFF	0.85	-	-	-	-	-	-
P022	CASSQDMDRVNTGELFF	1.99	-	-	-	-	-	-
P022	CASSWDRELNYGYTF	1.46	-	-	-	-	-	-
P022	CSAVEPRTVVRGYTF	0.77	-	-	-	-	-	-
P022	CASRPGFLNEKLFF	1.35	-	-	-	-	-	-
P022	CATTGGEYNEQFF	2.3	-	-	-	-	-	-
P022	CASSFRDRVDSPLHF	1.17	-	-	-	-	-	-
P022	CASSEPERVAGGAGETQYF	0.51	-	-	-	-	-	-

## Sheet: Supplementary Table S10
Supplementary Table S10. The IFN-γ spots of 9 post-RFA patients (Left) and response in post-RFA and non-RFA patients (Right) before iNeo-Vac-P01 treatment
Patient ID	Experimental control / Number of peptide	IFN-γ spots	IFN-γ spots per 105 PBMCs	Response			Patient ID	Positive pre-vax?	Positive rate	Tumor type	Position of RFA	Duration between last RFA and vax (Weeks)
P004	Negative control	0	0	/		RFA	P004	Yes	0.444	Small Cell Lung Cancer	Lung	13.4
		0	0				P008	Yes		Pancreatic Carcinoma	Liver	13.4
	Positive control	187	93.5	/			P014	Yes		Melanoma	Liver	28.3
		175	87.5				P019	Yes		Gastric carcinoma	Liver	56.9
	02B、04、05B	2	1	Negative			P010	No		Colon Cancer	Lung	15.4
		2	1				P013	No		Melanoma	Liver	11.1
	10B、13、14	1	0.5	Negative			P015	No		Biliary Tract Cancer	Liver	8.1
		0	0				P020	No		Colon cancer	Lung	13
	17B、23B、48	9	4.5	Weak Positive			P021	No		Non-Small Cell Lung Cancer	Lung	36
		8	4			Non-RFA	P001	No	0.077	Melanoma	/	/
	56、57、58	4	2	Negative			P002	No		Ovarian Cancer	/	/
		2	1				P003	No		Adrenal Sebaceous Adenocarcinoma	/	/
	59、60、61	1	0.5	Negative			P005	No		Biliary Tract Cancer	/	/
		1	0.5				P006	Yes		Colon Cancer	/	/
	63、64	0	0	Negative			P007	No		Non-Small Cell Lung Cancer	/	/
		1	0.5				P009	No		Pancreatic Carcinoma	/	/
P008	Negative control	7	3.5	/			P011	No		Ovarian Cancer	/	/
		10	5				P012	No		Breast Cancer	/	/
	Positive control	43	21.5	/			P016	No		Non-Small Cell Lung Cancer	/	/
		45	22.5				P017	No		Melanoma	/	/
	02、03、05	15	7.5	Weak Positive			P018	No		Parotid carcinoma	/	/
		20	10				P022	No		Colon cancer	/	/
	13、14、21	15	7.5	Negative
		16	8
	24、25、26	21	10.5	Weak Positive
		24	12
	27、28、29	17	8.5	Weak Positive
		23	11.5
	31、32、33	16	8	Negative
		15	7.5
P010	Negative control	7	3.5	/
		12	6
	Positive control	197	98.5	/
		209	104.5
	02、03、04	15	7.5	Negative
		19	9.5
	05、07、12	6	3	Negative
		11	5.5
	14、16、17	8	4	Negative
		19	9.5
	18、19B、21	9	4.5	Negative
		7	3.5
	22、24、25、26	26	13	Negative
		5	2.5
P013	Negative control	1	0.4	/
		0	0
	Positive control	189	75.6	/
		168	67.2
	1	2	0.8	Negative
	4	1	0.4	Negative
	5	2	0.8	Negative
	7	0	0	Negative
	8	8	3.2	Negative
	9	8	3.2	Negative
	10	0	0	Negative
	11	1	0.4	Negative
	12	0	0	Negative
	14	1	0.4	Negative
	15	0	0	Negative
	16	0	0	Negative
	17	1	0.4	Negative
	19	1	0.4	Negative
P014	Negative control	0	0	/
		2	0.8
	Positive control	690	276	/
		709	283.6
	1	13	5.2	Weak Positive
	2	7	2.8	Negative
	3	4	1.6	Negative
	5	2	0.8	Negative
	6	0	0	Negative
	7	0	0	Negative
	8	3	1.2	Negative
	9	0	0	Negative
	10	5	2	Negative
	11	0	0	Negative
	12	1	0.4	Negative
	18	3	1.2	Negative
	22	3	1.2	Negative
	23	0	0	Negative
	24	2	0.8	Negative
	25	1	0.4	Negative
	26	1	0.4	Negative
	27	2	0.8	Negative
P015	Negative control	14	7	/
	Positive control	21	10.5	/
		11	5.5
	1、2、3	18	9	Negative
	4、6、7	21	10.5	Negative
	9、10、12	20	10	Negative
	15、16、18	19	9.5	Negative
	19、20	21	10.5	Negative
P019	Negative control	152	76	/
	Positive control	>1000		/
	3	190	95	Positive
		222	111
	4	152	76	Negative
		100	50
	6	139	69.5	Negative
		65	32.5
	12	68	34	Negative
		69	34.5
	13	196	98	Positive
		237	118.5
	14	191	95.5	Positive
		180	90
	16	79	39.5	Negative
		76	38
	19	122	61	Negative
		144	72
	20	159	79.5	Negative
		158	79
P020	Negative control	0	0	/
		0	0
	Positive control	117	58.5	/
		97	48.5
	6	3	0.909091	Negative
		3	0.909091
	7	4	1.21212	Negative
		2	0.606061
	12	5	1.51515	Negative
		2	0.606061
	14	2	0.606061	Negative
		2	0.606061
	17	3	0.909091	Negative
		3	0.909091
	18	5	1.51515	Negative
		7	2.12121
	21	4	1.21212	Negative
		2	0.606061
P021	Negative control	1	0.5	/
	Positive control	389	194.5	/
	2、5	2	0.606061	Negative
		2	0.606061
	11、12	4	1.21212	Negative
		5	1.51515
	18、19	1	0.30303	Negative
		3	0.909091
